# Supplementary material for: Gut content metabarcoding of specialized feeders is not a replacement for environmental DNA assays of seawater in reef environments
Source: PeerJ. 2023 Sep 27;11:e16075. doi: 10.7717/peerj.16075 (PMC10542274; doi:10.7717/peerj.16075)
Supplement: Supplemental Information 1 — The numbers in cells are the number of unique reads per ZOTU. BLANK4 refers to one of the extraction blanks that produced reads, indicated by the highlighted rows in yellow, which was removed from the “18Suni_ZOTUS_CLEAN” and “ITS2_ZOTUS_CLEAN” tabs. The sample_data tab provides metadata for each sample. [file peerj-11-16075-s001.xlsx]

## Sheet: 18Suni_ZOTUS
S1 Appendix. 18Suni assay and ITS2 assay ZOTU assignment based on DNA isolated from seawater and oval butterflyfish (Chaetodon lunulatus) gut samples collected at 10 sites from Dongsha Atoll (Taiwan) in the South China Sea. The numbers in cells are the number of unique reads per ZOTU. BLANK4 refers to one of the extraction blanks that produced reads, indicated by the highlighted rows in yellow, w…
domain	phylum	class	order	family	genus	species	ZOTU	numberOfUnq_BlastHits	BLANK1	BLANK2	BLANK3	BLANK4	Clu1a	Clu2a	Clu3a	Clu4a	Clu5a	Clu6a	Clu7a	Clu8a	Clu9a	Clu10a	Clu11a	Clu12a	Clu13a	Clu14a	Clu15a	Clu16a	Clu17a	Clu18a	Clu19a	Clu20a	Clu21a	Clu23a	Clu24a	Clu25a	Clu26a	Clu27a	Clu28b	Clu29b	Clu30b	Clu32b	Clu33b	Clu34b	Clu35b	Clu36b	Clu37b	Clu38b	Clu39b
Eukaryota	Annelida	Polychaeta	Phyllodocida	Polynoidae	dropped	dropped	Zotu1866	9	0	0	0	0	0	0	0	0	0	0	0	0	0	0	0	0	0	0	0	0	0	0	0	0	0	0	0	0	0	0	0	0	0	0	0	0	0	0	0	0	0
Eukaryota	Annelida	Polychaeta	Spionida	Spionidae	Aurospio	Aurospio dibranchiata	Zotu388	1	0	0	0	0	0	0	0	0	0	0	0	0	0	0	0	0	0	0	0	0	0	0	0	0	0	0	0	0	0	0	0	0	0	0	0	0	0	0	0	0	0
Eukaryota	Annelida	Polychaeta	Terebellida	Terebellidae	Loimia	dropped	Zotu1950	2	0	0	0	0	0	0	0	0	0	0	0	0	0	0	0	0	0	0	0	0	0	0	0	0	0	0	0	0	0	0	0	0	0	0	0	0	0	0	0	0	0
Eukaryota	Annelida	Polychaeta		Capitellidae	Dasybranchus	dropped	Zotu2703	2	0	0	0	0	0	0	0	0	0	0	0	0	0	0	0	0	0	0	0	0	0	0	0	0	0	0	0	0	0	0	0	0	0	0	0	0	0	0	0	0	0
Eukaryota	Annelida	Polychaeta		Nerillidae	Leptonerilla	Leptonerilla sp. 'Scripps Aquarium'	Zotu2138	1	0	0	0	0	0	0	0	0	0	0	0	0	0	0	0	0	0	0	0	0	0	0	0	0	0	0	0	0	0	0	0	0	0	0	0	0	0	0	0	0	0
Eukaryota	Annelida	Polychaeta				Palpata sp. PO2	Zotu413	1	0	0	0	0	0	0	0	0	0	0	0	0	0	0	0	0	0	0	0	0	0	0	0	0	0	0	0	0	0	0	0	0	0	0	0	0	0	0	0	0	0
Eukaryota	Arthropoda	Hexanauplia	Calanoida	Pseudodiaptomidae	Pseudodiaptomus	Pseudodiaptomus nihonkaiensis	Zotu6	1	0	0	0	0	0	0	0	0	0	0	0	0	0	0	0	0	0	0	0	0	0	0	0	0	0	0	0	0	0	0	0	0	0	0	0	0	0	0	0	0	0
Eukaryota	Arthropoda	Hexanauplia	Cyclopoida	dropped	dropped	dropped	Zotu28	2	0	0	0	0	1	2	0	0	2	2	0	1	8	0	0	2	2	0	0	0	0	0	0	0	0	0	0	0	13	0	0	0	0	0	0	0	0	1	9	10	0
Eukaryota	Arthropoda	Hexanauplia	Cyclopoida	Xarifiidae	Xarifia	Xarifia sp. New Caledonia-RJH-2004	Zotu1662	1	0	0	0	0	0	0	0	0	5	0	0	0	6	2	0	0	1	0	0	1	0	0	0	0	0	3	0	0	0	0	0	0	0	0	0	0	0	0	51	3	0
Eukaryota	Arthropoda	Hexanauplia	Harpacticoida	Thalestridae	Parathalestris	Parathalestris verrucosa	Zotu646	1	0	0	0	0	0	0	0	0	0	0	1	0	0	0	0	0	0	0	0	0	0	0	0	0	0	0	0	0	0	0	0	0	0	0	0	0	0	0	0	0	0
Eukaryota	Arthropoda	Hexanauplia	Sessilia	dropped	dropped	dropped	Zotu702	8	0	0	0	0	0	0	0	0	0	0	0	0	0	0	0	0	0	0	0	0	0	0	0	0	0	0	0	0	0	0	0	0	0	0	0	0	0	0	0	0	0
Eukaryota	Arthropoda	Hexanauplia				dropped	Zotu1541	3	0	0	0	0	0	0	0	0	0	0	0	0	0	0	0	0	0	0	0	0	0	0	0	0	0	0	0	0	0	0	0	0	0	0	0	0	0	0	0	0	0
Eukaryota	Arthropoda	Malacostraca	Decapoda	dropped	dropped	dropped	Zotu1180	10	0	0	0	0	0	0	0	0	0	0	0	0	0	0	0	0	0	0	0	0	0	0	0	0	0	0	0	0	0	0	0	0	0	0	0	0	0	0	0	0	0
Eukaryota	Ascomycota	Sordariomycetes	Hypocreales	Hypocreaceae	Trichoderma	dropped	Zotu27	6	19069	1	0	0	0	0	0	0	0	0	0	0	0	0	0	0	0	0	169	0	0	0	0	0	0	0	0	0	0	0	0	0	0	0	0	0	0	0	0	0	0
Eukaryota	Bacillariophyta	Bacillariophyceae	Thalassiophysales	Catenulaceae	Amphora	Amphora coffeiformis	Zotu2479	1	0	0	0	0	0	0	0	0	0	0	0	0	1	0	0	0	0	0	0	0	0	0	0	0	0	0	0	0	0	0	0	0	0	0	0	0	0	0	0	0	0
Eukaryota	Bacillariophyta	Coscinodiscophyceae	Rhizosoleniales	Rhizosoleniaceae	Dactyliosolen	Dactyliosolen blavyanus	Zotu505	1	0	0	0	0	0	0	0	0	0	0	0	0	0	0	0	0	0	0	0	0	0	0	0	0	0	0	0	0	0	0	0	0	0	0	0	0	0	0	0	0	0
Eukaryota	Bacillariophyta	Fragilariophyceae	Thalassionemales	Thalassionemataceae	Thalassionema	dropped	Zotu550	2	0	0	0	0	0	0	0	0	0	0	0	0	0	0	0	0	0	0	0	0	0	0	0	0	0	0	0	0	0	0	0	0	0	0	0	0	0	0	0	0	0
Eukaryota	Bacillariophyta					uncultured diatom	Zotu168	1	0	0	0	0	0	0	0	0	0	0	0	0	0	0	0	0	0	0	0	0	0	0	0	0	0	0	0	0	0	0	0	0	0	0	0	0	0	0	0	0	0
Eukaryota	Basidiomycota	Malasseziomycetes	dropped	dropped	dropped	dropped	Zotu442	3	437	0	0	0	0	0	0	0	0	0	0	0	0	0	0	0	0	0	0	0	0	0	0	0	0	0	0	1	0	0	0	0	0	0	0	0	0	0	0	0	8
Eukaryota	Chlorophyta	Chlorophyceae	Oedogoniales	Oedogoniaceae	dropped	dropped	Zotu237	8	0	0	0	1456	0	0	0	0	0	0	0	0	0	0	0	0	0	0	0	0	0	0	0	0	0	0	0	0	0	0	0	0	0	0	0	0	0	0	0	0	0
Eukaryota	Chlorophyta	dropped	dropped	dropped	dropped	dropped	Zotu78	5	0	0	4113	0	0	0	0	3	0	0	0	0	0	0	0	0	0	0	0	0	0	0	0	0	0	0	0	0	0	0	0	0	0	0	0	0	0	0	0	0	0
Eukaryota	Chlorophyta	dropped	dropped	dropped	dropped	dropped	Zotu1105	8	0	0	0	0	0	0	0	0	0	0	0	0	0	0	0	0	0	0	0	0	0	0	0	0	0	0	0	0	0	0	0	0	0	0	0	0	0	0	0	0	0
Eukaryota	Chlorophyta	Trebouxiophyceae	Chlorellales	Chlorellaceae	Nannochloris	Nannochloris sp. MBIC10749	Zotu774	1	0	0	0	0	0	0	0	0	0	0	0	0	0	0	0	0	0	0	0	0	0	0	0	0	0	0	0	0	0	0	0	0	0	0	0	0	0	0	0	0	0
Eukaryota	Chlorophyta	Ulvophyceae	Dasycladales	Polyphysaceae	Parvocaulis	Parvocaulis clavatus	Zotu1392	1	0	0	0	0	0	0	0	0	0	0	0	0	0	0	0	0	0	0	0	0	0	0	0	0	0	0	0	0	0	0	0	0	0	0	0	0	0	0	0	0	0
Eukaryota	Chlorophyta	Ulvophyceae	Dasycladales	Polyphysaceae	Parvocaulis	Parvocaulis parvulus	Zotu982	1	0	0	0	0	0	0	0	0	0	0	0	0	0	0	0	0	0	0	0	0	0	0	0	0	0	0	0	0	0	0	0	0	0	0	0	0	0	0	0	0	0
Eukaryota	Chlorophyta	Ulvophyceae	Dasycladales	Polyphysaceae	Parvocaulis	Parvocaulis parvulus	Zotu1009	1	0	0	0	0	0	0	0	0	0	0	0	0	0	0	0	0	0	0	0	0	0	0	0	0	0	0	0	0	0	0	0	0	0	0	0	0	0	0	0	0	0
Eukaryota	Chlorophyta	Ulvophyceae	Dasycladales	Polyphysaceae	Parvocaulis	Parvocaulis parvulus	Zotu1097	1	0	0	0	0	0	0	0	0	0	0	0	0	0	0	0	0	0	0	0	0	0	0	0	0	0	0	0	0	0	0	0	0	0	0	0	0	0	0	0	0	0
Eukaryota	Chlorophyta	Ulvophyceae	Dasycladales	Polyphysaceae	Parvocaulis	Parvocaulis parvulus	Zotu2126	1	0	0	0	0	0	0	0	0	0	0	0	0	0	0	0	0	0	0	0	0	0	0	0	0	0	0	0	0	0	0	0	0	0	0	0	0	0	0	0	0	0
Eukaryota	Chlorophyta	Ulvophyceae	Ulvales	dropped	dropped	dropped	Zotu2199	7	0	0	0	0	0	0	0	0	0	0	0	0	0	0	0	0	0	0	0	0	0	0	0	0	0	0	0	0	0	0	0	0	0	0	0	0	0	0	0	0	0
Eukaryota	Chlorophyta					uncultured Chlorophyta	Zotu29	1	2681	0	0	0	0	0	0	0	0	0	0	0	0	0	0	0	0	0	0	0	0	0	0	0	0	0	0	0	0	0	0	0	0	0	0	0	0	0	0	0	0
Eukaryota	Chordata	Actinopteri		Pomacentridae	Amphiprion	Amphiprion ocellaris	Zotu1585	1	0	0	0	0	0	0	0	0	0	0	0	0	0	0	0	0	0	0	0	0	0	0	0	0	0	0	0	0	0	0	0	0	0	0	0	0	0	0	0	0	0
Eukaryota	Chordata	Ascidiacea	Stolidobranchia	Styelidae	dropped	dropped	Zotu868	3	0	0	0	0	0	0	0	0	0	0	0	0	0	0	0	0	0	0	0	0	0	0	0	0	0	0	0	0	0	0	0	0	0	0	0	0	0	0	0	0	0
Eukaryota	Chordata	Ascidiacea	Stolidobranchia	Styelidae	dropped	dropped	Zotu1636	3	0	0	0	0	0	0	0	0	0	0	0	0	0	0	0	0	0	0	0	0	0	0	0	0	0	0	0	0	0	0	0	0	0	0	0	0	0	0	0	0	0
Eukaryota	Chordata	Ascidiacea	Stolidobranchia	Styelidae	dropped	dropped	Zotu2187	3	0	0	0	0	0	0	0	0	0	0	0	0	0	0	0	0	0	0	0	0	0	0	0	0	0	0	0	0	0	0	0	0	0	0	0	0	0	0	0	0	0
Eukaryota	Chordata	Ascidiacea	Stolidobranchia	Styelidae	Polycarpa	Polycarpa mytiligera	Zotu2249	1	0	0	0	0	0	0	0	0	0	0	0	0	0	0	0	0	0	0	0	0	0	0	0	0	0	0	0	0	0	0	0	0	0	0	0	0	0	0	0	0	0
Eukaryota	Chordata	Mammalia	Primates	dropped	dropped	dropped	Zotu1841	7	0	0	0	0	0	0	0	0	0	0	0	0	0	0	0	0	0	0	0	0	0	0	0	0	1	0	69	0	0	0	0	0	0	0	0	0	0	0	0	0	0
Eukaryota	Chytridiomycota					uncultured Chytridiomycota	Zotu311	1	563	0	0	0	0	0	0	0	0	0	0	0	0	0	0	0	0	0	0	0	0	0	0	0	0	0	0	0	0	0	0	0	0	0	0	0	0	0	0	0	0
Eukaryota	Ciliophora	dropped	dropped	dropped	dropped	dropped	Zotu1172	6	0	0	0	0	0	0	0	0	0	0	0	0	0	0	0	0	0	0	0	0	0	0	0	0	0	0	0	0	0	0	0	0	0	0	0	0	0	0	0	0	0
Eukaryota	Ciliophora	Litostomatea	Haptorida	Spathidiidae	Cultellothrix	Cultellothrix coemeterii	Zotu35	1	1	1127	0	14466	0	0	0	0	0	0	0	0	0	0	0	0	0	0	0	0	0	0	0	0	0	0	0	0	0	0	0	0	0	0	0	0	0	0	0	0	0
Eukaryota	Ciliophora	Litostomatea	Pleurostomatida	Litonotidae	Litonotus	Litonotus paracygnus	Zotu362	1	0	0	0	0	0	0	0	0	0	0	0	0	0	0	0	0	0	0	0	0	0	0	0	0	0	0	0	0	0	0	688	0	0	0	0	0	0	0	0	0	0
Eukaryota	Ciliophora	Litostomatea				Haptoria sp. bLaN1	Zotu111	1	0	0	0	0	0	0	0	0	0	0	0	0	0	0	0	0	0	0	0	0	0	0	0	0	0	0	0	0	0	0	0	0	0	0	0	0	0	0	0	0	0
Eukaryota	Cnidaria	Anthozoa	Scleractinia	Acroporidae	Acropora	Acropora aspera	Zotu2025	1	0	0	0	0	0	0	0	0	0	0	0	0	0	0	0	0	0	0	0	0	0	0	0	0	0	0	0	0	0	0	0	0	35	0	0	0	0	0	0	0	0
Eukaryota	Cnidaria	Anthozoa	Scleractinia	Acroporidae	Acropora	Acropora lutkeni	Zotu771	1	0	0	0	0	0	0	0	0	0	0	0	0	0	0	0	0	0	0	0	0	0	0	0	0	0	0	0	0	0	0	0	0	0	0	0	0	0	3	334	50	11
Eukaryota	Cnidaria	Anthozoa	Scleractinia	Acroporidae	Acropora	dropped	Zotu143	8	0	0	0	0	0	0	0	0	0	0	0	0	0	0	0	0	0	0	0	0	0	0	0	0	0	0	0	0	0	0	1173	214	0	0	0	0	886	123	0	17	0
Eukaryota	Cnidaria	Anthozoa	Scleractinia	Acroporidae	Acropora	dropped	Zotu449	9	0	0	0	0	11	0	0	0	0	0	0	0	0	0	0	0	0	0	0	0	0	0	0	0	0	0	0	0	0	0	2	231	5	0	0	0	335	0	0	0	0
Eukaryota	Cnidaria	Anthozoa	Scleractinia	Acroporidae	Acropora	dropped	Zotu553	8	0	0	0	0	0	0	0	0	0	1	0	0	0	0	0	0	0	0	0	0	0	0	0	0	0	0	0	0	0	0	214	54	0	0	0	0	139	22	0	1	0
Eukaryota	Cnidaria	Anthozoa	Scleractinia	Acroporidae	Acropora	dropped	Zotu554	2	0	0	0	0	0	0	0	0	0	346	0	0	0	0	0	0	0	0	0	0	0	0	0	0	0	0	0	0	0	0	0	159	0	8	0	0	201	41	0	0	0
Eukaryota	Cnidaria	Anthozoa	Scleractinia	Acroporidae	Acropora	dropped	Zotu592	6	0	0	0	0	5	0	0	0	0	0	0	0	0	0	0	0	0	0	0	0	0	0	0	0	0	0	0	0	0	0	0	168	36	0	0	1	335	3	0	0	0
Eukaryota	Cnidaria	Anthozoa	Scleractinia	Acroporidae	Acropora	dropped	Zotu1159	2	0	0	0	0	0	0	0	0	0	101	0	0	0	1	0	0	1	0	0	0	0	0	0	0	0	0	0	0	0	0	0	32	0	0	0	0	21	0	0	0	0
Eukaryota	Cnidaria	Anthozoa	Scleractinia	Acroporidae	Acropora	dropped	Zotu1481	5	0	0	0	0	2	0	0	0	0	2	0	0	0	0	0	0	0	0	0	0	0	0	0	0	0	0	0	0	0	0	1	4	0	0	0	0	75	0	0	0	0
Eukaryota	Cnidaria	Anthozoa	Scleractinia	Acroporidae	Acropora	dropped	Zotu1559	6	0	0	0	0	0	0	0	0	0	0	0	0	0	0	0	0	0	0	0	0	0	2	0	0	0	0	0	0	0	0	0	0	0	0	0	0	0	0	0	12	0
Eukaryota	Cnidaria	Anthozoa	Scleractinia	Acroporidae	Acropora	dropped	Zotu1774	2	0	0	0	0	1	0	0	0	0	0	0	0	2	0	0	0	0	0	0	0	0	0	0	0	0	0	0	0	0	0	0	25	0	0	0	0	15	0	0	0	0
Eukaryota	Cnidaria	Anthozoa	Scleractinia	Acroporidae	Acropora	dropped	Zotu2263	2	0	0	0	0	4	0	0	0	0	0	0	0	0	0	0	0	0	0	0	0	0	0	0	0	0	0	0	0	0	0	0	34	10	0	0	0	42	0	0	0	0
Eukaryota	Cnidaria	Anthozoa	Scleractinia	Agariciidae	dropped	dropped	Zotu13	8	0	0	0	0	265	9	79	0	3157	1169	2163	6140	6872	18521	45	1609	6	2427	674	0	2	3712	1649	5	0	109	1573	2654	0	252	5	2	1386	676	3833	77	1319	1429	1705	11636	12609
Eukaryota	Cnidaria	Anthozoa	Scleractinia	dropped	dropped	dropped	Zotu1	8	0	0	0	0	229537	15840	18569	383	7995	7644	40460	10807	25193	117699	14238	22276	12914	24964	73256	26878	20713	28132	18556	19545	111380	39745	142981	120437	178207	172113	149167	42530	95831	120286	15879	114736	19527	143255	53378	30334	8569
Eukaryota	Cnidaria	Anthozoa	Scleractinia	dropped	dropped	dropped	Zotu3	10	0	0	0	0	21538	7445	18739	113	12650	17182	61036	3139	25703	20440	2938	1174	8655	1582	1393	38	90	1968	28	465	530	1273	18034	11798	5515	462	1908	15140	5284	376	3	51	388	650	21265	718	62
Eukaryota	Cnidaria	Anthozoa	Scleractinia	Pocilloporidae	dropped	dropped	Zotu32	6	0	0	0	0	0	0	0	0	0	0	0	3	13	0	16	0	1	0	0	3	37	11	12	0	0	8	0	0	0	0	0	0	3	3	0	1	3	43	7384	3113	13179
Eukaryota	Cnidaria	Hydrozoa	Anthoathecata	dropped	dropped	dropped	Zotu2680	8	0	0	0	0	0	0	0	0	0	0	0	0	0	0	0	0	0	0	0	0	0	0	0	0	0	0	0	0	1	0	0	0	0	0	0	0	0	0	0	0	0
Eukaryota	dropped	dropped	dropped	dropped	dropped	dropped	Zotu2	2	3	1	1	1	0	0	0	0	0	0	0	0	0	0	0	0	0	0	0	0	0	0	0	0	0	0	0	0	0	0	0	0	0	0	0	0	0	0	0	0	0
Eukaryota	dropped	dropped	dropped	dropped	dropped	dropped	Zotu7	2	0	0	0	0	0	0	0	0	0	0	0	0	0	0	0	0	0	0	0	0	0	0	0	0	0	0	0	0	0	0	0	0	0	0	0	0	0	0	0	0	0
Eukaryota	dropped	dropped	dropped	dropped	dropped	dropped	Zotu10	6	1	0	1	70861	0	0	0	0	0	0	0	0	0	0	0	0	0	0	0	0	0	0	0	0	0	0	0	0	0	0	0	0	0	0	0	0	0	0	0	0	0
Eukaryota	dropped	dropped	dropped	dropped	dropped	dropped	Zotu15	3	0	0	0	0	0	0	0	0	0	0	0	0	0	0	0	0	0	0	0	0	0	0	0	0	0	0	0	0	0	0	0	0	0	0	0	0	0	0	0	0	0
Eukaryota	dropped	dropped	dropped	dropped	dropped	dropped	Zotu18	2	0	0	0	0	0	0	0	0	0	0	0	0	0	0	0	0	0	0	0	0	0	0	0	0	0	0	0	0	0	0	0	0	0	0	0	0	0	0	0	0	0
Eukaryota	dropped	dropped	dropped	dropped	dropped	dropped	Zotu20	6	717	31576	0	0	0	0	0	0	0	0	0	0	0	0	0	0	0	0	0	0	0	0	0	0	0	0	0	0	0	0	0	0	0	0	0	0	0	0	0	0	0
Eukaryota	dropped	dropped	dropped	dropped	dropped	dropped	Zotu21	2	0	0	0	0	0	0	0	0	0	0	0	0	0	0	0	0	0	0	0	0	0	0	0	0	0	0	0	0	0	0	0	0	0	0	0	0	0	0	0	0	0
Eukaryota	dropped	dropped	dropped	dropped	dropped	dropped	Zotu24	3	0	0	0	0	0	0	0	0	0	0	0	0	0	0	0	0	0	0	0	0	0	0	0	0	0	0	0	0	0	0	0	0	0	0	0	0	0	0	0	0	0
Eukaryota	dropped	dropped	dropped	dropped	dropped	dropped	Zotu26	8	1	0	26322	53	0	0	0	0	0	0	0	0	0	0	0	0	1	2	1416	0	0	0	0	0	0	0	0	0	0	0	0	0	0	0	0	0	0	0	0	0	0
Eukaryota	dropped	dropped	dropped	dropped	dropped	dropped	Zotu30	9	0	42334	0	0	0	0	0	0	0	0	0	0	0	0	0	0	0	0	0	0	0	0	0	0	0	0	0	0	0	0	0	0	0	0	0	0	0	0	0	0	0
Eukaryota	dropped	dropped	dropped	dropped	dropped	dropped	Zotu33	5	0	0	0	1	0	0	0	0	0	0	0	0	0	0	0	0	0	0	0	0	0	0	0	0	0	0	0	0	0	0	0	0	0	0	0	0	0	0	0	0	0
Eukaryota	dropped	dropped	dropped	dropped	dropped	dropped	Zotu34	4	0	0	0	14863	0	0	0	0	0	0	0	0	0	0	0	0	0	0	0	0	0	0	0	0	0	0	37	0	0	0	0	0	0	0	0	0	0	0	0	0	0
Eukaryota	dropped	dropped	dropped	dropped	dropped	dropped	Zotu43	5	0	0	0	0	0	0	0	0	0	0	0	0	0	0	0	0	0	0	0	0	0	0	0	0	0	0	0	0	0	0	0	0	0	0	0	0	0	0	0	0	0
Eukaryota	dropped	dropped	dropped	dropped	dropped	dropped	Zotu48	3	0	0	0	0	0	0	0	0	0	0	0	0	0	0	0	0	0	0	0	0	0	0	0	0	0	0	0	0	0	0	0	0	0	0	0	0	0	0	0	0	0
Eukaryota	dropped	dropped	dropped	dropped	dropped	dropped	Zotu55	5	0	0	0	0	0	0	0	0	0	0	0	0	0	0	0	0	0	0	0	0	0	0	0	0	0	0	0	0	0	0	0	0	0	0	0	0	0	0	0	0	0
Eukaryota	dropped	dropped	dropped	dropped	dropped	dropped	Zotu58	7	0	0	0	0	2	0	0	0	0	0	0	0	0	0	0	0	0	0	0	0	0	0	0	0	0	0	0	0	0	0	0	0	0	0	0	0	0	0	0	0	0
Eukaryota	dropped	dropped	dropped	dropped	dropped	dropped	Zotu66	3	0	0	0	0	0	0	0	0	0	0	0	0	0	0	0	0	0	0	0	0	0	0	0	0	0	0	0	0	0	0	0	0	0	0	0	0	0	0	0	0	0
Eukaryota	dropped	dropped	dropped	dropped	dropped	dropped	Zotu80	3	0	0	0	0	0	0	0	0	0	0	0	0	0	0	0	0	0	0	0	0	0	0	0	0	0	0	0	0	0	0	0	0	0	0	0	0	0	0	0	0	0
Eukaryota	dropped	dropped	dropped	dropped	dropped	dropped	Zotu91	5	0	0	0	0	0	0	0	0	0	0	0	0	0	0	0	0	0	0	0	0	0	0	0	0	0	0	0	0	0	0	0	0	0	0	0	0	0	0	0	0	0
Eukaryota	dropped	dropped	dropped	dropped	dropped	dropped	Zotu98	3	0	0	0	7777	0	0	0	0	0	0	0	0	0	0	0	0	0	0	0	0	0	0	0	0	0	0	0	0	0	0	0	0	0	0	0	0	0	0	0	0	0
Eukaryota	dropped	dropped	dropped	dropped	dropped	dropped	Zotu100	5	0	0	0	0	0	0	0	0	0	0	0	0	0	0	0	0	0	0	0	0	0	0	0	0	0	0	0	0	0	0	0	0	0	0	0	0	0	0	0	0	0
Eukaryota	dropped	dropped	dropped	dropped	dropped	dropped	Zotu132	5	0	0	0	0	0	0	0	0	0	0	0	0	0	0	0	0	0	0	0	0	0	0	0	0	0	0	0	0	0	0	0	0	0	0	0	0	0	0	0	0	0
Eukaryota	dropped	dropped	dropped	dropped	dropped	dropped	Zotu136	5	0	0	2082	0	0	0	0	0	0	0	0	0	0	0	0	0	0	0	0	0	0	0	0	0	0	0	0	0	0	0	0	0	0	17	0	0	0	0	0	0	0
Eukaryota	dropped	dropped	dropped	dropped	dropped	dropped	Zotu156	6	0	0	0	0	0	0	0	0	0	0	0	0	0	0	0	0	0	0	0	0	0	0	0	0	0	0	0	0	0	0	0	0	0	0	0	0	0	0	0	0	0
Eukaryota	dropped	dropped	dropped	dropped	dropped	dropped	Zotu171	5	0	0	0	0	0	0	0	0	0	0	0	0	0	0	0	0	0	0	0	0	0	0	0	0	0	0	0	0	0	0	0	0	0	0	0	0	0	0	0	0	0
Eukaryota	dropped	dropped	dropped	dropped	dropped	dropped	Zotu218	2	0	0	0	0	0	0	0	0	0	0	0	0	0	0	0	0	0	0	0	0	0	0	0	0	0	0	0	0	0	0	0	0	0	0	0	0	0	0	0	0	0
Eukaryota	dropped	dropped	dropped	dropped	dropped	dropped	Zotu226	4	0	0	0	0	0	0	0	0	0	0	0	0	0	0	0	0	0	0	0	0	0	0	0	0	0	0	0	0	0	0	0	0	0	0	0	0	0	0	0	0	0
Eukaryota	dropped	dropped	dropped	dropped	dropped	dropped	Zotu227	3	0	0	0	0	0	0	0	0	0	0	0	0	0	0	0	0	0	0	0	0	0	0	0	0	0	0	0	0	0	0	0	0	0	0	0	0	0	0	0	0	0
Eukaryota	dropped	dropped	dropped	dropped	dropped	dropped	Zotu254	7	0	0	0	0	0	0	0	0	0	0	0	0	0	0	0	0	0	0	0	0	0	0	0	0	0	0	0	0	0	0	0	0	0	0	0	0	0	0	0	0	0
Eukaryota	dropped	dropped	dropped	dropped	dropped	dropped	Zotu273	3	0	0	0	0	0	0	0	0	0	0	0	0	0	0	0	0	0	0	0	0	0	0	0	0	0	0	0	0	0	0	0	0	0	0	0	0	0	0	0	0	0
Eukaryota	dropped	dropped	dropped	dropped	dropped	dropped	Zotu274	3	0	0	0	0	0	0	0	0	0	0	0	0	0	0	0	0	0	0	0	0	0	0	0	0	0	0	0	0	0	0	0	0	0	0	0	0	0	0	0	0	0
Eukaryota	dropped	dropped	dropped	dropped	dropped	dropped	Zotu280	3	0	0	0	0	0	0	0	0	0	0	0	0	0	0	0	0	0	0	0	0	0	0	0	0	0	0	0	0	0	0	0	0	0	0	0	0	0	0	0	0	0
Eukaryota	dropped	dropped	dropped	dropped	dropped	dropped	Zotu310	3	0	0	0	0	0	0	0	0	0	0	0	0	0	0	0	0	0	0	0	0	0	0	0	0	0	0	0	0	0	0	0	0	0	0	0	0	0	0	0	0	0
Eukaryota	dropped	dropped	dropped	dropped	dropped	dropped	Zotu352	3	0	0	0	0	0	0	0	0	0	0	0	0	0	0	0	0	0	0	0	0	0	0	0	0	0	0	0	0	0	0	0	0	0	0	0	0	0	0	0	0	0
Eukaryota	dropped	dropped	dropped	dropped	dropped	dropped	Zotu356	5	0	0	0	0	0	0	0	0	0	0	0	0	0	0	0	0	0	0	0	0	0	0	0	0	0	0	0	0	0	0	0	0	0	0	0	0	0	0	0	0	0
Eukaryota	dropped	dropped	dropped	dropped	dropped	dropped	Zotu363	3	0	0	0	0	0	0	0	0	0	0	0	0	0	0	0	0	0	0	0	0	0	0	0	0	0	0	0	0	0	0	0	0	0	0	0	0	0	0	0	0	0
Eukaryota	dropped	dropped	dropped	dropped	dropped	dropped	Zotu365	3	0	0	0	0	0	0	0	0	0	0	0	0	0	0	0	0	0	0	0	0	0	0	0	0	0	0	0	0	0	0	0	0	0	0	0	0	0	0	0	0	0
Eukaryota	dropped	dropped	dropped	dropped	dropped	dropped	Zotu368	4	0	0	0	0	0	0	0	0	0	0	0	0	0	0	0	0	0	0	0	0	0	0	0	0	0	0	0	0	0	0	0	0	0	0	0	0	0	0	0	0	0
Eukaryota	dropped	dropped	dropped	dropped	dropped	dropped	Zotu396	6	0	0	0	0	0	0	0	0	0	0	0	0	0	0	0	0	0	0	0	0	0	0	0	0	0	0	0	0	0	0	0	0	0	0	0	0	0	0	0	0	0
Eukaryota	dropped	dropped	dropped	dropped	dropped	dropped	Zotu397	3	0	0	0	0	0	0	0	0	0	0	0	0	0	0	0	0	0	0	0	0	0	0	0	0	0	0	0	0	0	0	0	0	0	0	0	0	0	0	0	0	0
Eukaryota	dropped	dropped	dropped	dropped	dropped	dropped	Zotu420	6	0	0	0	5	0	0	0	0	0	0	0	0	0	0	0	0	1	0	474	0	0	0	0	0	0	0	0	0	0	0	0	0	0	0	0	0	0	0	0	0	0
Eukaryota	dropped	dropped	dropped	dropped	dropped	dropped	Zotu432	4	0	0	0	0	0	0	0	0	0	0	0	0	0	0	0	0	0	0	0	0	0	0	0	0	0	0	0	0	0	0	0	0	0	0	0	0	0	0	0	0	0
Eukaryota	dropped	dropped	dropped	dropped	dropped	dropped	Zotu448	6	0	0	0	0	0	0	0	0	0	0	0	0	0	0	0	0	0	0	0	0	0	0	0	0	0	0	0	0	0	0	0	0	0	0	0	0	0	0	0	0	0
Eukaryota	dropped	dropped	dropped	dropped	dropped	dropped	Zotu455	5	0	0	0	0	0	0	0	0	0	0	0	0	0	0	0	0	0	0	0	0	0	0	0	0	0	0	0	0	0	0	0	0	0	0	0	0	0	0	0	0	0
Eukaryota	dropped	dropped	dropped	dropped	dropped	dropped	Zotu540	8	0	0	0	0	0	0	0	0	0	0	0	0	0	0	0	0	0	0	0	0	0	0	0	0	0	0	0	0	0	0	0	0	0	0	0	0	0	0	0	0	0
Eukaryota	dropped	dropped	dropped	dropped	dropped	dropped	Zotu549	4	0	0	0	0	0	0	0	0	0	0	0	0	0	0	0	0	0	0	0	0	0	0	0	0	0	0	0	0	0	0	0	0	0	0	0	0	0	0	0	0	0
Eukaryota	dropped	dropped	dropped	dropped	dropped	dropped	Zotu573	6	0	0	0	0	0	0	0	0	0	0	0	0	0	0	0	0	0	0	0	0	0	0	0	0	0	0	0	0	0	0	0	0	0	0	0	0	0	0	0	0	0
Eukaryota	dropped	dropped	dropped	dropped	dropped	dropped	Zotu689	6	0	0	0	0	0	0	0	0	0	0	0	0	0	0	0	0	0	0	0	0	1	0	0	0	0	0	0	0	1215	0	0	0	0	0	1	0	0	0	2	0	0
Eukaryota	dropped	dropped	dropped	dropped	dropped	dropped	Zotu743	6	0	0	0	0	0	0	0	0	0	0	0	0	0	0	0	0	0	0	0	0	0	0	0	0	0	0	0	0	0	0	0	0	0	0	0	0	0	0	0	0	0
Eukaryota	dropped	dropped	dropped	dropped	dropped	dropped	Zotu770	2	0	0	0	0	0	0	0	0	0	0	0	0	0	0	0	0	0	0	0	0	0	0	0	0	0	0	0	0	0	0	0	0	0	0	0	0	0	0	0	0	0
Eukaryota	dropped	dropped	dropped	dropped	dropped	dropped	Zotu885	7	0	0	0	0	0	0	0	0	0	0	0	0	0	0	0	0	0	0	0	0	0	0	0	0	0	0	0	0	0	0	0	0	0	0	0	0	0	0	0	0	0
Eukaryota	dropped	dropped	dropped	dropped	dropped	dropped	Zotu917	7	0	0	0	0	0	0	0	0	0	0	0	0	0	0	0	0	0	0	0	0	0	0	0	0	0	0	0	0	0	0	0	0	0	0	0	0	0	0	0	0	0
Eukaryota	dropped	dropped	dropped	dropped	dropped	dropped	Zotu921	6	0	0	0	0	0	0	0	0	0	0	0	0	0	0	0	0	0	0	0	0	0	0	0	0	0	0	0	0	0	0	0	0	0	0	0	0	0	0	0	0	0
Eukaryota	dropped	dropped	dropped	dropped	dropped	dropped	Zotu1169	4	0	0	0	0	0	0	0	0	0	0	0	0	0	0	0	0	0	0	0	0	0	0	0	0	0	0	0	0	0	0	0	0	0	0	0	0	0	0	0	0	0
Eukaryota	dropped	dropped	dropped	dropped	dropped	dropped	Zotu1218	3	0	0	0	0	0	0	0	0	0	0	0	0	0	0	0	0	0	0	0	0	0	0	0	0	0	0	0	0	0	0	0	0	0	0	0	0	0	0	0	0	0
Eukaryota	dropped	dropped	dropped	dropped	dropped	dropped	Zotu1281	3	0	0	0	0	0	0	0	0	0	0	0	0	0	0	0	0	0	0	0	0	0	0	0	0	0	0	0	0	0	0	0	0	0	0	0	0	0	0	0	0	0
Eukaryota	dropped	dropped	dropped	dropped	dropped	dropped	Zotu1305	4	0	0	0	0	0	0	0	0	0	0	0	0	0	0	0	0	0	0	0	0	0	0	0	0	0	0	0	0	0	0	0	0	0	0	0	0	0	0	0	0	0
Eukaryota	dropped	dropped	dropped	dropped	dropped	dropped	Zotu1315	3	0	0	0	0	0	0	0	0	0	0	0	0	0	0	0	0	0	0	0	0	0	0	0	0	0	0	0	0	0	0	0	0	0	0	0	0	0	0	0	0	0
Eukaryota	dropped	dropped	dropped	dropped	dropped	dropped	Zotu1362	2	0	0	0	0	0	0	0	0	0	0	0	0	0	0	0	0	0	0	0	0	0	0	0	0	0	0	0	0	0	0	0	0	0	0	0	0	0	0	0	0	0
Eukaryota	dropped	dropped	dropped	dropped	dropped	dropped	Zotu1738	3	0	0	0	0	0	0	0	0	0	0	0	0	0	0	0	0	0	0	0	0	0	0	0	0	0	0	0	0	0	0	0	0	0	0	0	0	0	0	0	0	0
Eukaryota	dropped	dropped	dropped	dropped	dropped	dropped	Zotu1781	2	0	0	0	0	0	0	0	0	0	0	0	0	0	0	0	0	0	0	0	0	0	0	0	0	0	0	0	0	0	0	0	0	0	0	0	0	0	0	0	0	0
Eukaryota	dropped	dropped	dropped	dropped	dropped	dropped	Zotu1830	3	0	0	0	0	0	0	0	0	0	0	0	0	0	0	0	0	0	0	0	0	0	0	0	0	0	0	0	0	0	0	0	0	0	0	0	0	0	0	0	0	0
Eukaryota	dropped	dropped	dropped	dropped	dropped	dropped	Zotu1875	2	0	0	0	0	0	0	0	0	0	0	0	0	0	0	0	0	0	0	0	0	0	0	0	0	0	0	0	0	0	0	0	0	0	0	0	0	0	0	0	0	0
Eukaryota	dropped	dropped	dropped	dropped	dropped	dropped	Zotu1899	7	0	0	0	0	0	0	0	0	0	0	0	0	0	0	0	0	0	0	0	0	0	0	0	0	0	0	0	0	0	0	0	0	0	0	0	0	0	0	0	0	0
Eukaryota	dropped	dropped	dropped	dropped	dropped	dropped	Zotu2038	5	0	0	0	6	0	0	0	0	0	0	0	0	0	0	0	0	0	0	0	0	0	0	0	0	0	0	0	0	0	0	0	0	0	0	0	0	0	0	0	0	0
Eukaryota	dropped	dropped	dropped	dropped	dropped	dropped	Zotu2130	3	0	0	0	0	0	0	0	0	0	0	0	0	0	0	0	0	0	0	13	0	0	0	0	0	0	0	0	0	0	0	0	0	0	0	0	0	0	0	0	0	0
Eukaryota	dropped	dropped	dropped	dropped	dropped	dropped	Zotu2652	4	0	0	0	0	0	0	0	0	0	0	0	0	0	0	0	0	0	0	0	0	0	0	0	0	0	0	0	0	0	0	0	0	0	0	0	0	0	0	0	0	0
Eukaryota	Mollusca	Bivalvia	Cardiida	dropped	dropped	dropped	Zotu1547	7	0	0	0	0	0	0	0	0	0	0	0	0	0	0	0	0	0	0	0	0	0	0	0	0	0	0	0	0	0	0	0	0	0	0	0	0	0	0	0	0	0
Eukaryota	Mollusca	Bivalvia	Limoida	Limidae	Limaria	Limaria hians	Zotu2366	1	0	0	0	0	0	0	0	0	0	0	0	0	0	0	0	0	0	0	0	0	0	0	0	0	0	0	0	0	0	0	0	0	0	0	0	0	0	0	0	0	0
Eukaryota	Mollusca	Bivalvia	Myida	Teredinidae	dropped	dropped	Zotu291	5	0	0	0	0	0	0	0	0	0	0	0	0	0	0	0	0	0	0	0	0	0	0	0	0	0	0	0	0	0	0	0	0	0	0	0	0	0	0	0	0	0
Eukaryota	Mollusca	Bivalvia	Myida	Teredinidae	dropped	dropped	Zotu650	5	0	0	0	0	0	0	0	0	0	0	0	0	0	0	0	0	0	0	0	0	0	0	0	0	0	0	0	0	0	0	0	0	0	0	0	0	0	0	0	0	0
Eukaryota	Mollusca	Bivalvia	Mytiloida	Mytilidae	dropped	dropped	Zotu2153	5	0	0	0	0	0	0	0	0	0	0	0	0	0	0	0	0	0	0	0	0	0	0	0	0	0	0	0	0	0	0	0	0	0	0	0	0	0	0	0	0	0
Eukaryota	Mollusca	Bivalvia	Pectinida	Pectinidae	dropped	dropped	Zotu923	5	0	0	0	0	0	0	0	0	0	0	0	0	0	0	0	0	0	0	0	0	0	0	0	0	0	0	0	0	0	0	0	0	0	0	0	0	0	0	0	0	0
Eukaryota	Mollusca	Bivalvia	Pectinida	Spondylidae	Spondylus	Spondylus sinensis	Zotu1119	2	0	0	0	0	0	0	0	0	0	0	0	0	0	0	0	0	0	0	0	0	0	0	0	0	0	0	0	0	0	0	0	0	0	0	0	0	0	0	0	0	0
Eukaryota	Mollusca	Bivalvia	Pectinida	Spondylidae	Spondylus	Spondylus sinensis	Zotu1420	2	0	0	0	0	0	0	0	0	0	0	0	0	0	0	0	0	0	0	0	0	0	0	0	0	0	0	0	0	0	0	0	0	0	0	0	0	0	0	0	0	0
Eukaryota	Mollusca	Gastropoda	Aplysiida	Aplysiidae	dropped	dropped	Zotu17	4	0	0	0	0	0	0	0	0	0	0	0	0	0	0	0	0	0	0	0	0	0	0	0	0	0	0	0	0	0	0	0	0	0	0	0	0	0	0	0	0	0
Eukaryota	Mollusca	Gastropoda	Cephalaspidea	Gastropteridae	Sagaminopteron	Sagaminopteron psychedelicum	Zotu67	1	0	0	0	0	0	0	0	0	0	0	0	0	0	0	0	0	0	0	0	0	0	0	0	0	0	0	0	0	0	0	0	0	0	0	0	0	0	0	0	0	0
Eukaryota	Mollusca	Gastropoda		dropped	dropped	dropped	Zotu8	4	0	0	0	0	0	0	0	0	0	0	0	0	0	0	0	0	0	0	0	0	0	0	0	0	0	0	0	0	0	0	0	0	0	0	0	0	0	0	0	0	0
Eukaryota	Oomycota		Lagenidiales	Haliphthoraceae	dropped	dropped	Zotu1688	3	0	0	0	0	0	0	0	0	0	0	0	0	0	0	0	0	0	0	0	0	0	0	0	0	0	0	0	0	0	0	0	0	0	0	0	0	0	0	0	0	0
Eukaryota	Porifera	Demospongiae	Clionaida	Clionaidae	Cliona	Cliona sp. SI06x31	Zotu1797	1	0	0	0	0	0	0	0	0	0	0	0	0	0	0	0	0	0	0	0	0	0	0	0	0	0	0	0	0	0	0	0	0	0	0	0	0	0	0	0	0	0
Eukaryota	Porifera	Demospongiae	Clionaida	dropped	dropped	dropped	Zotu548	5	0	0	0	0	0	0	0	0	0	0	1	0	0	0	0	0	0	0	0	0	0	0	0	0	0	0	0	0	0	0	0	0	0	0	0	0	0	0	0	0	0
Eukaryota	Porifera	Demospongiae	Dictyoceratida	dropped	dropped	dropped	Zotu90	10	1	0	0	0	0	0	0	0	0	0	0	0	0	0	0	0	0	0	0	0	0	0	0	0	0	0	0	0	0	0	0	0	0	0	0	0	0	0	0	0	0
Eukaryota	Porifera	Demospongiae	Dictyoceratida	dropped	dropped	dropped	Zotu882	7	0	0	0	0	0	0	0	0	0	0	0	0	0	0	0	0	0	0	0	0	0	0	0	0	0	0	0	0	0	0	0	0	0	0	0	0	0	0	0	0	0
Eukaryota	Porifera	Demospongiae	Dictyoceratida	Irciniidae	Sarcotragus	Sarcotragus spinosulus	Zotu2658	1	0	0	0	0	0	0	0	0	0	0	0	0	0	0	0	0	0	0	0	0	0	0	0	0	0	0	0	0	0	0	0	0	0	0	0	0	0	0	0	0	0
Eukaryota	Porifera	Demospongiae	Dictyoceratida	Spongiidae	Spongia	Spongia tubulifera	Zotu905	1	0	0	0	0	0	0	0	0	0	0	0	0	0	0	0	0	0	0	0	0	0	0	0	0	0	0	0	0	0	0	0	0	0	0	0	0	0	0	0	0	0
Eukaryota	Porifera	Demospongiae	Dictyoceratida	Thorectidae	Petrosaspongia	Petrosaspongia nigra	Zotu2598	2	0	0	0	0	0	0	0	0	0	0	0	0	0	0	0	0	0	0	0	0	0	0	0	0	0	0	0	0	0	0	0	0	0	0	0	0	0	0	0	0	0
Eukaryota	Porifera	Demospongiae	dropped	dropped	dropped	dropped	Zotu722	2	0	0	0	0	0	0	0	0	0	0	0	0	0	0	0	0	0	0	0	0	0	0	0	0	0	0	0	0	0	0	0	0	0	0	0	0	0	0	0	0	0
Eukaryota	Porifera	Demospongiae	dropped	dropped	dropped	dropped	Zotu723	9	0	0	0	0	0	0	0	0	0	0	0	0	0	0	0	0	0	0	0	0	0	0	0	0	0	0	0	0	0	0	0	0	0	0	0	0	0	0	0	0	0
Eukaryota	Porifera	Demospongiae	dropped	dropped	dropped	dropped	Zotu1146	4	0	0	0	0	0	0	0	0	0	0	0	0	0	0	0	0	0	0	0	0	0	0	0	0	0	0	0	0	0	0	0	0	0	0	0	0	0	0	0	0	0
Eukaryota	Porifera	Demospongiae	dropped	dropped	dropped	dropped	Zotu1208	9	0	0	0	0	0	0	0	0	0	0	0	0	0	0	0	0	0	0	0	0	0	0	0	0	0	0	0	0	0	0	0	0	0	0	0	0	0	0	0	0	0
Eukaryota	Porifera	Demospongiae	dropped	dropped	dropped	dropped	Zotu1311	9	0	0	0	0	0	0	0	0	0	0	0	0	0	0	0	0	0	0	0	0	0	0	0	0	0	0	0	0	0	0	0	0	0	0	0	0	0	0	0	0	0
Eukaryota	Porifera	Demospongiae	dropped	dropped	dropped	dropped	Zotu1550	2	0	0	0	0	0	0	0	0	0	0	0	0	0	0	0	0	0	0	0	0	0	0	0	0	0	0	0	0	0	0	0	0	0	0	0	0	0	0	0	0	0
Eukaryota	Porifera	Demospongiae	Haplosclerida	Chalinidae	Haliclona	dropped	Zotu1990	2	0	0	0	0	0	0	0	0	0	0	0	0	0	0	0	0	0	0	0	0	0	0	0	0	0	0	0	0	0	0	0	0	0	0	0	0	0	0	0	0	0
Eukaryota	Porifera	Demospongiae	Haplosclerida	Chalinidae	Haliclona	dropped	Zotu2009	2	0	0	0	0	0	0	0	0	0	0	0	0	0	0	0	0	0	0	0	0	0	0	0	0	0	0	0	0	0	0	0	0	0	0	0	0	0	0	0	0	0
Eukaryota	Porifera	Demospongiae	Haplosclerida	Chalinidae	Haliclona	Haliclona mucifibrosa	Zotu1152	1	0	0	0	0	0	0	0	0	0	0	0	0	0	0	0	0	0	0	0	0	0	0	0	0	0	0	0	0	0	0	0	0	0	0	0	0	0	0	0	0	0
Eukaryota	Porifera	Demospongiae	Spongillida	Spongillidae	Ephydatia	dropped	Zotu614	2	0	163	0	0	0	0	0	0	0	0	0	0	0	0	0	0	0	0	0	0	0	0	0	0	0	0	0	3	0	0	0	0	0	0	0	0	0	49	0	0	0
Eukaryota	Rhodophyta	Florideophyceae	Ceramiales	Ceramiaceae	Antithamnionella	dropped	Zotu1782	2	0	0	0	0	0	0	0	0	0	0	0	0	0	0	0	0	0	0	0	0	0	0	0	0	0	0	0	0	0	0	0	0	0	0	0	0	0	0	0	0	0
Eukaryota	Rhodophyta	Florideophyceae	Ceramiales	Rhodomelaceae	dropped	dropped	Zotu1209	6	0	0	0	0	0	0	0	0	0	0	0	0	0	0	0	0	0	0	0	0	0	0	0	0	0	0	0	0	0	0	0	0	0	0	0	0	0	0	0	0	0
Eukaryota	Rhodophyta	Florideophyceae	Ceramiales	Rhodomelaceae	dropped	dropped	Zotu1494	10	0	0	0	0	0	0	0	0	0	0	0	0	0	0	0	0	0	0	0	0	0	0	0	0	0	0	0	0	0	0	0	0	0	0	0	0	0	0	0	0	0
Eukaryota	Rhodophyta	Florideophyceae	Ceramiales	Rhodomelaceae	dropped	dropped	Zotu2563	8	0	0	0	0	0	0	0	0	0	0	0	0	0	0	0	0	0	0	0	0	0	0	0	0	0	0	0	0	0	0	0	0	0	0	0	0	0	0	0	0	0
Eukaryota	Rhodophyta	Florideophyceae	Ceramiales	Rhodomelaceae	dropped	dropped	Zotu2730	9	0	0	0	0	0	0	0	0	0	0	0	0	0	0	0	0	0	0	0	0	0	0	0	0	0	0	0	0	0	0	0	0	0	0	0	0	0	0	0	0	0
Eukaryota	Rhodophyta	Florideophyceae	Corallinales	dropped	dropped	dropped	Zotu2247	3	0	0	0	0	0	0	0	0	0	0	0	0	0	0	0	0	0	0	0	0	0	0	0	0	0	0	0	0	0	0	0	0	0	0	0	0	0	0	0	0	0
Eukaryota	Rhodophyta	Florideophyceae	Gigartinales	Peyssonneliaceae	Peyssonnelia	dropped	Zotu842	2	0	0	0	0	0	0	0	0	0	0	0	0	0	0	0	0	0	0	0	0	0	0	0	0	0	0	0	0	0	0	0	0	0	0	0	0	0	0	0	0	0
Eukaryota	Rhodophyta	Florideophyceae	Gigartinales	Peyssonneliaceae	Peyssonnelia	dropped	Zotu1959	7	0	0	0	0	0	0	0	0	0	0	0	0	0	0	0	0	0	0	0	0	0	0	0	0	0	0	0	0	0	0	0	0	0	0	0	0	0	0	0	0	0
Eukaryota	Rhodophyta	Florideophyceae	Gigartinales	Peyssonneliaceae	Peyssonnelia	dropped	Zotu2752	7	0	0	0	0	0	0	0	0	0	0	0	0	0	0	0	0	0	0	0	0	0	0	0	0	0	0	0	0	0	0	0	0	0	0	0	0	0	0	0	0	0
Eukaryota	Sipuncula		Phascolosomatiformes	Phascolosomatidae	Apionsoma	Apionsoma misakianum	Zotu206	1	0	0	0	0	0	0	0	0	0	0	0	0	0	0	0	0	0	0	0	0	0	0	0	0	0	0	0	0	0	0	0	0	0	0	0	0	0	0	0	0	0
Eukaryota	Streptophyta	Magnoliopsida	Brassicales	Brassicaceae	Brassica	Brassica rapa	Zotu47	1	1	0	0	11709	0	0	0	0	0	0	0	0	0	0	0	0	0	0	0	0	0	0	0	0	0	0	0	0	0	0	0	0	0	0	0	0	0	0	0	0	0
Eukaryota		Acantharea	Arthracanthida	dropped	dropped	dropped	Zotu1342	4	0	0	0	0	0	0	0	0	0	0	0	0	0	0	0	0	0	0	0	0	0	0	0	0	0	0	0	0	0	0	0	0	0	0	0	0	0	0	0	0	0
Eukaryota		Bigyra	Bicosoecida		Caecitellus	Caecitellus parvulus	Zotu1886	1	0	0	0	0	0	0	0	0	0	0	0	0	0	0	0	0	0	0	0	0	0	0	0	0	0	0	0	0	0	0	0	0	0	0	0	0	0	0	0	0	0
Eukaryota		Bigyra	Opalinata	Blastocystidae	Blastocystis	Blastocystis sp.	Zotu158	1	1249	0	546	0	1	0	0	0	0	0	0	0	0	0	0	0	0	0	0	0	0	0	0	0	0	0	0	0	0	0	0	0	0	0	0	0	0	0	0	0	0
Eukaryota		Bigyra	Opalinata	Blastocystidae	Blastocystis	Blastocystis sp.	Zotu361	1	0	0	496	0	0	0	0	0	0	0	0	0	0	0	0	0	0	0	0	0	0	0	0	0	0	0	0	0	0	0	0	0	0	0	0	0	0	0	0	0	0
Eukaryota		Bigyra	Thraustochytrida	Thraustochytriaceae	dropped	dropped	Zotu2487	7	0	0	0	0	0	0	0	0	0	0	0	0	0	0	0	0	0	0	0	0	0	0	0	0	0	0	0	0	0	0	0	0	0	0	0	0	0	0	0	0	0
Eukaryota		Bigyra	Thraustochytrida	Thraustochytriaceae	Labyrinthuloides	Labyrinthuloides minuta	Zotu896	1	0	0	0	0	0	0	0	0	0	0	0	0	0	0	0	0	0	0	0	0	0	0	0	0	0	0	0	0	0	0	0	0	0	0	0	0	0	0	0	0	0
Eukaryota		Bigyra	Thraustochytrida	Thraustochytriaceae	Thraustochytrium	dropped	Zotu2327	2	0	0	0	0	0	0	0	0	0	0	0	0	0	0	0	0	0	0	0	0	0	0	0	0	0	0	0	0	0	0	0	0	0	0	0	0	0	0	0	0	0
Eukaryota		Bigyra	Thraustochytrida	Thraustochytriaceae	Thraustochytrium	Thraustochytrium sp. HK10	Zotu1639	1	0	0	0	0	0	0	0	0	0	0	0	0	0	0	0	0	0	0	0	0	0	0	0	0	0	0	0	0	0	0	0	0	0	0	0	0	0	0	0	0	0
Eukaryota		Bigyra	Thraustochytrida	Thraustochytriaceae	Thraustochytrium	Thraustochytrium sp. HK5	Zotu990	1	0	0	0	0	0	0	0	0	0	0	0	0	0	0	0	0	0	0	0	0	0	0	0	0	0	0	0	0	0	0	0	0	0	0	0	0	0	0	0	0	0
Eukaryota		Bigyra	Thraustochytrida	Thraustochytriaceae	Thraustochytrium	Thraustochytrium sp. HK5	Zotu2036	1	0	0	0	0	0	0	0	0	0	0	0	0	0	0	0	0	0	0	0	0	0	0	0	0	0	0	0	0	0	0	0	0	0	0	0	0	0	0	0	0	0
Eukaryota		Dinophyceae	dropped	dropped	dropped	dropped	Zotu377	3	0	0	0	0	0	0	0	0	0	0	0	0	0	0	0	0	0	0	0	0	0	0	0	0	0	0	0	0	0	0	0	0	0	0	0	0	0	0	0	0	0
Eukaryota		Dinophyceae	dropped	dropped	dropped	dropped	Zotu926	3	0	0	0	0	0	0	0	0	0	0	0	0	0	0	0	0	0	0	0	0	0	0	0	0	0	0	0	0	0	0	0	0	0	0	0	0	0	0	0	0	0
Eukaryota		Dinophyceae	dropped	dropped	dropped	dropped	Zotu1644	3	0	0	0	0	0	0	0	0	0	0	0	0	0	0	0	0	0	0	0	0	0	0	0	0	0	0	0	0	0	0	0	0	0	0	0	0	0	0	0	0	0
Eukaryota		Dinophyceae	Gonyaulacales	Gonyaulacaceae	Gonyaulax	Gonyaulax polygramma	Zotu1406	1	0	0	0	0	0	0	0	0	0	0	0	0	0	0	0	0	0	0	0	0	0	0	0	0	0	0	0	0	0	0	0	0	0	0	0	0	0	0	0	0	0
Eukaryota		Dinophyceae	Gonyaulacales	Gonyaulacaceae	Gonyaulax	Gonyaulax polygramma	Zotu1628	1	0	0	0	0	0	0	0	0	0	0	0	0	0	0	0	0	0	0	0	0	0	0	0	0	0	0	0	0	0	0	0	0	0	0	0	0	0	0	0	0	0
Eukaryota		Dinophyceae	Gonyaulacales	Gonyaulacaceae	Gonyaulax	Gonyaulax polygramma	Zotu2722	1	0	0	0	0	0	0	0	0	0	0	0	0	0	0	0	0	0	0	0	0	0	0	0	0	0	0	0	0	0	0	0	0	0	0	0	0	0	0	0	0	0
Eukaryota		Dinophyceae	Gymnodiniales	Ceratoperidiniaeceae	Pseliodinium	Pseliodinium pirum	Zotu82	1	0	0	0	0	0	0	0	0	0	0	0	0	0	0	0	0	0	0	0	0	0	0	0	0	0	0	0	0	0	0	0	0	0	0	0	0	0	0	0	0	0
Eukaryota		Dinophyceae	Gymnodiniales	Gymnodiniaceae	Gymnodinium	Gymnodinium catenatum	Zotu184	1	0	0	0	0	0	0	0	0	0	0	0	0	0	0	0	0	0	0	0	0	0	0	0	0	0	0	0	0	0	0	0	0	0	0	0	0	0	0	0	0	0
Eukaryota		Dinophyceae	Gymnodiniales	Gymnodiniaceae	Paragymnodinium	Paragymnodinium asymmetricum	Zotu571	1	0	0	0	0	0	0	0	0	0	0	0	0	0	0	0	0	0	0	0	0	0	0	0	0	0	0	0	0	0	0	0	0	0	0	0	0	0	0	0	0	0
Eukaryota		Dinophyceae	Gymnodiniales			uncultured Gymnodinium	Zotu2135	1	0	0	0	0	0	0	0	0	0	0	0	0	0	0	0	0	0	0	0	0	0	0	0	0	0	0	0	0	0	0	0	0	0	0	0	0	0	0	0	0	0
Eukaryota		Dinophyceae	Suessiales	Symbiodiniaceae	Cladocopium	Cladocopium sp. clade C	Zotu1511	1	0	0	0	0	0	0	0	0	0	0	0	0	0	0	0	0	0	0	3	0	0	0	0	0	0	0	0	0	2	0	0	0	0	0	1	0	0	0	101	16	5
Eukaryota		Dinophyceae	Suessiales	Symbiodiniaceae	dropped	dropped	Zotu84	7	0	0	0	0	962	120	43	20	23	10	72	5	9	90	6	14	17	425	5621	49	24	24	19	8	648	255	653	163	2460	2226	8649	8	443	548	1232	48	72	427	7546	829	638
Eukaryota		Dinophyceae	Suessiales	Symbiodiniaceae	Symbiodinium	dropped	Zotu677	3	0	0	0	0	9	5	0	2	1	0	1	1	3	4	0	0	4	1	0	0	0	0	1	0	0	0	32	0	1	0	60	18	17	6	137	0	0	0	85	4	0
Eukaryota		Dinophyceae	Suessiales	Symbiodiniaceae	Symbiodinium	dropped	Zotu696	2	0	0	0	0	1	1	0	0	0	0	0	0	2	4	0	1	0	0	0	0	0	0	0	0	0	0	0	0	0	0	2	1	0	1	199	5	0	0	23	0	0
Eukaryota		Dinophyceae	Suessiales	Symbiodiniaceae	Symbiodinium	dropped	Zotu822	2	0	0	0	0	1	1	0	0	0	0	0	0	0	1	0	1	2	0	0	0	1	0	1	0	0	0	0	0	0	0	0	0	0	2	160	0	0	0	15	0	0
Eukaryota		Dinophyceae	Suessiales	Symbiodiniaceae	Symbiodinium	dropped	Zotu916	5	0	0	0	0	0	0	0	0	0	0	0	0	0	0	0	0	0	0	0	0	0	1	1	0	0	1	0	0	2	0	202	0	5	0	0	0	0	0	0	0	20
Eukaryota		Dinophyceae	Suessiales	Symbiodiniaceae	Symbiodinium	dropped	Zotu1066	2	0	0	0	0	1	0	0	0	1	0	0	0	0	0	0	1	2	0	0	0	0	0	0	0	0	0	0	0	0	0	74	0	0	1	13	0	2	0	2	0	0
Eukaryota		Dinophyceae	Suessiales	Symbiodiniaceae	Symbiodinium	dropped	Zotu1578	2	0	0	0	0	2	0	0	0	1	0	0	1	2	3	0	2	0	0	0	0	0	0	0	0	0	0	0	0	0	0	0	0	6	0	0	0	0	0	0	0	0
Eukaryota		Dinophyceae	Suessiales	Symbiodiniaceae	Symbiodinium	dropped	Zotu1756	7	0	0	0	0	0	0	0	0	0	0	0	0	0	0	0	0	0	0	4	0	0	0	0	0	0	0	0	0	0	0	0	0	0	0	0	0	0	0	0	0	0
Eukaryota		Dinophyceae	Suessiales	Symbiodiniaceae	Symbiodinium	dropped	Zotu2073	2	0	0	0	0	0	0	0	0	0	0	0	0	0	0	0	0	0	0	0	0	0	0	0	0	0	0	0	0	0	0	0	0	0	0	1	0	0	0	0	0	0
Eukaryota		Dinophyceae	Suessiales	Symbiodiniaceae	Symbiodinium	dropped	Zotu2131	2	0	0	0	0	1	0	0	0	1	1	0	0	0	0	0	0	0	0	0	0	0	0	0	0	0	0	0	5	0	0	0	0	0	0	0	0	0	0	47	15	0
Eukaryota		Dinophyceae	Suessiales	Symbiodiniaceae	Symbiodinium	Symbiodinium sp. clade E	Zotu1978	1	0	0	0	0	0	1	0	0	0	0	1	0	0	0	0	0	1	0	0	0	0	0	1	0	0	0	0	0	0	0	0	0	0	0	28	1	0	0	0	0	0
Eukaryota		Dinophyceae	Thoracosphaerales	Thoracosphaeraceae	Scrippsiella	dropped	Zotu503	3	0	0	0	0	0	0	0	0	0	0	0	0	0	0	0	0	0	0	0	0	0	0	0	0	0	0	0	0	0	0	0	0	0	0	0	0	0	0	0	0	0
Eukaryota		dropped	dropped	dropped	dropped	dropped	Zotu61	3	0	0	0	0	0	0	0	0	0	0	0	0	0	0	0	0	0	0	0	0	0	0	0	0	0	0	0	0	0	0	0	0	0	0	0	0	0	0	0	0	0
Eukaryota		dropped	dropped	dropped	dropped	dropped	Zotu64	4	0	0	0	0	0	0	0	0	0	0	0	0	0	0	0	0	0	0	0	0	0	0	0	0	0	0	0	0	0	0	0	0	0	0	0	0	0	0	0	0	0
Eukaryota		dropped	dropped	dropped	dropped	dropped	Zotu97	3	0	0	0	0	0	0	0	0	0	0	0	0	0	0	0	0	0	0	0	0	0	0	0	0	0	0	0	0	0	0	0	0	0	0	0	0	0	0	0	0	0
Eukaryota		dropped	dropped	dropped	dropped	dropped	Zotu101	4	0	0	0	0	0	0	0	0	0	0	0	0	0	0	0	0	0	0	0	0	0	0	0	0	0	0	0	0	0	0	0	0	0	0	0	0	0	0	0	0	0
Eukaryota		dropped	dropped	dropped	dropped	dropped	Zotu110	4	0	0	0	0	0	0	0	0	0	0	0	0	0	0	0	0	0	0	0	0	0	0	0	0	0	0	0	0	0	0	0	0	0	0	0	0	0	0	0	0	0
Eukaryota		dropped	dropped	dropped	dropped	dropped	Zotu134	2	0	0	0	0	0	0	0	0	0	0	0	0	0	0	0	0	0	0	0	0	0	0	0	0	0	0	0	0	0	0	0	0	0	0	0	0	0	0	0	0	0
Eukaryota		dropped	dropped	dropped	dropped	dropped	Zotu145	4	0	0	0	0	0	0	0	0	0	0	0	0	0	0	0	0	0	0	0	0	0	0	0	0	0	0	0	0	0	0	0	0	0	0	0	0	0	0	0	0	0
Eukaryota		dropped	dropped	dropped	dropped	dropped	Zotu189	3	0	0	0	0	0	0	0	0	0	0	0	0	0	0	0	0	0	0	0	0	0	0	0	0	0	0	0	0	0	0	0	0	0	0	0	0	0	0	0	0	0
Eukaryota		dropped	dropped	dropped	dropped	dropped	Zotu213	5	0	0	0	0	0	0	0	0	0	0	0	0	0	0	0	0	0	0	0	0	0	0	0	0	0	0	0	0	0	0	0	0	0	0	0	0	0	0	0	0	0
Eukaryota		dropped	dropped	dropped	dropped	dropped	Zotu229	5	0	0	0	0	0	0	0	0	0	0	0	0	0	0	0	0	0	0	0	0	0	0	0	0	0	0	0	0	0	0	0	0	0	0	0	0	0	0	0	0	0
Eukaryota		dropped	dropped	dropped	dropped	dropped	Zotu236	2	0	0	0	0	0	0	0	0	0	0	0	0	0	0	0	0	0	0	0	0	0	0	0	0	0	0	0	0	0	0	0	0	0	0	0	0	0	0	0	0	0
Eukaryota		dropped	dropped	dropped	dropped	dropped	Zotu242	2	0	0	0	0	0	0	0	0	0	0	0	0	0	0	0	0	0	0	0	0	0	0	0	0	0	0	0	0	0	0	0	0	0	0	0	0	0	0	0	0	0
Eukaryota		dropped	dropped	dropped	dropped	dropped	Zotu275	4	0	0	0	0	0	0	0	0	0	0	0	0	0	0	0	0	0	0	0	0	0	0	0	0	0	0	0	0	0	0	0	0	0	0	0	0	0	0	0	0	0
Eukaryota		dropped	dropped	dropped	dropped	dropped	Zotu314	3	0	0	0	0	0	0	0	0	0	0	0	0	0	0	0	0	0	0	0	0	0	0	0	0	0	0	0	0	0	0	0	0	0	0	0	0	0	0	0	0	0
Eukaryota		dropped	dropped	dropped	dropped	dropped	Zotu316	6	0	0	0	0	0	0	0	0	0	0	0	0	0	0	0	0	0	0	0	0	0	0	0	0	0	0	0	0	0	0	0	0	0	0	0	0	0	0	0	0	0
Eukaryota		dropped	dropped	dropped	dropped	dropped	Zotu398	2	0	0	0	0	0	0	0	0	0	0	0	0	0	0	0	0	0	0	0	0	0	0	0	0	0	0	0	0	0	0	0	0	0	0	0	0	0	0	0	0	0
Eukaryota		dropped	dropped	dropped	dropped	dropped	Zotu404	4	0	0	0	0	0	0	0	0	0	0	0	0	0	0	0	0	0	0	0	0	0	0	0	0	0	0	0	0	0	0	0	0	0	0	0	0	0	0	0	0	0
Eukaryota		dropped	dropped	dropped	dropped	dropped	Zotu414	5	0	0	0	0	0	0	0	0	0	0	0	0	0	0	0	0	0	0	0	0	0	0	0	0	0	0	0	0	0	0	0	0	0	0	0	0	0	0	0	0	0
Eukaryota		dropped	dropped	dropped	dropped	dropped	Zotu417	3	0	0	0	0	0	0	0	0	0	0	0	0	0	0	0	0	0	0	0	0	0	0	0	0	0	0	0	0	0	0	0	0	0	0	0	0	0	0	0	0	0
Eukaryota		dropped	dropped	dropped	dropped	dropped	Zotu435	3	0	0	0	0	0	0	0	0	0	0	0	0	0	0	0	0	0	0	0	0	0	0	0	0	0	0	0	0	0	0	0	0	0	0	0	0	0	0	0	0	0
Eukaryota		dropped	dropped	dropped	dropped	dropped	Zotu439	6	0	0	0	0	0	0	0	0	0	0	0	0	0	0	0	0	0	0	0	0	0	0	0	0	0	0	0	0	0	0	0	0	0	0	0	0	0	0	0	0	0
Eukaryota		dropped	dropped	dropped	dropped	dropped	Zotu479	3	0	0	0	0	0	0	0	0	0	0	0	0	0	0	0	0	0	0	0	0	0	0	0	0	0	0	0	0	0	0	0	0	0	0	0	0	0	0	0	0	0
Eukaryota		dropped	dropped	dropped	dropped	dropped	Zotu486	3	0	0	0	0	0	0	0	0	0	0	0	0	0	0	0	0	0	0	0	0	0	0	0	0	0	0	0	0	0	0	0	0	0	0	0	0	0	0	0	0	0
Eukaryota		dropped	dropped	dropped	dropped	dropped	Zotu559	3	0	0	0	0	0	0	0	0	0	0	0	0	0	0	0	0	0	0	0	0	0	0	0	0	0	0	0	0	0	0	0	0	0	0	0	0	0	0	0	0	0
Eukaryota		dropped	dropped	dropped	dropped	dropped	Zotu729	3	0	0	0	0	0	0	0	0	0	0	0	0	0	0	0	0	0	0	0	0	0	0	0	0	0	0	0	0	0	0	0	0	0	0	0	0	0	0	0	0	0
Eukaryota		dropped	dropped	dropped	dropped	dropped	Zotu852	3	0	0	0	0	0	0	0	0	0	0	0	0	0	0	0	0	0	0	0	0	0	0	0	0	0	0	0	0	0	0	0	0	0	0	0	0	0	0	0	0	0
Eukaryota		dropped	dropped	dropped	dropped	dropped	Zotu912	5	0	0	0	0	0	0	0	0	0	0	0	0	0	0	0	0	0	0	0	0	0	0	0	0	0	0	0	0	0	0	0	0	0	0	0	0	0	0	0	0	0
Eukaryota		dropped	dropped	dropped	dropped	dropped	Zotu977	5	0	0	0	0	0	0	0	0	0	0	0	0	0	0	0	0	0	0	0	0	0	0	0	0	0	0	0	0	0	0	0	0	0	0	0	0	0	0	0	0	0
Eukaryota		dropped	dropped	dropped	dropped	dropped	Zotu1021	4	0	0	0	0	0	0	0	0	0	0	0	0	0	0	0	0	0	0	0	0	0	0	0	0	0	0	0	0	0	0	0	0	0	0	0	0	0	0	0	0	0
Eukaryota		dropped	dropped	dropped	dropped	dropped	Zotu1125	2	0	0	0	0	0	0	0	0	0	0	0	0	0	0	0	0	0	0	0	0	0	0	0	0	0	0	0	0	0	0	0	0	0	0	0	0	0	0	0	0	0
Eukaryota		dropped	dropped	dropped	dropped	dropped	Zotu1167	4	0	0	0	0	0	0	0	0	0	0	0	0	0	0	0	0	0	0	0	0	0	0	0	0	0	0	0	0	0	0	0	0	0	0	0	0	0	0	0	0	0
Eukaryota		dropped	dropped	dropped	dropped	dropped	Zotu1241	3	0	0	0	0	0	0	0	0	0	0	0	0	0	0	0	0	0	0	0	0	0	0	0	0	0	0	0	0	0	0	0	0	0	0	0	0	0	0	0	0	0
Eukaryota		dropped	dropped	dropped	dropped	dropped	Zotu1402	3	0	0	0	0	0	0	0	0	0	0	0	0	0	0	0	0	0	0	0	0	0	0	0	0	0	0	0	0	0	0	0	0	0	0	0	0	0	0	0	0	0
Eukaryota		dropped	dropped	dropped	dropped	dropped	Zotu1589	3	0	0	0	0	0	0	0	0	0	0	0	0	0	0	0	0	0	0	0	0	0	0	0	0	0	0	0	0	0	0	0	0	0	0	0	0	0	0	0	0	0
Eukaryota		dropped	dropped	dropped	dropped	dropped	Zotu1793	2	0	0	0	0	0	0	0	0	0	0	0	0	0	0	0	0	0	0	0	0	0	0	0	0	0	0	0	0	0	0	0	0	0	0	0	0	0	0	0	0	0
Eukaryota		dropped	dropped	dropped	dropped	dropped	Zotu1816	5	0	0	0	0	0	0	0	0	0	0	0	0	0	0	0	0	0	0	0	0	0	0	0	0	0	0	0	0	0	0	0	0	0	0	0	0	0	0	0	0	0
Eukaryota		dropped	dropped	dropped	dropped	dropped	Zotu1821	7	0	0	0	0	0	0	0	0	0	0	0	0	0	0	0	0	0	0	0	0	0	0	0	0	0	0	0	0	0	0	0	0	0	0	0	0	0	0	0	0	0
Eukaryota		Phaeophyceae	Dictyotales	Dictyotaceae	Dictyota	dropped	Zotu2468	5	0	0	0	0	0	0	0	0	0	0	0	0	0	0	0	0	0	0	0	0	0	0	0	0	0	0	0	0	0	0	0	0	0	0	0	0	0	0	0	0	0
Eukaryota						dropped	Zotu11	2	0	0	0	0	0	0	0	0	0	0	0	0	0	0	0	0	0	0	0	0	0	0	0	0	0	0	0	0	0	0	0	0	0	0	0	0	0	0	0	0	0
Eukaryota						dropped	Zotu45	3	0	0	0	0	0	0	0	0	0	0	0	0	0	0	0	0	0	0	0	0	0	0	0	0	0	0	0	0	0	0	0	0	0	0	0	0	0	0	0	0	0
Eukaryota						dropped	Zotu71	2	0	0	0	0	0	0	0	0	0	0	0	0	0	0	0	0	0	0	0	0	0	0	0	0	0	0	0	0	0	0	0	0	0	0	0	0	0	0	0	0	0
Eukaryota						dropped	Zotu77	2	0	0	0	0	0	0	0	0	0	0	0	0	0	0	0	0	0	0	0	0	0	0	0	0	0	0	0	0	0	0	0	0	0	0	0	0	0	0	0	0	0
Eukaryota						dropped	Zotu79	3	0	0	0	0	0	0	0	0	0	0	0	0	0	0	0	0	0	0	0	0	0	0	0	0	0	0	0	0	0	0	0	0	0	0	0	0	0	0	0	0	0
Eukaryota						dropped	Zotu126	2	0	0	0	0	0	0	0	0	0	0	0	0	0	0	0	0	0	0	0	0	0	0	0	0	0	0	0	0	0	0	0	0	0	0	0	0	0	0	0	0	0
Eukaryota						dropped	Zotu152	2	0	0	0	0	0	0	0	0	0	0	0	0	0	0	0	0	0	0	0	0	0	0	0	0	0	0	0	0	0	0	0	0	0	0	0	0	0	0	0	0	0
Eukaryota						dropped	Zotu154	2	0	0	0	0	0	0	0	0	0	0	0	0	0	0	0	0	0	0	0	0	0	0	0	0	0	0	0	0	0	0	0	0	0	0	0	0	0	0	0	0	0
Eukaryota						dropped	Zotu185	2	0	0	0	0	0	0	0	0	0	0	0	0	0	0	0	0	0	0	0	0	0	0	0	0	0	0	0	0	0	0	0	0	0	0	0	0	0	0	0	0	0
Eukaryota						dropped	Zotu200	2	0	0	0	0	0	0	0	0	0	0	0	0	0	0	0	0	0	0	0	0	0	0	0	0	0	0	0	0	0	0	0	0	0	0	0	0	0	0	0	0	0
Eukaryota						dropped	Zotu204	3	0	0	0	0	0	0	0	0	0	0	0	0	0	0	0	0	0	0	0	0	0	0	0	0	0	0	0	0	0	0	0	0	0	0	0	0	0	0	0	0	0
Eukaryota						dropped	Zotu214	3	0	0	0	0	0	0	0	0	0	0	0	0	0	0	0	0	0	0	0	0	0	0	0	0	0	0	0	0	0	0	0	0	0	0	0	0	0	0	0	0	0
Eukaryota						dropped	Zotu234	2	0	0	0	0	0	0	0	0	0	0	0	0	0	0	0	0	0	0	0	0	0	0	0	0	0	0	0	0	0	0	0	0	0	0	0	0	0	0	0	0	0
Eukaryota						dropped	Zotu278	2	0	0	0	0	0	0	0	0	0	0	0	0	0	0	0	0	0	0	0	0	0	0	0	0	0	0	0	0	0	0	0	0	0	0	0	0	0	0	0	0	0
Eukaryota						dropped	Zotu294	3	0	0	0	0	0	0	0	0	0	0	0	0	0	0	0	0	0	0	0	0	0	0	0	0	0	0	0	0	0	0	0	0	0	0	0	0	0	0	0	0	0
Eukaryota						dropped	Zotu312	3	0	0	0	0	0	0	0	0	0	0	0	0	0	0	0	0	0	0	0	0	0	0	0	0	0	0	0	0	0	0	0	0	0	0	0	0	0	0	0	0	0
Eukaryota						dropped	Zotu313	2	0	0	0	0	0	0	0	0	0	0	0	0	0	0	0	0	0	0	0	0	0	0	0	0	0	0	0	0	0	0	0	0	0	0	0	0	0	0	0	0	0
Eukaryota						dropped	Zotu323	2	0	0	0	0	0	0	0	0	0	0	0	0	0	0	0	0	0	0	0	0	0	0	0	0	0	0	0	0	0	0	0	0	0	0	0	0	0	0	0	0	0
Eukaryota						dropped	Zotu401	2	0	0	0	0	0	0	0	0	0	0	0	0	0	0	0	0	0	0	0	0	0	0	0	0	0	0	0	0	0	0	0	0	0	0	0	0	0	0	0	0	0
Eukaryota						dropped	Zotu422	2	0	0	0	0	0	0	0	0	0	0	0	0	0	0	0	0	0	0	0	0	0	0	0	0	0	0	0	0	0	0	0	0	0	0	0	0	0	0	0	0	0
Eukaryota						dropped	Zotu453	2	0	0	0	0	0	0	0	0	0	0	0	0	0	0	0	0	0	0	0	0	0	0	0	0	0	0	0	0	0	0	0	0	0	0	0	0	0	0	0	0	0
Eukaryota						dropped	Zotu468	2	0	0	0	0	0	0	0	0	0	0	0	0	0	0	0	0	0	0	0	0	0	0	0	0	0	0	0	0	0	0	0	0	0	0	0	0	0	0	0	0	0
Eukaryota						dropped	Zotu469	2	0	0	0	0	0	0	0	0	0	0	0	0	0	0	0	0	0	0	0	0	0	0	0	0	0	0	0	0	0	0	0	0	0	0	0	0	0	0	0	0	0
Eukaryota						dropped	Zotu587	3	0	0	0	0	0	0	0	0	0	0	0	0	0	0	0	0	0	0	0	0	0	0	0	0	0	0	0	0	0	0	0	0	0	0	0	0	0	0	0	0	0
Eukaryota						dropped	Zotu598	3	0	0	0	0	0	0	0	0	0	0	0	0	0	0	0	0	0	0	0	0	0	0	0	0	0	0	0	0	0	0	0	0	0	0	0	0	0	0	0	0	0
Eukaryota						dropped	Zotu632	2	0	0	0	0	0	0	0	0	0	0	0	0	0	0	0	0	0	0	0	0	0	0	0	0	0	0	0	0	0	0	0	0	0	0	0	0	0	0	0	0	0
Eukaryota						dropped	Zotu680	2	0	0	175	0	0	0	0	0	0	0	0	0	0	0	0	0	0	0	0	0	0	0	0	0	0	0	0	0	0	0	0	0	0	0	0	0	0	0	0	0	0
Eukaryota						dropped	Zotu738	2	0	0	0	0	0	0	0	0	0	0	0	0	0	0	0	0	0	0	0	0	0	0	0	0	0	0	0	0	0	0	0	0	0	0	0	0	0	0	0	0	0
Eukaryota						dropped	Zotu775	2	0	0	0	0	0	0	0	0	0	0	0	0	0	0	0	0	0	0	0	0	0	0	0	0	0	0	0	0	0	0	0	0	0	0	0	0	0	0	0	0	0
Eukaryota						dropped	Zotu788	2	0	0	0	0	0	0	0	0	0	0	0	0	0	0	0	0	0	0	0	0	0	0	0	0	0	0	0	0	0	0	0	0	0	0	0	0	0	0	0	0	0
Eukaryota						dropped	Zotu802	3	0	0	0	0	0	0	0	0	0	0	0	0	0	0	0	0	0	0	0	0	0	0	0	0	0	0	0	0	0	0	0	0	0	0	0	0	0	0	0	0	0
Eukaryota						dropped	Zotu880	2	0	0	0	0	0	0	0	0	0	0	0	0	0	0	0	0	0	0	0	0	0	0	0	0	0	0	0	0	0	0	0	0	0	0	0	0	0	0	0	0	0
Eukaryota						dropped	Zotu914	2	0	0	0	0	0	0	0	0	0	0	0	0	0	0	0	0	0	0	0	0	0	0	0	0	0	0	0	0	0	0	0	0	0	0	0	0	0	0	0	0	0
Eukaryota						dropped	Zotu1001	2	0	0	0	0	0	0	0	0	0	0	0	0	0	0	0	0	0	0	0	0	0	0	0	0	0	0	0	0	0	0	0	0	0	0	0	0	0	0	0	0	0
Eukaryota						dropped	Zotu1053	4	0	0	0	0	0	0	0	0	0	0	0	0	0	0	0	0	0	0	0	0	0	0	0	0	0	0	0	0	0	0	0	0	0	0	0	0	0	0	0	0	0
Eukaryota						dropped	Zotu1087	2	0	0	0	0	0	0	0	0	0	0	0	0	0	0	0	0	0	0	0	0	0	0	0	0	0	0	0	0	0	0	0	0	0	0	0	0	0	0	0	0	0
Eukaryota						dropped	Zotu1141	2	0	0	0	0	0	0	0	0	0	0	0	0	0	0	0	0	0	0	0	0	0	0	0	0	0	0	0	0	0	0	0	0	0	0	0	0	0	0	0	0	0
Eukaryota						dropped	Zotu1215	2	1	0	0	0	0	0	0	0	0	0	0	0	0	0	0	0	0	0	0	0	0	0	0	0	0	0	0	0	0	0	0	0	0	1	81	4	0	0	0	0	0
Eukaryota						dropped	Zotu1262	2	0	0	0	0	0	0	0	0	0	0	0	0	0	0	0	0	0	0	0	0	0	0	0	0	0	0	0	0	0	0	0	0	0	0	0	0	0	0	0	0	0
Eukaryota						dropped	Zotu1276	2	0	0	0	0	0	0	0	0	0	0	0	0	0	0	0	0	0	0	0	0	0	0	0	0	0	0	0	0	0	0	0	0	0	0	0	0	0	0	0	0	0
Eukaryota						dropped	Zotu1300	2	0	0	0	0	0	0	0	0	0	0	0	0	0	0	0	0	0	0	0	0	0	0	0	0	0	0	0	0	0	0	0	0	0	0	0	0	0	0	0	0	0
Eukaryota						dropped	Zotu1379	2	0	0	0	0	0	0	0	0	0	0	0	0	0	0	0	0	0	0	0	0	0	0	0	0	0	0	0	0	0	0	0	0	0	0	0	0	0	0	0	0	0
Eukaryota						dropped	Zotu1473	2	0	0	0	0	0	0	0	0	0	0	0	0	0	0	0	0	0	0	0	0	0	0	0	0	0	0	0	0	0	0	0	0	0	0	0	0	0	0	0	0	0
Eukaryota						dropped	Zotu1539	2	0	0	0	0	0	0	0	0	0	0	0	0	0	0	0	0	0	0	0	0	0	0	0	0	0	0	0	0	0	0	0	0	0	0	0	0	0	0	0	0	0
Eukaryota						dropped	Zotu1581	3	0	0	0	0	0	0	0	0	0	0	0	0	0	0	0	0	0	0	0	0	0	0	0	0	0	0	0	0	0	0	0	0	0	0	0	0	0	0	0	0	0
Eukaryota						dropped	Zotu1630	2	0	0	0	0	0	0	0	0	0	0	0	0	0	0	0	0	0	0	0	0	0	0	0	0	0	0	0	0	0	0	0	0	0	0	0	0	0	0	0	0	0
Eukaryota						dropped	Zotu1675	2	0	0	0	0	0	0	0	0	0	0	0	0	0	0	0	0	0	0	0	0	0	0	0	0	0	0	0	0	0	0	0	0	0	0	0	0	0	0	0	0	0
Eukaryota						dropped	Zotu1689	2	0	0	0	0	0	0	0	0	0	0	0	0	0	0	0	0	0	0	0	0	0	0	0	0	0	0	0	0	0	0	0	0	0	0	0	0	0	0	0	0	0
Eukaryota						dropped	Zotu1698	3	0	0	0	0	0	0	0	0	0	0	0	0	0	0	0	0	0	0	0	0	0	0	0	0	0	0	0	0	0	0	0	0	0	0	0	0	0	0	0	0	0
Eukaryota						dropped	Zotu1826	2	0	0	0	0	0	0	0	0	0	0	0	0	0	0	0	0	0	0	0	0	0	0	0	0	0	0	0	0	0	0	0	0	0	0	0	0	0	0	0	0	0
Eukaryota						dropped	Zotu2204	2	0	0	0	0	0	0	0	0	0	0	0	0	0	0	0	0	0	0	0	0	0	0	0	0	0	0	0	0	0	0	0	0	0	0	0	0	0	0	0	0	0
Eukaryota						dropped	Zotu2283	2	0	0	0	0	0	0	0	0	0	0	0	0	0	0	0	0	0	0	0	0	0	0	0	0	0	0	0	0	0	0	0	0	0	0	0	0	0	0	0	0	0
Eukaryota						dropped	Zotu2309	2	0	0	0	0	0	0	0	0	0	0	0	0	0	0	0	0	0	0	0	0	0	0	0	0	0	0	0	0	0	0	0	0	0	0	0	0	0	0	0	0	0
Eukaryota						dropped	Zotu2393	2	0	0	0	0	0	0	0	0	0	0	0	0	0	0	0	0	0	0	0	0	0	0	0	0	0	0	0	0	0	0	0	0	0	0	0	0	0	0	0	0	0
Eukaryota						dropped	Zotu2504	3	0	0	0	0	0	0	0	0	0	0	0	0	0	0	0	0	0	0	0	0	0	0	0	0	0	0	0	0	0	0	0	0	0	0	0	0	0	0	0	0	0
Eukaryota						eukaryotic picoplankton environmental sample	Zotu354	1	0	0	0	0	0	0	0	0	0	0	0	0	0	0	0	0	0	0	0	0	0	0	0	0	0	0	0	0	0	0	0	0	0	0	0	0	0	0	0	0	0
Eukaryota						uncultured eukaryote	Zotu9	1	0	0	0	0	0	0	0	0	0	0	0	0	0	0	0	0	0	0	0	0	0	0	0	0	0	0	0	0	0	0	0	0	0	0	0	0	0	0	0	0	0
Eukaryota						uncultured eukaryote	Zotu14	1	0	0	0	0	0	0	0	0	0	0	0	0	0	0	0	0	0	0	0	0	0	0	0	0	0	0	0	0	0	0	0	0	0	0	0	0	0	0	0	0	0
Eukaryota						uncultured eukaryote	Zotu16	1	0	0	0	0	0	0	0	0	0	0	0	0	0	0	0	0	0	0	0	0	0	0	0	0	0	0	0	0	0	0	0	0	0	0	0	0	0	0	0	0	0
Eukaryota						uncultured eukaryote	Zotu25	1	0	0	0	0	0	0	0	0	0	0	0	0	0	0	0	0	0	0	0	0	0	0	0	0	0	0	0	0	0	0	0	0	0	0	0	0	0	0	0	0	0
Eukaryota						uncultured eukaryote	Zotu31	1	0	1	0	0	0	0	0	0	0	0	0	0	0	0	0	0	0	0	0	0	0	0	0	0	0	0	0	0	0	0	0	0	0	0	0	0	0	0	0	0	0
Eukaryota						uncultured eukaryote	Zotu36	1	0	0	13635	0	0	0	0	0	0	0	0	0	0	0	0	0	0	0	0	0	0	0	0	0	0	0	0	0	0	0	0	0	0	0	0	0	0	0	0	0	0
Eukaryota						uncultured eukaryote	Zotu42	1	0	0	0	0	0	0	0	0	0	0	0	0	0	0	0	0	0	0	0	0	0	0	0	0	0	0	0	0	0	0	0	0	0	0	0	0	0	0	0	0	0
Eukaryota						uncultured eukaryote	Zotu52	1	0	0	0	0	0	0	0	0	0	0	0	0	0	0	0	0	0	0	0	0	0	0	0	0	0	0	0	0	0	0	0	0	0	0	0	0	0	0	0	0	0
Eukaryota						uncultured eukaryote	Zotu99	1	0	0	0	0	0	0	0	0	0	0	0	0	0	0	0	0	0	0	0	0	0	0	0	0	0	0	0	0	0	0	0	0	0	0	0	0	0	0	0	0	0
Eukaryota						uncultured eukaryote	Zotu153	1	0	0	0	0	0	0	0	0	0	0	0	0	0	0	0	0	0	0	0	0	0	0	0	0	0	0	0	0	0	0	0	0	0	0	0	0	0	0	0	0	0
Eukaryota						uncultured eukaryote	Zotu163	1	0	0	0	0	0	0	0	0	0	0	1	0	2	0	0	0	1	0	0	0	0	0	0	0	0	0	0	0	0	0	0	0	0	0	0	0	0	0	0	0	0
Eukaryota						uncultured eukaryote	Zotu164	1	0	0	0	2110	0	0	0	0	0	0	0	0	0	0	0	0	0	0	0	0	0	0	0	0	0	0	0	0	0	0	0	0	0	2	41	1	0	0	0	0	0
Eukaryota						uncultured eukaryote	Zotu220	1	0	0	0	0	0	0	0	0	0	0	0	0	0	0	0	0	0	0	0	0	0	0	0	0	0	0	0	0	0	0	0	0	0	0	0	0	0	0	0	0	0
Eukaryota						uncultured eukaryote	Zotu329	1	0	0	0	0	0	0	0	0	0	0	0	0	0	0	0	0	0	0	0	0	0	0	0	0	0	0	0	0	0	0	0	0	0	0	0	0	0	0	0	0	0
Eukaryota						uncultured eukaryote	Zotu355	1	0	0	0	0	0	0	0	0	0	0	0	0	0	0	0	0	0	0	0	0	0	0	0	0	0	0	0	0	0	0	0	0	0	0	0	0	0	0	0	0	0
Eukaryota						uncultured eukaryote	Zotu370	1	0	0	0	0	0	0	0	0	0	0	0	0	0	0	0	0	0	0	0	0	0	0	0	0	0	0	0	0	0	0	0	0	0	0	0	0	0	0	0	0	0
Eukaryota						uncultured eukaryote	Zotu381	1	0	0	0	0	0	0	0	0	0	0	0	0	0	0	0	0	0	0	0	0	0	0	0	0	0	0	0	0	0	0	0	0	0	0	0	0	0	0	0	0	0
Eukaryota						uncultured eukaryote	Zotu387	1	0	0	0	0	0	0	0	0	0	0	0	0	0	0	0	0	0	0	0	0	0	0	0	0	0	0	0	0	0	0	0	0	0	0	0	0	0	0	0	0	0
Eukaryota						uncultured eukaryote	Zotu395	1	0	0	0	0	0	0	0	0	0	0	0	0	0	0	0	0	0	0	0	0	0	0	0	0	0	0	0	0	0	0	0	0	0	0	0	0	0	0	0	0	0
Eukaryota						uncultured eukaryote	Zotu407	1	0	0	0	0	0	0	0	0	0	0	0	0	0	0	0	0	0	0	0	0	0	0	0	0	0	0	0	0	0	0	0	0	0	0	0	0	0	0	0	0	0
Eukaryota						uncultured eukaryote	Zotu421	1	0	0	0	0	0	0	0	0	0	0	0	0	0	0	0	0	0	0	0	0	0	0	0	0	0	0	0	0	0	0	0	0	0	0	0	0	0	0	0	0	0
Eukaryota						uncultured eukaryote	Zotu440	1	0	0	0	0	0	0	0	0	0	0	0	0	0	0	0	0	0	0	0	0	0	0	0	0	0	0	0	0	0	0	0	0	0	0	0	0	0	0	0	0	0
Eukaryota						uncultured eukaryote	Zotu473	1	0	0	0	0	0	0	0	0	0	0	0	0	0	0	0	0	0	0	0	0	0	0	0	0	0	0	0	0	0	0	0	0	0	0	0	0	0	0	0	0	0
Eukaryota						uncultured eukaryote	Zotu532	1	0	0	0	0	0	0	0	0	0	0	0	0	0	0	0	0	0	0	0	0	0	0	0	0	0	0	0	0	0	0	0	0	0	0	0	0	0	0	0	0	0
Eukaryota						uncultured eukaryote	Zotu625	1	0	0	0	0	0	0	0	0	0	0	0	0	0	0	0	0	0	0	0	0	0	0	0	0	0	0	0	0	0	0	0	0	0	0	0	0	0	0	0	0	0
Eukaryota						uncultured eukaryote	Zotu713	1	0	0	0	0	0	0	0	0	0	0	0	0	0	0	0	0	0	0	0	0	0	0	0	0	0	0	0	0	0	0	0	0	0	0	0	0	0	0	0	0	0
Eukaryota						uncultured eukaryote	Zotu766	1	0	0	0	0	0	0	0	0	0	0	0	0	0	0	0	0	0	0	0	0	0	0	0	0	0	0	0	0	0	0	0	0	0	0	0	0	0	0	0	0	0
Eukaryota						uncultured eukaryote	Zotu776	1	0	0	0	0	0	0	0	0	0	0	0	0	0	0	0	0	0	0	0	0	0	0	0	0	0	0	0	0	0	0	0	0	0	0	0	0	0	0	0	0	0
Eukaryota						uncultured eukaryote	Zotu971	1	0	0	0	0	0	0	0	0	0	0	0	0	0	0	0	0	0	0	0	0	0	0	0	0	0	0	0	0	0	0	0	0	0	0	0	0	0	0	0	0	0
Eukaryota						uncultured eukaryote	Zotu985	1	0	0	1	0	0	0	0	0	0	0	0	0	0	0	0	0	0	0	0	0	0	0	0	0	0	0	0	0	0	0	0	0	0	0	0	0	0	0	0	0	0
Eukaryota						uncultured eukaryote	Zotu1070	1	0	0	0	0	0	0	0	0	0	0	0	0	0	0	0	0	0	0	0	0	0	0	0	0	0	0	0	0	0	0	0	0	0	0	0	0	0	0	0	0	0
Eukaryota						uncultured eukaryote	Zotu1122	1	0	0	0	0	0	0	0	0	0	0	0	0	0	0	0	0	0	0	0	0	0	0	0	0	0	0	0	0	0	0	0	0	0	0	0	0	0	0	0	0	0
Eukaryota						uncultured eukaryote	Zotu1126	1	0	0	0	0	0	0	0	0	0	0	0	0	0	0	0	0	0	0	0	0	0	0	0	0	0	0	0	0	0	0	0	0	0	0	0	0	0	0	0	0	0
Eukaryota						uncultured eukaryote	Zotu1183	1	0	0	0	0	0	0	0	0	0	0	0	0	0	0	0	0	0	0	0	0	0	0	0	0	0	0	0	0	0	0	0	0	0	0	0	0	0	0	0	0	0
Eukaryota						uncultured eukaryote	Zotu1435	1	0	0	0	0	0	0	0	0	0	0	0	0	0	0	0	0	0	0	0	0	0	0	0	0	0	0	0	0	0	0	0	0	0	0	0	0	0	0	0	0	0
Eukaryota						uncultured eukaryote	Zotu1462	1	0	0	0	0	0	0	0	0	0	0	0	0	0	0	0	0	0	0	0	0	0	0	0	0	0	0	0	0	0	0	0	0	0	0	0	0	0	0	0	0	0
Eukaryota						uncultured eukaryote	Zotu1530	1	0	0	0	0	0	0	0	0	0	0	0	0	0	0	0	0	0	0	0	0	0	0	0	0	0	0	0	0	0	0	0	0	0	0	0	0	0	0	0	0	0
Eukaryota						uncultured eukaryote	Zotu1591	1	0	0	0	0	0	0	0	0	0	0	0	0	0	0	0	0	0	0	0	0	0	0	0	0	0	0	0	0	0	0	0	0	0	0	0	0	0	0	0	0	0
Eukaryota						uncultured eukaryote	Zotu1600	1	0	0	0	0	0	0	0	0	0	0	0	0	0	0	0	0	0	0	0	0	0	0	0	0	0	0	0	0	0	0	0	0	0	0	0	0	0	0	0	0	0
Eukaryota						uncultured eukaryote	Zotu1607	1	0	0	0	0	0	0	0	0	0	0	0	0	0	0	0	0	0	0	0	0	0	0	0	0	0	0	0	0	0	0	0	0	0	0	0	0	0	0	0	0	0
Eukaryota						uncultured eukaryote	Zotu1716	1	0	0	0	0	0	0	0	0	0	0	0	0	0	0	0	0	0	0	0	0	0	0	0	0	0	0	0	0	0	0	0	0	0	0	0	0	0	0	0	0	0
Eukaryota						uncultured eukaryote	Zotu1727	1	0	0	0	0	0	0	0	0	0	0	0	0	0	0	0	0	0	0	0	0	0	0	0	0	0	0	0	0	0	0	0	0	0	0	0	0	0	0	0	0	0
Eukaryota						uncultured eukaryote	Zotu1736	1	0	0	0	0	0	0	0	0	0	0	0	0	0	0	0	0	0	0	0	0	0	0	0	0	0	0	0	0	0	0	0	0	0	0	0	0	0	0	0	0	0
Eukaryota						uncultured eukaryote	Zotu1777	1	0	0	0	0	0	0	0	0	0	0	0	0	0	0	0	0	0	0	0	0	0	0	0	0	0	0	0	0	0	0	0	0	0	0	0	0	0	0	0	0	0
Eukaryota						uncultured eukaryote	Zotu1838	1	0	0	0	0	0	0	0	0	0	0	0	0	0	0	0	0	0	0	0	0	0	0	0	0	0	0	0	0	0	0	0	0	0	0	0	0	0	0	0	0	0
Eukaryota						uncultured eukaryote	Zotu2020	1	0	0	0	0	0	0	0	0	0	0	0	0	0	0	0	0	0	0	0	0	0	0	0	0	0	0	0	0	0	0	0	0	0	0	0	0	0	0	0	0	0
Eukaryota						uncultured eukaryote	Zotu2123	1	0	0	0	0	0	0	0	0	0	0	0	0	0	0	0	0	0	0	0	0	0	0	0	0	0	0	0	0	0	0	0	0	0	0	0	0	0	0	0	0	0
Eukaryota						uncultured eukaryote	Zotu2262	1	0	0	0	0	0	0	0	0	0	0	0	0	0	0	0	0	0	0	0	0	0	0	0	0	0	0	0	0	0	0	0	0	0	0	0	0	0	0	0	0	0
Eukaryota						uncultured eukaryote	Zotu2328	1	0	0	0	0	0	0	0	0	0	0	0	0	0	0	0	0	0	0	0	0	0	0	0	0	0	0	0	0	0	0	0	0	0	0	0	0	0	0	0	0	0
Eukaryota						uncultured eukaryote	Zotu2339	1	0	0	0	0	0	0	0	0	0	0	0	0	0	0	0	0	0	0	0	0	0	0	0	0	0	0	0	0	0	0	0	0	0	0	0	0	0	0	0	0	0
Eukaryota						uncultured eukaryote	Zotu2421	1	0	0	0	0	0	0	0	0	0	0	0	0	0	0	0	0	0	0	0	0	0	0	0	0	0	0	0	0	0	0	0	0	0	0	0	0	0	0	0	0	0
Eukaryota						uncultured eukaryote	Zotu2459	1	0	0	0	0	0	0	0	0	0	0	0	0	0	0	0	0	0	0	0	0	0	0	0	0	0	0	0	0	0	0	0	0	0	0	0	0	0	0	0	0	0
Eukaryota						uncultured eukaryote	Zotu2463	1	0	0	0	0	0	0	0	0	0	0	0	0	0	0	0	0	0	0	0	0	0	0	0	0	0	0	0	0	0	0	0	0	0	0	0	0	0	0	0	0	0
Eukaryota						uncultured eukaryote	Zotu2549	1	0	0	0	0	0	0	0	0	0	0	0	0	0	0	0	0	0	0	0	0	0	0	0	0	0	0	0	0	0	0	0	0	0	0	0	0	0	0	0	0	0
Eukaryota						uncultured eukaryote	Zotu2666	1	0	0	0	0	0	0	0	0	0	0	0	0	0	0	0	0	0	0	0	0	0	0	0	0	0	0	0	0	0	0	0	0	0	0	0	0	0	0	0	0	0
Eukaryota						uncultured marine eukaryote	Zotu297	1	0	0	0	0	0	0	0	0	0	0	0	0	0	0	0	0	0	0	0	0	0	0	0	0	0	0	0	0	0	0	0	0	0	0	0	0	0	0	0	0	0
Eukaryota						uncultured marine eukaryote	Zotu2095	1	0	0	0	0	0	0	0	0	0	0	0	0	0	0	0	0	0	0	0	0	0	0	0	0	0	0	0	0	0	0	0	0	0	0	0	0	0	0	0	0	0
Eukaryota						uncultured metazoan	Zotu68	1	0	0	0	0	0	0	0	0	0	0	0	0	0	0	0	0	0	0	0	0	0	0	0	0	0	0	0	0	0	0	0	0	0	0	0	0	0	0	0	0	0
Eukaryota						uncultured stramenopile	Zotu642	1	0	0	0	0	0	0	0	0	0	0	0	0	0	0	0	0	0	0	0	0	0	0	0	0	0	0	0	0	0	0	0	0	0	0	0	0	0	0	0	0	0
[truncated: 37 more columns]

## Sheet: 18Suni_ZOTUS_CLEAN
S1 Appendix. 18Suni assay and ITS2 assay ZOTU assignment based on DNA isolated from seawater and oval butterflyfish (Chaetodon lunulatus) gut samples collected at 10 sites from Dongsha Atoll (Taiwan) in the South China Sea. The numbers in cells are the number of unique reads per ZOTU. BLANK4 refers to one of the extraction blanks that produced reads, indicated by the highlighted rows in yellow, w…
domain	phylum	class	order	family	genus	species	ZOTU	Clu1a	Clu2a	Clu3a	Clu4a	Clu5a	Clu6a	Clu7a	Clu8a	Clu9a	Clu10a	Clu11a	Clu12a	Clu13a	Clu14a	Clu15a	Clu16a	Clu17a	Clu18a	Clu19a	Clu20a	Clu21a	Clu23a	Clu24a	Clu25a	Clu26a	Clu27a	Clu28b	Clu29b	Clu30b	Clu32b	Clu33b	Clu34b	Clu35b	Clu36b	Clu37b	Clu38b	Clu39b	Clu40b	DGX1	DGX2	DGX3	DGX4
Eukaryota	Annelida	Polychaeta	Phyllodocida	Polynoidae	dropped	dropped	Zotu1866	0	0	0	0	0	0	0	0	0	0	0	0	0	0	0	0	0	0	0	0	0	0	0	0	0	0	0	0	0	0	0	0	0	0	0	0	0	0	0	0	0	0
Eukaryota	Annelida	Polychaeta	Spionida	Spionidae	Aurospio	Aurospio dibranchiata	Zotu388	0	0	0	0	0	0	0	0	0	0	0	0	0	0	0	0	0	0	0	0	0	0	0	0	0	0	0	0	0	0	0	0	0	0	0	0	0	0	0	0	0	0
Eukaryota	Annelida	Polychaeta	Terebellida	Terebellidae	Loimia	dropped	Zotu1950	0	0	0	0	0	0	0	0	0	0	0	0	0	0	0	0	0	0	0	0	0	0	0	0	0	0	0	0	0	0	0	0	0	0	0	0	0	0	0	0	0	0
Eukaryota	Annelida	Polychaeta		Capitellidae	Dasybranchus	dropped	Zotu2703	0	0	0	0	0	0	0	0	0	0	0	0	0	0	0	0	0	0	0	0	0	0	0	0	0	0	0	0	0	0	0	0	0	0	0	0	0	0	0	0	0	0
Eukaryota	Annelida	Polychaeta		Nerillidae	Leptonerilla	Leptonerilla sp. 'Scripps Aquarium'	Zotu2138	0	0	0	0	0	0	0	0	0	0	0	0	0	0	0	0	0	0	0	0	0	0	0	0	0	0	0	0	0	0	0	0	0	0	0	0	0	0	6	0	0	1
Eukaryota	Annelida	Polychaeta				Palpata sp. PO2	Zotu413	0	0	0	0	0	0	0	0	0	0	0	0	0	0	0	0	0	0	0	0	0	0	0	0	0	0	0	0	0	0	0	0	0	0	0	0	0	0	0	0	0	0
Eukaryota	Arthropoda	Hexanauplia	Calanoida	Pseudodiaptomidae	Pseudodiaptomus	Pseudodiaptomus nihonkaiensis	Zotu6	0	0	0	0	0	0	0	0	0	0	0	0	0	0	0	0	0	0	0	0	0	0	0	0	0	0	0	0	0	0	0	0	0	0	0	0	0	0	0	0	0	0
Eukaryota	Arthropoda	Hexanauplia	Cyclopoida	dropped	dropped	dropped	Zotu28	1	2	0	0	2	2	0	1	8	0	0	2	2	0	0	0	0	0	0	0	0	0	0	0	13	0	0	0	0	0	0	0	0	1	9	10	0	0	0	0	0	0
Eukaryota	Arthropoda	Hexanauplia	Cyclopoida	Xarifiidae	Xarifia	Xarifia sp. New Caledonia-RJH-2004	Zotu1662	0	0	0	0	5	0	0	0	6	2	0	0	1	0	0	1	0	0	0	0	0	3	0	0	0	0	0	0	0	0	0	0	0	0	51	3	0	0	0	0	0	0
Eukaryota	Arthropoda	Hexanauplia	Harpacticoida	Thalestridae	Parathalestris	Parathalestris verrucosa	Zotu646	0	0	0	0	0	0	1	0	0	0	0	0	0	0	0	0	0	0	0	0	0	0	0	0	0	0	0	0	0	0	0	0	0	0	0	0	0	0	0	0	0	0
Eukaryota	Arthropoda	Hexanauplia	Sessilia	dropped	dropped	dropped	Zotu702	0	0	0	0	0	0	0	0	0	0	0	0	0	0	0	0	0	0	0	0	0	0	0	0	0	0	0	0	0	0	0	0	0	0	0	0	0	0	0	0	0	0
Eukaryota	Arthropoda	Hexanauplia				dropped	Zotu1541	0	0	0	0	0	0	0	0	0	0	0	0	0	0	0	0	0	0	0	0	0	0	0	0	0	0	0	0	0	0	0	0	0	0	0	0	0	0	0	0	0	0
Eukaryota	Arthropoda	Malacostraca	Decapoda	dropped	dropped	dropped	Zotu1180	0	0	0	0	0	0	0	0	0	0	0	0	0	0	0	0	0	0	0	0	0	0	0	0	0	0	0	0	0	0	0	0	0	0	0	0	0	0	0	0	2	0
Eukaryota	Bacillariophyta	Bacillariophyceae	Thalassiophysales	Catenulaceae	Amphora	Amphora coffeiformis	Zotu2479	0	0	0	0	0	0	0	0	1	0	0	0	0	0	0	0	0	0	0	0	0	0	0	0	0	0	0	0	0	0	0	0	0	0	0	0	0	0	2	0	4	0
Eukaryota	Bacillariophyta	Coscinodiscophyceae	Rhizosoleniales	Rhizosoleniaceae	Dactyliosolen	Dactyliosolen blavyanus	Zotu505	0	0	0	0	0	0	0	0	0	0	0	0	0	0	0	0	0	0	0	0	0	0	0	0	0	0	0	0	0	0	0	0	0	0	0	0	0	0	0	0	0	0
Eukaryota	Bacillariophyta	Fragilariophyceae	Thalassionemales	Thalassionemataceae	Thalassionema	dropped	Zotu550	0	0	0	0	0	0	0	0	0	0	0	0	0	0	0	0	0	0	0	0	0	0	0	0	0	0	0	0	0	0	0	0	0	0	0	0	0	0	1	0	0	0
Eukaryota	Bacillariophyta					uncultured diatom	Zotu168	0	0	0	0	0	0	0	0	0	0	0	0	0	0	0	0	0	0	0	0	0	0	0	0	0	0	0	0	0	0	0	0	0	0	0	0	0	0	3	0	6	3
Eukaryota	Chlorophyta	dropped	dropped	dropped	dropped	dropped	Zotu1105	0	0	0	0	0	0	0	0	0	0	0	0	0	0	0	0	0	0	0	0	0	0	0	0	0	0	0	0	0	0	0	0	0	0	0	0	0	0	0	0	0	0
Eukaryota	Chlorophyta	Trebouxiophyceae	Chlorellales	Chlorellaceae	Nannochloris	Nannochloris sp. MBIC10749	Zotu774	0	0	0	0	0	0	0	0	0	0	0	0	0	0	0	0	0	0	0	0	0	0	0	0	0	0	0	0	0	0	0	0	0	0	0	0	0	0	0	0	0	0
Eukaryota	Chlorophyta	Ulvophyceae	Dasycladales	Polyphysaceae	Parvocaulis	Parvocaulis clavatus	Zotu1392	0	0	0	0	0	0	0	0	0	0	0	0	0	0	0	0	0	0	0	0	0	0	0	0	0	0	0	0	0	0	0	0	0	0	0	0	0	0	0	0	0	0
Eukaryota	Chlorophyta	Ulvophyceae	Dasycladales	Polyphysaceae	Parvocaulis	Parvocaulis parvulus	Zotu982	0	0	0	0	0	0	0	0	0	0	0	0	0	0	0	0	0	0	0	0	0	0	0	0	0	0	0	0	0	0	0	0	0	0	0	0	0	0	0	0	0	1
Eukaryota	Chlorophyta	Ulvophyceae	Dasycladales	Polyphysaceae	Parvocaulis	Parvocaulis parvulus	Zotu1009	0	0	0	0	0	0	0	0	0	0	0	0	0	0	0	0	0	0	0	0	0	0	0	0	0	0	0	0	0	0	0	0	0	0	0	0	0	0	0	0	1	1
Eukaryota	Chlorophyta	Ulvophyceae	Dasycladales	Polyphysaceae	Parvocaulis	Parvocaulis parvulus	Zotu1097	0	0	0	0	0	0	0	0	0	0	0	0	0	0	0	0	0	0	0	0	0	0	0	0	0	0	0	0	0	0	0	0	0	0	0	0	0	0	0	0	0	0
Eukaryota	Chlorophyta	Ulvophyceae	Dasycladales	Polyphysaceae	Parvocaulis	Parvocaulis parvulus	Zotu2126	0	0	0	0	0	0	0	0	0	0	0	0	0	0	0	0	0	0	0	0	0	0	0	0	0	0	0	0	0	0	0	0	0	0	0	0	0	0	0	0	0	0
Eukaryota	Chlorophyta	Ulvophyceae	Ulvales	dropped	dropped	dropped	Zotu2199	0	0	0	0	0	0	0	0	0	0	0	0	0	0	0	0	0	0	0	0	0	0	0	0	0	0	0	0	0	0	0	0	0	0	0	0	0	0	6	3	0	1
Eukaryota	Chordata	Actinopteri		Pomacentridae	Amphiprion	Amphiprion ocellaris	Zotu1585	0	0	0	0	0	0	0	0	0	0	0	0	0	0	0	0	0	0	0	0	0	0	0	0	0	0	0	0	0	0	0	0	0	0	0	0	0	0	2	0	2	0
Eukaryota	Chordata	Ascidiacea	Stolidobranchia	Styelidae	dropped	dropped	Zotu868	0	0	0	0	0	0	0	0	0	0	0	0	0	0	0	0	0	0	0	0	0	0	0	0	0	0	0	0	0	0	0	0	0	0	0	0	0	0	6	0	3	2
Eukaryota	Chordata	Ascidiacea	Stolidobranchia	Styelidae	dropped	dropped	Zotu1636	0	0	0	0	0	0	0	0	0	0	0	0	0	0	0	0	0	0	0	0	0	0	0	0	0	0	0	0	0	0	0	0	0	0	0	0	0	0	15	0	6	3
Eukaryota	Chordata	Ascidiacea	Stolidobranchia	Styelidae	dropped	dropped	Zotu2187	0	0	0	0	0	0	0	0	0	0	0	0	0	0	0	0	0	0	0	0	0	0	0	0	0	0	0	0	0	0	0	0	0	0	0	0	0	0	0	1	0	0
Eukaryota	Chordata	Ascidiacea	Stolidobranchia	Styelidae	Polycarpa	Polycarpa mytiligera	Zotu2249	0	0	0	0	0	0	0	0	0	0	0	0	0	0	0	0	0	0	0	0	0	0	0	0	0	0	0	0	0	0	0	0	0	0	0	0	0	0	0	0	4	0
Eukaryota	Ciliophora	dropped	dropped	dropped	dropped	dropped	Zotu1172	0	0	0	0	0	0	0	0	0	0	0	0	0	0	0	0	0	0	0	0	0	0	0	0	0	0	0	0	0	0	0	0	0	0	0	0	0	0	0	0	0	0
Eukaryota	Ciliophora	Litostomatea	Pleurostomatida	Litonotidae	Litonotus	Litonotus paracygnus	Zotu362	0	0	0	0	0	0	0	0	0	0	0	0	0	0	0	0	0	0	0	0	0	0	0	0	0	0	688	0	0	0	0	0	0	0	0	0	0	0	0	0	0	0
Eukaryota	Ciliophora	Litostomatea				Haptoria sp. bLaN1	Zotu111	0	0	0	0	0	0	0	0	0	0	0	0	0	0	0	0	0	0	0	0	0	0	0	0	0	0	0	0	0	0	0	0	0	0	0	0	0	0	0	0	0	0
Eukaryota	Cnidaria	Anthozoa	Scleractinia	Acroporidae	Acropora	Acropora aspera	Zotu2025	0	0	0	0	0	0	0	0	0	0	0	0	0	0	0	0	0	0	0	0	0	0	0	0	0	0	0	0	35	0	0	0	0	0	0	0	0	0	0	0	0	0
Eukaryota	Cnidaria	Anthozoa	Scleractinia	Acroporidae	Acropora	Acropora lutkeni	Zotu771	0	0	0	0	0	0	0	0	0	0	0	0	0	0	0	0	0	0	0	0	0	0	0	0	0	0	0	0	0	0	0	0	0	3	334	50	11	9	0	0	0	0
Eukaryota	Cnidaria	Anthozoa	Scleractinia	Acroporidae	Acropora	dropped	Zotu143	0	0	0	0	0	0	0	0	0	0	0	0	0	0	0	0	0	0	0	0	0	0	0	0	0	0	1173	214	0	0	0	0	886	123	0	17	0	7	0	0	0	0
Eukaryota	Cnidaria	Anthozoa	Scleractinia	Acroporidae	Acropora	dropped	Zotu449	11	0	0	0	0	0	0	0	0	0	0	0	0	0	0	0	0	0	0	0	0	0	0	0	0	0	2	231	5	0	0	0	335	0	0	0	0	0	0	0	0	0
Eukaryota	Cnidaria	Anthozoa	Scleractinia	Acroporidae	Acropora	dropped	Zotu553	0	0	0	0	0	1	0	0	0	0	0	0	0	0	0	0	0	0	0	0	0	0	0	0	0	0	214	54	0	0	0	0	139	22	0	1	0	0	0	0	0	0
Eukaryota	Cnidaria	Anthozoa	Scleractinia	Acroporidae	Acropora	dropped	Zotu554	0	0	0	0	0	346	0	0	0	0	0	0	0	0	0	0	0	0	0	0	0	0	0	0	0	0	0	159	0	8	0	0	201	41	0	0	0	0	0	0	0	0
Eukaryota	Cnidaria	Anthozoa	Scleractinia	Acroporidae	Acropora	dropped	Zotu592	5	0	0	0	0	0	0	0	0	0	0	0	0	0	0	0	0	0	0	0	0	0	0	0	0	0	0	168	36	0	0	1	335	3	0	0	0	0	0	0	0	0
Eukaryota	Cnidaria	Anthozoa	Scleractinia	Acroporidae	Acropora	dropped	Zotu1159	0	0	0	0	0	101	0	0	0	1	0	0	1	0	0	0	0	0	0	0	0	0	0	0	0	0	0	32	0	0	0	0	21	0	0	0	0	0	0	0	0	0
Eukaryota	Cnidaria	Anthozoa	Scleractinia	Acroporidae	Acropora	dropped	Zotu1481	2	0	0	0	0	2	0	0	0	0	0	0	0	0	0	0	0	0	0	0	0	0	0	0	0	0	1	4	0	0	0	0	75	0	0	0	0	0	0	0	0	0
Eukaryota	Cnidaria	Anthozoa	Scleractinia	Acroporidae	Acropora	dropped	Zotu1559	0	0	0	0	0	0	0	0	0	0	0	0	0	0	0	0	0	2	0	0	0	0	0	0	0	0	0	0	0	0	0	0	0	0	0	12	0	22	0	0	0	0
Eukaryota	Cnidaria	Anthozoa	Scleractinia	Acroporidae	Acropora	dropped	Zotu1774	1	0	0	0	0	0	0	0	2	0	0	0	0	0	0	0	0	0	0	0	0	0	0	0	0	0	0	25	0	0	0	0	15	0	0	0	0	0	0	0	0	0
Eukaryota	Cnidaria	Anthozoa	Scleractinia	Acroporidae	Acropora	dropped	Zotu2263	4	0	0	0	0	0	0	0	0	0	0	0	0	0	0	0	0	0	0	0	0	0	0	0	0	0	0	34	10	0	0	0	42	0	0	0	0	0	0	0	0	0
Eukaryota	Cnidaria	Anthozoa	Scleractinia	Agariciidae	dropped	dropped	Zotu13	265	9	79	0	3157	1169	2163	6140	6872	18521	45	1609	6	2427	674	0	2	3712	1649	5	0	109	1573	2654	0	252	5	2	1386	676	3833	77	1319	1429	1705	11636	12609	11129	0	0	0	0
Eukaryota	Cnidaria	Anthozoa	Scleractinia	dropped	dropped	dropped	Zotu1	229537	15840	18569	383	7995	7644	40460	10807	25193	117699	14238	22276	12914	24964	73256	26878	20713	28132	18556	19545	111380	39745	142981	120437	178207	172113	149167	42530	95831	120286	15879	114736	19527	143255	53378	30334	8569	4566	73	8	68	30
Eukaryota	Cnidaria	Anthozoa	Scleractinia	dropped	dropped	dropped	Zotu3	21538	7445	18739	113	12650	17182	61036	3139	25703	20440	2938	1174	8655	1582	1393	38	90	1968	28	465	530	1273	18034	11798	5515	462	1908	15140	5284	376	3	51	388	650	21265	718	62	656	0	0	0	1
Eukaryota	Cnidaria	Anthozoa	Scleractinia	Pocilloporidae	dropped	dropped	Zotu32	0	0	0	0	0	0	0	3	13	0	16	0	1	0	0	3	37	11	12	0	0	8	0	0	0	0	0	0	3	3	0	1	3	43	7384	3113	13179	1313	0	0	0	0
Eukaryota	Cnidaria	Hydrozoa	Anthoathecata	dropped	dropped	dropped	Zotu2680	0	0	0	0	0	0	0	0	0	0	0	0	0	0	0	0	0	0	0	0	0	0	0	0	1	0	0	0	0	0	0	0	0	0	0	0	0	0	1	0	0	0
Eukaryota	dropped	dropped	dropped	dropped	dropped	dropped	Zotu7	0	0	0	0	0	0	0	0	0	0	0	0	0	0	0	0	0	0	0	0	0	0	0	0	0	0	0	0	0	0	0	0	0	0	0	0	0	0	0	0	0	0
Eukaryota	dropped	dropped	dropped	dropped	dropped	dropped	Zotu15	0	0	0	0	0	0	0	0	0	0	0	0	0	0	0	0	0	0	0	0	0	0	0	0	0	0	0	0	0	0	0	0	0	0	0	0	0	0	3928	24	1232	863
Eukaryota	dropped	dropped	dropped	dropped	dropped	dropped	Zotu18	0	0	0	0	0	0	0	0	0	0	0	0	0	0	0	0	0	0	0	0	0	0	0	0	0	0	0	0	0	0	0	0	0	0	0	0	0	0	995	5	333	247
Eukaryota	dropped	dropped	dropped	dropped	dropped	dropped	Zotu21	0	0	0	0	0	0	0	0	0	0	0	0	0	0	0	0	0	0	0	0	0	0	0	0	0	0	0	0	0	0	0	0	0	0	0	0	0	0	0	0	0	0
Eukaryota	dropped	dropped	dropped	dropped	dropped	dropped	Zotu24	0	0	0	0	0	0	0	0	0	0	0	0	0	0	0	0	0	0	0	0	0	0	0	0	0	0	0	0	0	0	0	0	0	0	0	0	0	0	0	0	0	0
Eukaryota	dropped	dropped	dropped	dropped	dropped	dropped	Zotu43	0	0	0	0	0	0	0	0	0	0	0	0	0	0	0	0	0	0	0	0	0	0	0	0	0	0	0	0	0	0	0	0	0	0	0	0	0	0	433	0	160	139
Eukaryota	dropped	dropped	dropped	dropped	dropped	dropped	Zotu48	0	0	0	0	0	0	0	0	0	0	0	0	0	0	0	0	0	0	0	0	0	0	0	0	0	0	0	0	0	0	0	0	0	0	0	0	0	0	509	3	194	133
Eukaryota	dropped	dropped	dropped	dropped	dropped	dropped	Zotu55	0	0	0	0	0	0	0	0	0	0	0	0	0	0	0	0	0	0	0	0	0	0	0	0	0	0	0	0	0	0	0	0	0	0	0	0	0	0	58	0	8	9
Eukaryota	dropped	dropped	dropped	dropped	dropped	dropped	Zotu58	2	0	0	0	0	0	0	0	0	0	0	0	0	0	0	0	0	0	0	0	0	0	0	0	0	0	0	0	0	0	0	0	0	0	0	0	0	0	16	0	15	5
Eukaryota	dropped	dropped	dropped	dropped	dropped	dropped	Zotu66	0	0	0	0	0	0	0	0	0	0	0	0	0	0	0	0	0	0	0	0	0	0	0	0	0	0	0	0	0	0	0	0	0	0	0	0	0	0	97	7	2084	3473
Eukaryota	dropped	dropped	dropped	dropped	dropped	dropped	Zotu80	0	0	0	0	0	0	0	0	0	0	0	0	0	0	0	0	0	0	0	0	0	0	0	0	0	0	0	0	0	0	0	0	0	0	0	0	0	0	0	0	0	0
Eukaryota	dropped	dropped	dropped	dropped	dropped	dropped	Zotu91	0	0	0	0	0	0	0	0	0	0	0	0	0	0	0	0	0	0	0	0	0	0	0	0	0	0	0	0	0	0	0	0	0	0	0	0	0	0	1646	18	487	323
Eukaryota	dropped	dropped	dropped	dropped	dropped	dropped	Zotu100	0	0	0	0	0	0	0	0	0	0	0	0	0	0	0	0	0	0	0	0	0	0	0	0	0	0	0	0	0	0	0	0	0	0	0	0	0	0	0	0	0	0
Eukaryota	dropped	dropped	dropped	dropped	dropped	dropped	Zotu132	0	0	0	0	0	0	0	0	0	0	0	0	0	0	0	0	0	0	0	0	0	0	0	0	0	0	0	0	0	0	0	0	0	0	0	0	0	0	0	0	0	0
Eukaryota	dropped	dropped	dropped	dropped	dropped	dropped	Zotu156	0	0	0	0	0	0	0	0	0	0	0	0	0	0	0	0	0	0	0	0	0	0	0	0	0	0	0	0	0	0	0	0	0	0	0	0	0	0	8	0	14	3
Eukaryota	dropped	dropped	dropped	dropped	dropped	dropped	Zotu171	0	0	0	0	0	0	0	0	0	0	0	0	0	0	0	0	0	0	0	0	0	0	0	0	0	0	0	0	0	0	0	0	0	0	0	0	0	0	0	0	0	0
Eukaryota	dropped	dropped	dropped	dropped	dropped	dropped	Zotu218	0	0	0	0	0	0	0	0	0	0	0	0	0	0	0	0	0	0	0	0	0	0	0	0	0	0	0	0	0	0	0	0	0	0	0	0	0	0	8	0	1	0
Eukaryota	dropped	dropped	dropped	dropped	dropped	dropped	Zotu226	0	0	0	0	0	0	0	0	0	0	0	0	0	0	0	0	0	0	0	0	0	0	0	0	0	0	0	0	0	0	0	0	0	0	0	0	0	0	44	1	15	13
Eukaryota	dropped	dropped	dropped	dropped	dropped	dropped	Zotu227	0	0	0	0	0	0	0	0	0	0	0	0	0	0	0	0	0	0	0	0	0	0	0	0	0	0	0	0	0	0	0	0	0	0	0	0	0	0	215	0	74	32
Eukaryota	dropped	dropped	dropped	dropped	dropped	dropped	Zotu254	0	0	0	0	0	0	0	0	0	0	0	0	0	0	0	0	0	0	0	0	0	0	0	0	0	0	0	0	0	0	0	0	0	0	0	0	0	0	101	1	58	33
Eukaryota	dropped	dropped	dropped	dropped	dropped	dropped	Zotu273	0	0	0	0	0	0	0	0	0	0	0	0	0	0	0	0	0	0	0	0	0	0	0	0	0	0	0	0	0	0	0	0	0	0	0	0	0	0	78	0	38	27
Eukaryota	dropped	dropped	dropped	dropped	dropped	dropped	Zotu274	0	0	0	0	0	0	0	0	0	0	0	0	0	0	0	0	0	0	0	0	0	0	0	0	0	0	0	0	0	0	0	0	0	0	0	0	0	0	264	4	123	71
Eukaryota	dropped	dropped	dropped	dropped	dropped	dropped	Zotu280	0	0	0	0	0	0	0	0	0	0	0	0	0	0	0	0	0	0	0	0	0	0	0	0	0	0	0	0	0	0	0	0	0	0	0	0	0	0	1	0	0	3
Eukaryota	dropped	dropped	dropped	dropped	dropped	dropped	Zotu310	0	0	0	0	0	0	0	0	0	0	0	0	0	0	0	0	0	0	0	0	0	0	0	0	0	0	0	0	0	0	0	0	0	0	0	0	0	0	1	0	0	2
Eukaryota	dropped	dropped	dropped	dropped	dropped	dropped	Zotu352	0	0	0	0	0	0	0	0	0	0	0	0	0	0	0	0	0	0	0	0	0	0	0	0	0	0	0	0	0	0	0	0	0	0	0	0	0	0	0	0	0	0
Eukaryota	dropped	dropped	dropped	dropped	dropped	dropped	Zotu356	0	0	0	0	0	0	0	0	0	0	0	0	0	0	0	0	0	0	0	0	0	0	0	0	0	0	0	0	0	0	0	0	0	0	0	0	0	0	5	0	0	0
Eukaryota	dropped	dropped	dropped	dropped	dropped	dropped	Zotu363	0	0	0	0	0	0	0	0	0	0	0	0	0	0	0	0	0	0	0	0	0	0	0	0	0	0	0	0	0	0	0	0	0	0	0	0	0	0	0	0	0	0
Eukaryota	dropped	dropped	dropped	dropped	dropped	dropped	Zotu365	0	0	0	0	0	0	0	0	0	0	0	0	0	0	0	0	0	0	0	0	0	0	0	0	0	0	0	0	0	0	0	0	0	0	0	0	0	0	6	0	6	1
Eukaryota	dropped	dropped	dropped	dropped	dropped	dropped	Zotu368	0	0	0	0	0	0	0	0	0	0	0	0	0	0	0	0	0	0	0	0	0	0	0	0	0	0	0	0	0	0	0	0	0	0	0	0	0	0	0	0	0	0
Eukaryota	dropped	dropped	dropped	dropped	dropped	dropped	Zotu396	0	0	0	0	0	0	0	0	0	0	0	0	0	0	0	0	0	0	0	0	0	0	0	0	0	0	0	0	0	0	0	0	0	0	0	0	0	0	39	2	6	14
Eukaryota	dropped	dropped	dropped	dropped	dropped	dropped	Zotu397	0	0	0	0	0	0	0	0	0	0	0	0	0	0	0	0	0	0	0	0	0	0	0	0	0	0	0	0	0	0	0	0	0	0	0	0	0	0	4	1	2	1
Eukaryota	dropped	dropped	dropped	dropped	dropped	dropped	Zotu432	0	0	0	0	0	0	0	0	0	0	0	0	0	0	0	0	0	0	0	0	0	0	0	0	0	0	0	0	0	0	0	0	0	0	0	0	0	0	3	0	0	3
Eukaryota	dropped	dropped	dropped	dropped	dropped	dropped	Zotu448	0	0	0	0	0	0	0	0	0	0	0	0	0	0	0	0	0	0	0	0	0	0	0	0	0	0	0	0	0	0	0	0	0	0	0	0	0	0	14	2	5	3
Eukaryota	dropped	dropped	dropped	dropped	dropped	dropped	Zotu455	0	0	0	0	0	0	0	0	0	0	0	0	0	0	0	0	0	0	0	0	0	0	0	0	0	0	0	0	0	0	0	0	0	0	0	0	0	0	112	4	70	51
Eukaryota	dropped	dropped	dropped	dropped	dropped	dropped	Zotu540	0	0	0	0	0	0	0	0	0	0	0	0	0	0	0	0	0	0	0	0	0	0	0	0	0	0	0	0	0	0	0	0	0	0	0	0	0	0	0	0	0	0
Eukaryota	dropped	dropped	dropped	dropped	dropped	dropped	Zotu549	0	0	0	0	0	0	0	0	0	0	0	0	0	0	0	0	0	0	0	0	0	0	0	0	0	0	0	0	0	0	0	0	0	0	0	0	0	0	8	0	0	9
Eukaryota	dropped	dropped	dropped	dropped	dropped	dropped	Zotu573	0	0	0	0	0	0	0	0	0	0	0	0	0	0	0	0	0	0	0	0	0	0	0	0	0	0	0	0	0	0	0	0	0	0	0	0	0	0	0	0	0	0
Eukaryota	dropped	dropped	dropped	dropped	dropped	dropped	Zotu689	0	0	0	0	0	0	0	0	0	0	0	0	0	0	0	0	1	0	0	0	0	0	0	0	1215	0	0	0	0	0	1	0	0	0	2	0	0	0	0	0	0	0
Eukaryota	dropped	dropped	dropped	dropped	dropped	dropped	Zotu743	0	0	0	0	0	0	0	0	0	0	0	0	0	0	0	0	0	0	0	0	0	0	0	0	0	0	0	0	0	0	0	0	0	0	0	0	0	0	0	0	0	0
Eukaryota	dropped	dropped	dropped	dropped	dropped	dropped	Zotu770	0	0	0	0	0	0	0	0	0	0	0	0	0	0	0	0	0	0	0	0	0	0	0	0	0	0	0	0	0	0	0	0	0	0	0	0	0	0	0	0	0	0
Eukaryota	dropped	dropped	dropped	dropped	dropped	dropped	Zotu885	0	0	0	0	0	0	0	0	0	0	0	0	0	0	0	0	0	0	0	0	0	0	0	0	0	0	0	0	0	0	0	0	0	0	0	0	0	0	0	0	0	0
Eukaryota	dropped	dropped	dropped	dropped	dropped	dropped	Zotu917	0	0	0	0	0	0	0	0	0	0	0	0	0	0	0	0	0	0	0	0	0	0	0	0	0	0	0	0	0	0	0	0	0	0	0	0	0	0	3	0	1	0
Eukaryota	dropped	dropped	dropped	dropped	dropped	dropped	Zotu921	0	0	0	0	0	0	0	0	0	0	0	0	0	0	0	0	0	0	0	0	0	0	0	0	0	0	0	0	0	0	0	0	0	0	0	0	0	0	9	0	2	0
Eukaryota	dropped	dropped	dropped	dropped	dropped	dropped	Zotu1169	0	0	0	0	0	0	0	0	0	0	0	0	0	0	0	0	0	0	0	0	0	0	0	0	0	0	0	0	0	0	0	0	0	0	0	0	0	0	7	0	2	0
Eukaryota	dropped	dropped	dropped	dropped	dropped	dropped	Zotu1218	0	0	0	0	0	0	0	0	0	0	0	0	0	0	0	0	0	0	0	0	0	0	0	0	0	0	0	0	0	0	0	0	0	0	0	0	0	0	0	0	0	0
Eukaryota	dropped	dropped	dropped	dropped	dropped	dropped	Zotu1281	0	0	0	0	0	0	0	0	0	0	0	0	0	0	0	0	0	0	0	0	0	0	0	0	0	0	0	0	0	0	0	0	0	0	0	0	0	0	0	1	0	0
Eukaryota	dropped	dropped	dropped	dropped	dropped	dropped	Zotu1305	0	0	0	0	0	0	0	0	0	0	0	0	0	0	0	0	0	0	0	0	0	0	0	0	0	0	0	0	0	0	0	0	0	0	0	0	0	0	7	0	6	2
Eukaryota	dropped	dropped	dropped	dropped	dropped	dropped	Zotu1315	0	0	0	0	0	0	0	0	0	0	0	0	0	0	0	0	0	0	0	0	0	0	0	0	0	0	0	0	0	0	0	0	0	0	0	0	0	0	0	0	0	0
Eukaryota	dropped	dropped	dropped	dropped	dropped	dropped	Zotu1362	0	0	0	0	0	0	0	0	0	0	0	0	0	0	0	0	0	0	0	0	0	0	0	0	0	0	0	0	0	0	0	0	0	0	0	0	0	0	0	0	0	0
Eukaryota	dropped	dropped	dropped	dropped	dropped	dropped	Zotu1738	0	0	0	0	0	0	0	0	0	0	0	0	0	0	0	0	0	0	0	0	0	0	0	0	0	0	0	0	0	0	0	0	0	0	0	0	0	0	0	0	0	0
Eukaryota	dropped	dropped	dropped	dropped	dropped	dropped	Zotu1781	0	0	0	0	0	0	0	0	0	0	0	0	0	0	0	0	0	0	0	0	0	0	0	0	0	0	0	0	0	0	0	0	0	0	0	0	0	0	0	0	0	0
Eukaryota	dropped	dropped	dropped	dropped	dropped	dropped	Zotu1830	0	0	0	0	0	0	0	0	0	0	0	0	0	0	0	0	0	0	0	0	0	0	0	0	0	0	0	0	0	0	0	0	0	0	0	0	0	0	11	0	9	12
Eukaryota	dropped	dropped	dropped	dropped	dropped	dropped	Zotu1875	0	0	0	0	0	0	0	0	0	0	0	0	0	0	0	0	0	0	0	0	0	0	0	0	0	0	0	0	0	0	0	0	0	0	0	0	0	0	0	0	0	0
Eukaryota	dropped	dropped	dropped	dropped	dropped	dropped	Zotu1899	0	0	0	0	0	0	0	0	0	0	0	0	0	0	0	0	0	0	0	0	0	0	0	0	0	0	0	0	0	0	0	0	0	0	0	0	0	0	0	0	0	0
Eukaryota	dropped	dropped	dropped	dropped	dropped	dropped	Zotu2130	0	0	0	0	0	0	0	0	0	0	0	0	0	0	13	0	0	0	0	0	0	0	0	0	0	0	0	0	0	0	0	0	0	0	0	0	0	0	0	0	0	0
Eukaryota	dropped	dropped	dropped	dropped	dropped	dropped	Zotu2652	0	0	0	0	0	0	0	0	0	0	0	0	0	0	0	0	0	0	0	0	0	0	0	0	0	0	0	0	0	0	0	0	0	0	0	0	0	0	0	0	0	0
Eukaryota	Mollusca	Bivalvia	Cardiida	dropped	dropped	dropped	Zotu1547	0	0	0	0	0	0	0	0	0	0	0	0	0	0	0	0	0	0	0	0	0	0	0	0	0	0	0	0	0	0	0	0	0	0	0	0	0	0	0	0	0	0
Eukaryota	Mollusca	Bivalvia	Limoida	Limidae	Limaria	Limaria hians	Zotu2366	0	0	0	0	0	0	0	0	0	0	0	0	0	0	0	0	0	0	0	0	0	0	0	0	0	0	0	0	0	0	0	0	0	0	0	0	0	0	0	0	0	0
Eukaryota	Mollusca	Bivalvia	Myida	Teredinidae	dropped	dropped	Zotu291	0	0	0	0	0	0	0	0	0	0	0	0	0	0	0	0	0	0	0	0	0	0	0	0	0	0	0	0	0	0	0	0	0	0	0	0	0	0	0	0	0	0
Eukaryota	Mollusca	Bivalvia	Myida	Teredinidae	dropped	dropped	Zotu650	0	0	0	0	0	0	0	0	0	0	0	0	0	0	0	0	0	0	0	0	0	0	0	0	0	0	0	0	0	0	0	0	0	0	0	0	0	0	0	7	2	0
Eukaryota	Mollusca	Bivalvia	Mytiloida	Mytilidae	dropped	dropped	Zotu2153	0	0	0	0	0	0	0	0	0	0	0	0	0	0	0	0	0	0	0	0	0	0	0	0	0	0	0	0	0	0	0	0	0	0	0	0	0	0	22	1	3	3
Eukaryota	Mollusca	Bivalvia	Pectinida	Pectinidae	dropped	dropped	Zotu923	0	0	0	0	0	0	0	0	0	0	0	0	0	0	0	0	0	0	0	0	0	0	0	0	0	0	0	0	0	0	0	0	0	0	0	0	0	0	1	0	2	0
Eukaryota	Mollusca	Bivalvia	Pectinida	Spondylidae	Spondylus	Spondylus sinensis	Zotu1119	0	0	0	0	0	0	0	0	0	0	0	0	0	0	0	0	0	0	0	0	0	0	0	0	0	0	0	0	0	0	0	0	0	0	0	0	0	0	0	0	0	0
Eukaryota	Mollusca	Bivalvia	Pectinida	Spondylidae	Spondylus	Spondylus sinensis	Zotu1420	0	0	0	0	0	0	0	0	0	0	0	0	0	0	0	0	0	0	0	0	0	0	0	0	0	0	0	0	0	0	0	0	0	0	0	0	0	0	0	0	0	0
Eukaryota	Mollusca	Gastropoda	Aplysiida	Aplysiidae	dropped	dropped	Zotu17	0	0	0	0	0	0	0	0	0	0	0	0	0	0	0	0	0	0	0	0	0	0	0	0	0	0	0	0	0	0	0	0	0	0	0	0	0	0	0	0	1	0
Eukaryota	Mollusca	Gastropoda	Cephalaspidea	Gastropteridae	Sagaminopteron	Sagaminopteron psychedelicum	Zotu67	0	0	0	0	0	0	0	0	0	0	0	0	0	0	0	0	0	0	0	0	0	0	0	0	0	0	0	0	0	0	0	0	0	0	0	0	0	0	0	0	0	0
Eukaryota	Mollusca	Gastropoda		dropped	dropped	dropped	Zotu8	0	0	0	0	0	0	0	0	0	0	0	0	0	0	0	0	0	0	0	0	0	0	0	0	0	0	0	0	0	0	0	0	0	0	0	0	0	0	0	0	0	0
Eukaryota	Oomycota		Lagenidiales	Haliphthoraceae	dropped	dropped	Zotu1688	0	0	0	0	0	0	0	0	0	0	0	0	0	0	0	0	0	0	0	0	0	0	0	0	0	0	0	0	0	0	0	0	0	0	0	0	0	0	0	0	2	11
Eukaryota	Porifera	Demospongiae	Clionaida	Clionaidae	Cliona	Cliona sp. SI06x31	Zotu1797	0	0	0	0	0	0	0	0	0	0	0	0	0	0	0	0	0	0	0	0	0	0	0	0	0	0	0	0	0	0	0	0	0	0	0	0	0	0	6	1	1	1
Eukaryota	Porifera	Demospongiae	Clionaida	dropped	dropped	dropped	Zotu548	0	0	0	0	0	0	1	0	0	0	0	0	0	0	0	0	0	0	0	0	0	0	0	0	0	0	0	0	0	0	0	0	0	0	0	0	0	0	9	0	4	1
Eukaryota	Porifera	Demospongiae	Dictyoceratida	dropped	dropped	dropped	Zotu882	0	0	0	0	0	0	0	0	0	0	0	0	0	0	0	0	0	0	0	0	0	0	0	0	0	0	0	0	0	0	0	0	0	0	0	0	0	0	2	1	3	4
Eukaryota	Porifera	Demospongiae	Dictyoceratida	Irciniidae	Sarcotragus	Sarcotragus spinosulus	Zotu2658	0	0	0	0	0	0	0	0	0	0	0	0	0	0	0	0	0	0	0	0	0	0	0	0	0	0	0	0	0	0	0	0	0	0	0	0	0	0	5	0	2	2
Eukaryota	Porifera	Demospongiae	Dictyoceratida	Spongiidae	Spongia	Spongia tubulifera	Zotu905	0	0	0	0	0	0	0	0	0	0	0	0	0	0	0	0	0	0	0	0	0	0	0	0	0	0	0	0	0	0	0	0	0	0	0	0	0	0	17	0	20	15
Eukaryota	Porifera	Demospongiae	Dictyoceratida	Thorectidae	Petrosaspongia	Petrosaspongia nigra	Zotu2598	0	0	0	0	0	0	0	0	0	0	0	0	0	0	0	0	0	0	0	0	0	0	0	0	0	0	0	0	0	0	0	0	0	0	0	0	0	0	3	0	0	4
Eukaryota	Porifera	Demospongiae	dropped	dropped	dropped	dropped	Zotu722	0	0	0	0	0	0	0	0	0	0	0	0	0	0	0	0	0	0	0	0	0	0	0	0	0	0	0	0	0	0	0	0	0	0	0	0	0	0	10	0	10	3
Eukaryota	Porifera	Demospongiae	dropped	dropped	dropped	dropped	Zotu723	0	0	0	0	0	0	0	0	0	0	0	0	0	0	0	0	0	0	0	0	0	0	0	0	0	0	0	0	0	0	0	0	0	0	0	0	0	0	9	0	7	1
Eukaryota	Porifera	Demospongiae	dropped	dropped	dropped	dropped	Zotu1146	0	0	0	0	0	0	0	0	0	0	0	0	0	0	0	0	0	0	0	0	0	0	0	0	0	0	0	0	0	0	0	0	0	0	0	0	0	0	14	0	3	4
Eukaryota	Porifera	Demospongiae	dropped	dropped	dropped	dropped	Zotu1208	0	0	0	0	0	0	0	0	0	0	0	0	0	0	0	0	0	0	0	0	0	0	0	0	0	0	0	0	0	0	0	0	0	0	0	0	0	0	1	0	0	0
Eukaryota	Porifera	Demospongiae	dropped	dropped	dropped	dropped	Zotu1311	0	0	0	0	0	0	0	0	0	0	0	0	0	0	0	0	0	0	0	0	0	0	0	0	0	0	0	0	0	0	0	0	0	0	0	0	0	0	0	0	0	1
Eukaryota	Porifera	Demospongiae	dropped	dropped	dropped	dropped	Zotu1550	0	0	0	0	0	0	0	0	0	0	0	0	0	0	0	0	0	0	0	0	0	0	0	0	0	0	0	0	0	0	0	0	0	0	0	0	0	0	11	0	6	6
Eukaryota	Porifera	Demospongiae	Haplosclerida	Chalinidae	Haliclona	dropped	Zotu1990	0	0	0	0	0	0	0	0	0	0	0	0	0	0	0	0	0	0	0	0	0	0	0	0	0	0	0	0	0	0	0	0	0	0	0	0	0	0	3	0	3	1
Eukaryota	Porifera	Demospongiae	Haplosclerida	Chalinidae	Haliclona	dropped	Zotu2009	0	0	0	0	0	0	0	0	0	0	0	0	0	0	0	0	0	0	0	0	0	0	0	0	0	0	0	0	0	0	0	0	0	0	0	0	0	0	20	1	6	4
Eukaryota	Porifera	Demospongiae	Haplosclerida	Chalinidae	Haliclona	Haliclona mucifibrosa	Zotu1152	0	0	0	0	0	0	0	0	0	0	0	0	0	0	0	0	0	0	0	0	0	0	0	0	0	0	0	0	0	0	0	0	0	0	0	0	0	0	13	0	3	4
Eukaryota	Rhodophyta	Florideophyceae	Ceramiales	Ceramiaceae	Antithamnionella	dropped	Zotu1782	0	0	0	0	0	0	0	0	0	0	0	0	0	0	0	0	0	0	0	0	0	0	0	0	0	0	0	0	0	0	0	0	0	0	0	0	0	0	0	0	0	0
Eukaryota	Rhodophyta	Florideophyceae	Ceramiales	Rhodomelaceae	dropped	dropped	Zotu1209	0	0	0	0	0	0	0	0	0	0	0	0	0	0	0	0	0	0	0	0	0	0	0	0	0	0	0	0	0	0	0	0	0	0	0	0	0	0	3	0	1	0
Eukaryota	Rhodophyta	Florideophyceae	Ceramiales	Rhodomelaceae	dropped	dropped	Zotu1494	0	0	0	0	0	0	0	0	0	0	0	0	0	0	0	0	0	0	0	0	0	0	0	0	0	0	0	0	0	0	0	0	0	0	0	0	0	0	0	0	0	0
Eukaryota	Rhodophyta	Florideophyceae	Ceramiales	Rhodomelaceae	dropped	dropped	Zotu2563	0	0	0	0	0	0	0	0	0	0	0	0	0	0	0	0	0	0	0	0	0	0	0	0	0	0	0	0	0	0	0	0	0	0	0	0	0	0	0	0	0	0
Eukaryota	Rhodophyta	Florideophyceae	Ceramiales	Rhodomelaceae	dropped	dropped	Zotu2730	0	0	0	0	0	0	0	0	0	0	0	0	0	0	0	0	0	0	0	0	0	0	0	0	0	0	0	0	0	0	0	0	0	0	0	0	0	0	0	0	4	0
Eukaryota	Rhodophyta	Florideophyceae	Corallinales	dropped	dropped	dropped	Zotu2247	0	0	0	0	0	0	0	0	0	0	0	0	0	0	0	0	0	0	0	0	0	0	0	0	0	0	0	0	0	0	0	0	0	0	0	0	0	0	0	0	0	0
Eukaryota	Rhodophyta	Florideophyceae	Gigartinales	Peyssonneliaceae	Peyssonnelia	dropped	Zotu842	0	0	0	0	0	0	0	0	0	0	0	0	0	0	0	0	0	0	0	0	0	0	0	0	0	0	0	0	0	0	0	0	0	0	0	0	0	0	32	0	11	4
Eukaryota	Rhodophyta	Florideophyceae	Gigartinales	Peyssonneliaceae	Peyssonnelia	dropped	Zotu1959	0	0	0	0	0	0	0	0	0	0	0	0	0	0	0	0	0	0	0	0	0	0	0	0	0	0	0	0	0	0	0	0	0	0	0	0	0	0	0	0	0	1
Eukaryota	Rhodophyta	Florideophyceae	Gigartinales	Peyssonneliaceae	Peyssonnelia	dropped	Zotu2752	0	0	0	0	0	0	0	0	0	0	0	0	0	0	0	0	0	0	0	0	0	0	0	0	0	0	0	0	0	0	0	0	0	0	0	0	0	0	0	0	0	0
Eukaryota	Sipuncula		Phascolosomatiformes	Phascolosomatidae	Apionsoma	Apionsoma misakianum	Zotu206	0	0	0	0	0	0	0	0	0	0	0	0	0	0	0	0	0	0	0	0	0	0	0	0	0	0	0	0	0	0	0	0	0	0	0	0	0	0	0	0	0	0
Eukaryota		Acantharea	Arthracanthida	dropped	dropped	dropped	Zotu1342	0	0	0	0	0	0	0	0	0	0	0	0	0	0	0	0	0	0	0	0	0	0	0	0	0	0	0	0	0	0	0	0	0	0	0	0	0	0	0	0	0	0
Eukaryota		Bigyra	Bicosoecida		Caecitellus	Caecitellus parvulus	Zotu1886	0	0	0	0	0	0	0	0	0	0	0	0	0	0	0	0	0	0	0	0	0	0	0	0	0	0	0	0	0	0	0	0	0	0	0	0	0	0	0	1	0	0
Eukaryota		Bigyra	Thraustochytrida	Thraustochytriaceae	dropped	dropped	Zotu2487	0	0	0	0	0	0	0	0	0	0	0	0	0	0	0	0	0	0	0	0	0	0	0	0	0	0	0	0	0	0	0	0	0	0	0	0	0	0	0	0	0	0
Eukaryota		Bigyra	Thraustochytrida	Thraustochytriaceae	Labyrinthuloides	Labyrinthuloides minuta	Zotu896	0	0	0	0	0	0	0	0	0	0	0	0	0	0	0	0	0	0	0	0	0	0	0	0	0	0	0	0	0	0	0	0	0	0	0	0	0	0	2	0	5	3
Eukaryota		Bigyra	Thraustochytrida	Thraustochytriaceae	Thraustochytrium	dropped	Zotu2327	0	0	0	0	0	0	0	0	0	0	0	0	0	0	0	0	0	0	0	0	0	0	0	0	0	0	0	0	0	0	0	0	0	0	0	0	0	0	0	0	2	0
Eukaryota		Bigyra	Thraustochytrida	Thraustochytriaceae	Thraustochytrium	Thraustochytrium sp. HK10	Zotu1639	0	0	0	0	0	0	0	0	0	0	0	0	0	0	0	0	0	0	0	0	0	0	0	0	0	0	0	0	0	0	0	0	0	0	0	0	0	0	1	0	0	0
Eukaryota		Bigyra	Thraustochytrida	Thraustochytriaceae	Thraustochytrium	Thraustochytrium sp. HK5	Zotu990	0	0	0	0	0	0	0	0	0	0	0	0	0	0	0	0	0	0	0	0	0	0	0	0	0	0	0	0	0	0	0	0	0	0	0	0	0	0	4	0	1	1
Eukaryota		Bigyra	Thraustochytrida	Thraustochytriaceae	Thraustochytrium	Thraustochytrium sp. HK5	Zotu2036	0	0	0	0	0	0	0	0	0	0	0	0	0	0	0	0	0	0	0	0	0	0	0	0	0	0	0	0	0	0	0	0	0	0	0	0	0	0	0	0	0	0
Eukaryota		Dinophyceae	dropped	dropped	dropped	dropped	Zotu377	0	0	0	0	0	0	0	0	0	0	0	0	0	0	0	0	0	0	0	0	0	0	0	0	0	0	0	0	0	0	0	0	0	0	0	0	0	0	5	0	5	4
Eukaryota		Dinophyceae	dropped	dropped	dropped	dropped	Zotu926	0	0	0	0	0	0	0	0	0	0	0	0	0	0	0	0	0	0	0	0	0	0	0	0	0	0	0	0	0	0	0	0	0	0	0	0	0	0	0	0	0	0
Eukaryota		Dinophyceae	dropped	dropped	dropped	dropped	Zotu1644	0	0	0	0	0	0	0	0	0	0	0	0	0	0	0	0	0	0	0	0	0	0	0	0	0	0	0	0	0	0	0	0	0	0	0	0	0	0	0	1	0	0
Eukaryota		Dinophyceae	Gonyaulacales	Gonyaulacaceae	Gonyaulax	Gonyaulax polygramma	Zotu1406	0	0	0	0	0	0	0	0	0	0	0	0	0	0	0	0	0	0	0	0	0	0	0	0	0	0	0	0	0	0	0	0	0	0	0	0	0	0	0	0	0	0
Eukaryota		Dinophyceae	Gonyaulacales	Gonyaulacaceae	Gonyaulax	Gonyaulax polygramma	Zotu1628	0	0	0	0	0	0	0	0	0	0	0	0	0	0	0	0	0	0	0	0	0	0	0	0	0	0	0	0	0	0	0	0	0	0	0	0	0	0	0	0	0	0
Eukaryota		Dinophyceae	Gonyaulacales	Gonyaulacaceae	Gonyaulax	Gonyaulax polygramma	Zotu2722	0	0	0	0	0	0	0	0	0	0	0	0	0	0	0	0	0	0	0	0	0	0	0	0	0	0	0	0	0	0	0	0	0	0	0	0	0	0	0	0	0	0
Eukaryota		Dinophyceae	Gymnodiniales	Ceratoperidiniaeceae	Pseliodinium	Pseliodinium pirum	Zotu82	0	0	0	0	0	0	0	0	0	0	0	0	0	0	0	0	0	0	0	0	0	0	0	0	0	0	0	0	0	0	0	0	0	0	0	0	0	0	0	0	0	0
Eukaryota		Dinophyceae	Gymnodiniales	Gymnodiniaceae	Gymnodinium	Gymnodinium catenatum	Zotu184	0	0	0	0	0	0	0	0	0	0	0	0	0	0	0	0	0	0	0	0	0	0	0	0	0	0	0	0	0	0	0	0	0	0	0	0	0	0	0	0	0	0
Eukaryota		Dinophyceae	Gymnodiniales	Gymnodiniaceae	Paragymnodinium	Paragymnodinium asymmetricum	Zotu571	0	0	0	0	0	0	0	0	0	0	0	0	0	0	0	0	0	0	0	0	0	0	0	0	0	0	0	0	0	0	0	0	0	0	0	0	0	0	2	0	10	2
Eukaryota		Dinophyceae	Gymnodiniales			uncultured Gymnodinium	Zotu2135	0	0	0	0	0	0	0	0	0	0	0	0	0	0	0	0	0	0	0	0	0	0	0	0	0	0	0	0	0	0	0	0	0	0	0	0	0	0	0	0	0	0
Eukaryota		Dinophyceae	Suessiales	Symbiodiniaceae	Cladocopium	Cladocopium sp. clade C	Zotu1511	0	0	0	0	0	0	0	0	0	0	0	0	0	0	3	0	0	0	0	0	0	0	0	0	2	0	0	0	0	0	1	0	0	0	101	16	5	12	0	0	0	0
Eukaryota		Dinophyceae	Suessiales	Symbiodiniaceae	dropped	dropped	Zotu84	962	120	43	20	23	10	72	5	9	90	6	14	17	425	5621	49	24	24	19	8	648	255	653	163	2460	2226	8649	8	443	548	1232	48	72	427	7546	829	638	359	40	10	31	21
Eukaryota		Dinophyceae	Suessiales	Symbiodiniaceae	Symbiodinium	dropped	Zotu677	9	5	0	2	1	0	1	1	3	4	0	0	4	1	0	0	0	0	1	0	0	0	32	0	1	0	60	18	17	6	137	0	0	0	85	4	0	5	2	0	7	1
Eukaryota		Dinophyceae	Suessiales	Symbiodiniaceae	Symbiodinium	dropped	Zotu696	1	1	0	0	0	0	0	0	2	4	0	1	0	0	0	0	0	0	0	0	0	0	0	0	0	0	2	1	0	1	199	5	0	0	23	0	0	0	0	0	0	0
Eukaryota		Dinophyceae	Suessiales	Symbiodiniaceae	Symbiodinium	dropped	Zotu822	1	1	0	0	0	0	0	0	0	1	0	1	2	0	0	0	1	0	1	0	0	0	0	0	0	0	0	0	0	2	160	0	0	0	15	0	0	0	1	0	0	0
Eukaryota		Dinophyceae	Suessiales	Symbiodiniaceae	Symbiodinium	dropped	Zotu916	0	0	0	0	0	0	0	0	0	0	0	0	0	0	0	0	0	1	1	0	0	1	0	0	2	0	202	0	5	0	0	0	0	0	0	0	20	2	0	0	0	0
Eukaryota		Dinophyceae	Suessiales	Symbiodiniaceae	Symbiodinium	dropped	Zotu1066	1	0	0	0	1	0	0	0	0	0	0	1	2	0	0	0	0	0	0	0	0	0	0	0	0	0	74	0	0	1	13	0	2	0	2	0	0	0	1	0	0	0
Eukaryota		Dinophyceae	Suessiales	Symbiodiniaceae	Symbiodinium	dropped	Zotu1578	2	0	0	0	1	0	0	1	2	3	0	2	0	0	0	0	0	0	0	0	0	0	0	0	0	0	0	0	6	0	0	0	0	0	0	0	0	0	1	0	0	0
Eukaryota		Dinophyceae	Suessiales	Symbiodiniaceae	Symbiodinium	dropped	Zotu1756	0	0	0	0	0	0	0	0	0	0	0	0	0	0	4	0	0	0	0	0	0	0	0	0	0	0	0	0	0	0	0	0	0	0	0	0	0	2	0	1	1	0
Eukaryota		Dinophyceae	Suessiales	Symbiodiniaceae	Symbiodinium	dropped	Zotu2073	0	0	0	0	0	0	0	0	0	0	0	0	0	0	0	0	0	0	0	0	0	0	0	0	0	0	0	0	0	0	1	0	0	0	0	0	0	0	0	0	0	0
Eukaryota		Dinophyceae	Suessiales	Symbiodiniaceae	Symbiodinium	dropped	Zotu2131	1	0	0	0	1	1	0	0	0	0	0	0	0	0	0	0	0	0	0	0	0	0	0	5	0	0	0	0	0	0	0	0	0	0	47	15	0	0	0	0	1	0
Eukaryota		Dinophyceae	Suessiales	Symbiodiniaceae	Symbiodinium	Symbiodinium sp. clade E	Zotu1978	0	1	0	0	0	0	1	0	0	0	0	0	1	0	0	0	0	0	1	0	0	0	0	0	0	0	0	0	0	0	28	1	0	0	0	0	0	0	3	0	0	0
Eukaryota		Dinophyceae	Thoracosphaerales	Thoracosphaeraceae	Scrippsiella	dropped	Zotu503	0	0	0	0	0	0	0	0	0	0	0	0	0	0	0	0	0	0	0	0	0	0	0	0	0	0	0	0	0	0	0	0	0	0	0	0	0	0	2	0	0	5
Eukaryota		dropped	dropped	dropped	dropped	dropped	Zotu61	0	0	0	0	0	0	0	0	0	0	0	0	0	0	0	0	0	0	0	0	0	0	0	0	0	0	0	0	0	0	0	0	0	0	0	0	0	0	248	1	95	57
Eukaryota		dropped	dropped	dropped	dropped	dropped	Zotu64	0	0	0	0	0	0	0	0	0	0	0	0	0	0	0	0	0	0	0	0	0	0	0	0	0	0	0	0	0	0	0	0	0	0	0	0	0	0	10	1	7	3
Eukaryota		dropped	dropped	dropped	dropped	dropped	Zotu97	0	0	0	0	0	0	0	0	0	0	0	0	0	0	0	0	0	0	0	0	0	0	0	0	0	0	0	0	0	0	0	0	0	0	0	0	0	0	68	0	21	21
Eukaryota		dropped	dropped	dropped	dropped	dropped	Zotu101	0	0	0	0	0	0	0	0	0	0	0	0	0	0	0	0	0	0	0	0	0	0	0	0	0	0	0	0	0	0	0	0	0	0	0	0	0	0	140	4	77	60
Eukaryota		dropped	dropped	dropped	dropped	dropped	Zotu110	0	0	0	0	0	0	0	0	0	0	0	0	0	0	0	0	0	0	0	0	0	0	0	0	0	0	0	0	0	0	0	0	0	0	0	0	0	0	30	1	20	12
Eukaryota		dropped	dropped	dropped	dropped	dropped	Zotu134	0	0	0	0	0	0	0	0	0	0	0	0	0	0	0	0	0	0	0	0	0	0	0	0	0	0	0	0	0	0	0	0	0	0	0	0	0	0	55	0	34	32
Eukaryota		dropped	dropped	dropped	dropped	dropped	Zotu145	0	0	0	0	0	0	0	0	0	0	0	0	0	0	0	0	0	0	0	0	0	0	0	0	0	0	0	0	0	0	0	0	0	0	0	0	0	0	1	0	0	0
Eukaryota		dropped	dropped	dropped	dropped	dropped	Zotu189	0	0	0	0	0	0	0	0	0	0	0	0	0	0	0	0	0	0	0	0	0	0	0	0	0	0	0	0	0	0	0	0	0	0	0	0	0	0	0	0	3	1
Eukaryota		dropped	dropped	dropped	dropped	dropped	Zotu213	0	0	0	0	0	0	0	0	0	0	0	0	0	0	0	0	0	0	0	0	0	0	0	0	0	0	0	0	0	0	0	0	0	0	0	0	0	0	0	0	0	0
Eukaryota		dropped	dropped	dropped	dropped	dropped	Zotu229	0	0	0	0	0	0	0	0	0	0	0	0	0	0	0	0	0	0	0	0	0	0	0	0	0	0	0	0	0	0	0	0	0	0	0	0	0	0	18	7	8	13
Eukaryota		dropped	dropped	dropped	dropped	dropped	Zotu236	0	0	0	0	0	0	0	0	0	0	0	0	0	0	0	0	0	0	0	0	0	0	0	0	0	0	0	0	0	0	0	0	0	0	0	0	0	0	4	0	7	2
Eukaryota		dropped	dropped	dropped	dropped	dropped	Zotu242	0	0	0	0	0	0	0	0	0	0	0	0	0	0	0	0	0	0	0	0	0	0	0	0	0	0	0	0	0	0	0	0	0	0	0	0	0	0	6	1	2	2
Eukaryota		dropped	dropped	dropped	dropped	dropped	Zotu275	0	0	0	0	0	0	0	0	0	0	0	0	0	0	0	0	0	0	0	0	0	0	0	0	0	0	0	0	0	0	0	0	0	0	0	0	0	0	25	6	13	6
Eukaryota		dropped	dropped	dropped	dropped	dropped	Zotu314	0	0	0	0	0	0	0	0	0	0	0	0	0	0	0	0	0	0	0	0	0	0	0	0	0	0	0	0	0	0	0	0	0	0	0	0	0	0	0	1	0	0
Eukaryota		dropped	dropped	dropped	dropped	dropped	Zotu316	0	0	0	0	0	0	0	0	0	0	0	0	0	0	0	0	0	0	0	0	0	0	0	0	0	0	0	0	0	0	0	0	0	0	0	0	0	0	2	0	0	0
Eukaryota		dropped	dropped	dropped	dropped	dropped	Zotu398	0	0	0	0	0	0	0	0	0	0	0	0	0	0	0	0	0	0	0	0	0	0	0	0	0	0	0	0	0	0	0	0	0	0	0	0	0	0	1	0	0	0
Eukaryota		dropped	dropped	dropped	dropped	dropped	Zotu404	0	0	0	0	0	0	0	0	0	0	0	0	0	0	0	0	0	0	0	0	0	0	0	0	0	0	0	0	0	0	0	0	0	0	0	0	0	0	33	0	9	11
Eukaryota		dropped	dropped	dropped	dropped	dropped	Zotu414	0	0	0	0	0	0	0	0	0	0	0	0	0	0	0	0	0	0	0	0	0	0	0	0	0	0	0	0	0	0	0	0	0	0	0	0	0	0	4	0	5	3
Eukaryota		dropped	dropped	dropped	dropped	dropped	Zotu417	0	0	0	0	0	0	0	0	0	0	0	0	0	0	0	0	0	0	0	0	0	0	0	0	0	0	0	0	0	0	0	0	0	0	0	0	0	0	4	2	5	2
Eukaryota		dropped	dropped	dropped	dropped	dropped	Zotu435	0	0	0	0	0	0	0	0	0	0	0	0	0	0	0	0	0	0	0	0	0	0	0	0	0	0	0	0	0	0	0	0	0	0	0	0	0	0	0	0	0	0
Eukaryota		dropped	dropped	dropped	dropped	dropped	Zotu439	0	0	0	0	0	0	0	0	0	0	0	0	0	0	0	0	0	0	0	0	0	0	0	0	0	0	0	0	0	0	0	0	0	0	0	0	0	0	7	0	2	1
Eukaryota		dropped	dropped	dropped	dropped	dropped	Zotu479	0	0	0	0	0	0	0	0	0	0	0	0	0	0	0	0	0	0	0	0	0	0	0	0	0	0	0	0	0	0	0	0	0	0	0	0	0	0	0	0	0	0
Eukaryota		dropped	dropped	dropped	dropped	dropped	Zotu486	0	0	0	0	0	0	0	0	0	0	0	0	0	0	0	0	0	0	0	0	0	0	0	0	0	0	0	0	0	0	0	0	0	0	0	0	0	0	0	1	1	2
Eukaryota		dropped	dropped	dropped	dropped	dropped	Zotu559	0	0	0	0	0	0	0	0	0	0	0	0	0	0	0	0	0	0	0	0	0	0	0	0	0	0	0	0	0	0	0	0	0	0	0	0	0	0	86	2	15	8
Eukaryota		dropped	dropped	dropped	dropped	dropped	Zotu729	0	0	0	0	0	0	0	0	0	0	0	0	0	0	0	0	0	0	0	0	0	0	0	0	0	0	0	0	0	0	0	0	0	0	0	0	0	0	7	2	5	4
Eukaryota		dropped	dropped	dropped	dropped	dropped	Zotu852	0	0	0	0	0	0	0	0	0	0	0	0	0	0	0	0	0	0	0	0	0	0	0	0	0	0	0	0	0	0	0	0	0	0	0	0	0	0	1	1	2	4
Eukaryota		dropped	dropped	dropped	dropped	dropped	Zotu912	0	0	0	0	0	0	0	0	0	0	0	0	0	0	0	0	0	0	0	0	0	0	0	0	0	0	0	0	0	0	0	0	0	0	0	0	0	0	0	0	0	0
Eukaryota		dropped	dropped	dropped	dropped	dropped	Zotu977	0	0	0	0	0	0	0	0	0	0	0	0	0	0	0	0	0	0	0	0	0	0	0	0	0	0	0	0	0	0	0	0	0	0	0	0	0	0	4	0	0	2
Eukaryota		dropped	dropped	dropped	dropped	dropped	Zotu1021	0	0	0	0	0	0	0	0	0	0	0	0	0	0	0	0	0	0	0	0	0	0	0	0	0	0	0	0	0	0	0	0	0	0	0	0	0	0	0	0	0	0
Eukaryota		dropped	dropped	dropped	dropped	dropped	Zotu1125	0	0	0	0	0	0	0	0	0	0	0	0	0	0	0	0	0	0	0	0	0	0	0	0	0	0	0	0	0	0	0	0	0	0	0	0	0	0	25	1	12	6
Eukaryota		dropped	dropped	dropped	dropped	dropped	Zotu1167	0	0	0	0	0	0	0	0	0	0	0	0	0	0	0	0	0	0	0	0	0	0	0	0	0	0	0	0	0	0	0	0	0	0	0	0	0	0	0	0	0	1
Eukaryota		dropped	dropped	dropped	dropped	dropped	Zotu1241	0	0	0	0	0	0	0	0	0	0	0	0	0	0	0	0	0	0	0	0	0	0	0	0	0	0	0	0	0	0	0	0	0	0	0	0	0	0	15	2	1	0
Eukaryota		dropped	dropped	dropped	dropped	dropped	Zotu1402	0	0	0	0	0	0	0	0	0	0	0	0	0	0	0	0	0	0	0	0	0	0	0	0	0	0	0	0	0	0	0	0	0	0	0	0	0	0	1	0	0	4
Eukaryota		dropped	dropped	dropped	dropped	dropped	Zotu1589	0	0	0	0	0	0	0	0	0	0	0	0	0	0	0	0	0	0	0	0	0	0	0	0	0	0	0	0	0	0	0	0	0	0	0	0	0	0	8	0	2	0
Eukaryota		dropped	dropped	dropped	dropped	dropped	Zotu1793	0	0	0	0	0	0	0	0	0	0	0	0	0	0	0	0	0	0	0	0	0	0	0	0	0	0	0	0	0	0	0	0	0	0	0	0	0	0	7	0	2	1
Eukaryota		dropped	dropped	dropped	dropped	dropped	Zotu1816	0	0	0	0	0	0	0	0	0	0	0	0	0	0	0	0	0	0	0	0	0	0	0	0	0	0	0	0	0	0	0	0	0	0	0	0	0	0	0	0	0	0
Eukaryota		dropped	dropped	dropped	dropped	dropped	Zotu1821	0	0	0	0	0	0	0	0	0	0	0	0	0	0	0	0	0	0	0	0	0	0	0	0	0	0	0	0	0	0	0	0	0	0	0	0	0	0	0	0	0	0
Eukaryota		Phaeophyceae	Dictyotales	Dictyotaceae	Dictyota	dropped	Zotu2468	0	0	0	0	0	0	0	0	0	0	0	0	0	0	0	0	0	0	0	0	0	0	0	0	0	0	0	0	0	0	0	0	0	0	0	0	0	0	6	1	3	0
Eukaryota						dropped	Zotu11	0	0	0	0	0	0	0	0	0	0	0	0	0	0	0	0	0	0	0	0	0	0	0	0	0	0	0	0	0	0	0	0	0	0	0	0	0	0	0	0	0	0
Eukaryota						dropped	Zotu45	0	0	0	0	0	0	0	0	0	0	0	0	0	0	0	0	0	0	0	0	0	0	0	0	0	0	0	0	0	0	0	0	0	0	0	0	0	0	0	0	0	0
Eukaryota						dropped	Zotu71	0	0	0	0	0	0	0	0	0	0	0	0	0	0	0	0	0	0	0	0	0	0	0	0	0	0	0	0	0	0	0	0	0	0	0	0	0	0	70	3	15	6
Eukaryota						dropped	Zotu77	0	0	0	0	0	0	0	0	0	0	0	0	0	0	0	0	0	0	0	0	0	0	0	0	0	0	0	0	0	0	0	0	0	0	0	0	0	0	0	0	0	0
Eukaryota						dropped	Zotu79	0	0	0	0	0	0	0	0	0	0	0	0	0	0	0	0	0	0	0	0	0	0	0	0	0	0	0	0	0	0	0	0	0	0	0	0	0	0	0	0	1	0
Eukaryota						dropped	Zotu126	0	0	0	0	0	0	0	0	0	0	0	0	0	0	0	0	0	0	0	0	0	0	0	0	0	0	0	0	0	0	0	0	0	0	0	0	0	0	0	0	0	0
Eukaryota						dropped	Zotu152	0	0	0	0	0	0	0	0	0	0	0	0	0	0	0	0	0	0	0	0	0	0	0	0	0	0	0	0	0	0	0	0	0	0	0	0	0	0	8	0	1	3
Eukaryota						dropped	Zotu154	0	0	0	0	0	0	0	0	0	0	0	0	0	0	0	0	0	0	0	0	0	0	0	0	0	0	0	0	0	0	0	0	0	0	0	0	0	0	0	0	0	0
Eukaryota						dropped	Zotu185	0	0	0	0	0	0	0	0	0	0	0	0	0	0	0	0	0	0	0	0	0	0	0	0	0	0	0	0	0	0	0	0	0	0	0	0	0	0	0	0	0	0
Eukaryota						dropped	Zotu200	0	0	0	0	0	0	0	0	0	0	0	0	0	0	0	0	0	0	0	0	0	0	0	0	0	0	0	0	0	0	0	0	0	0	0	0	0	0	32	0	16	30
Eukaryota						dropped	Zotu204	0	0	0	0	0	0	0	0	0	0	0	0	0	0	0	0	0	0	0	0	0	0	0	0	0	0	0	0	0	0	0	0	0	0	0	0	0	0	119	0	56	34
Eukaryota						dropped	Zotu214	0	0	0	0	0	0	0	0	0	0	0	0	0	0	0	0	0	0	0	0	0	0	0	0	0	0	0	0	0	0	0	0	0	0	0	0	0	0	255	6	169	104
Eukaryota						dropped	Zotu234	0	0	0	0	0	0	0	0	0	0	0	0	0	0	0	0	0	0	0	0	0	0	0	0	0	0	0	0	0	0	0	0	0	0	0	0	0	0	36	0	14	23
Eukaryota						dropped	Zotu278	0	0	0	0	0	0	0	0	0	0	0	0	0	0	0	0	0	0	0	0	0	0	0	0	0	0	0	0	0	0	0	0	0	0	0	0	0	0	0	0	0	0
Eukaryota						dropped	Zotu294	0	0	0	0	0	0	0	0	0	0	0	0	0	0	0	0	0	0	0	0	0	0	0	0	0	0	0	0	0	0	0	0	0	0	0	0	0	0	0	0	0	0
Eukaryota						dropped	Zotu312	0	0	0	0	0	0	0	0	0	0	0	0	0	0	0	0	0	0	0	0	0	0	0	0	0	0	0	0	0	0	0	0	0	0	0	0	0	0	41	1	26	21
Eukaryota						dropped	Zotu313	0	0	0	0	0	0	0	0	0	0	0	0	0	0	0	0	0	0	0	0	0	0	0	0	0	0	0	0	0	0	0	0	0	0	0	0	0	0	6	0	4	3
Eukaryota						dropped	Zotu323	0	0	0	0	0	0	0	0	0	0	0	0	0	0	0	0	0	0	0	0	0	0	0	0	0	0	0	0	0	0	0	0	0	0	0	0	0	0	9	0	0	1
Eukaryota						dropped	Zotu401	0	0	0	0	0	0	0	0	0	0	0	0	0	0	0	0	0	0	0	0	0	0	0	0	0	0	0	0	0	0	0	0	0	0	0	0	0	0	11	1	4	6
Eukaryota						dropped	Zotu422	0	0	0	0	0	0	0	0	0	0	0	0	0	0	0	0	0	0	0	0	0	0	0	0	0	0	0	0	0	0	0	0	0	0	0	0	0	0	0	0	0	0
Eukaryota						dropped	Zotu453	0	0	0	0	0	0	0	0	0	0	0	0	0	0	0	0	0	0	0	0	0	0	0	0	0	0	0	0	0	0	0	0	0	0	0	0	0	0	24	3	46	8
Eukaryota						dropped	Zotu468	0	0	0	0	0	0	0	0	0	0	0	0	0	0	0	0	0	0	0	0	0	0	0	0	0	0	0	0	0	0	0	0	0	0	0	0	0	0	10	0	9	6
Eukaryota						dropped	Zotu469	0	0	0	0	0	0	0	0	0	0	0	0	0	0	0	0	0	0	0	0	0	0	0	0	0	0	0	0	0	0	0	0	0	0	0	0	0	0	0	0	0	0
Eukaryota						dropped	Zotu587	0	0	0	0	0	0	0	0	0	0	0	0	0	0	0	0	0	0	0	0	0	0	0	0	0	0	0	0	0	0	0	0	0	0	0	0	0	0	0	0	0	0
Eukaryota						dropped	Zotu598	0	0	0	0	0	0	0	0	0	0	0	0	0	0	0	0	0	0	0	0	0	0	0	0	0	0	0	0	0	0	0	0	0	0	0	0	0	0	7	0	3	0
Eukaryota						dropped	Zotu632	0	0	0	0	0	0	0	0	0	0	0	0	0	0	0	0	0	0	0	0	0	0	0	0	0	0	0	0	0	0	0	0	0	0	0	0	0	0	0	0	0	0
Eukaryota						dropped	Zotu738	0	0	0	0	0	0	0	0	0	0	0	0	0	0	0	0	0	0	0	0	0	0	0	0	0	0	0	0	0	0	0	0	0	0	0	0	0	0	0	0	0	0
Eukaryota						dropped	Zotu775	0	0	0	0	0	0	0	0	0	0	0	0	0	0	0	0	0	0	0	0	0	0	0	0	0	0	0	0	0	0	0	0	0	0	0	0	0	0	0	0	22	0
Eukaryota						dropped	Zotu788	0	0	0	0	0	0	0	0	0	0	0	0	0	0	0	0	0	0	0	0	0	0	0	0	0	0	0	0	0	0	0	0	0	0	0	0	0	0	25	0	1	0
Eukaryota						dropped	Zotu802	0	0	0	0	0	0	0	0	0	0	0	0	0	0	0	0	0	0	0	0	0	0	0	0	0	0	0	0	0	0	0	0	0	0	0	0	0	0	67	0	34	20
Eukaryota						dropped	Zotu880	0	0	0	0	0	0	0	0	0	0	0	0	0	0	0	0	0	0	0	0	0	0	0	0	0	0	0	0	0	0	0	0	0	0	0	0	0	0	0	0	0	0
Eukaryota						dropped	Zotu914	0	0	0	0	0	0	0	0	0	0	0	0	0	0	0	0	0	0	0	0	0	0	0	0	0	0	0	0	0	0	0	0	0	0	0	0	0	0	0	0	0	0
Eukaryota						dropped	Zotu1001	0	0	0	0	0	0	0	0	0	0	0	0	0	0	0	0	0	0	0	0	0	0	0	0	0	0	0	0	0	0	0	0	0	0	0	0	0	0	0	0	6	2
Eukaryota						dropped	Zotu1053	0	0	0	0	0	0	0	0	0	0	0	0	0	0	0	0	0	0	0	0	0	0	0	0	0	0	0	0	0	0	0	0	0	0	0	0	0	0	1	0	0	0
Eukaryota						dropped	Zotu1087	0	0	0	0	0	0	0	0	0	0	0	0	0	0	0	0	0	0	0	0	0	0	0	0	0	0	0	0	0	0	0	0	0	0	0	0	0	0	0	0	0	1
Eukaryota						dropped	Zotu1141	0	0	0	0	0	0	0	0	0	0	0	0	0	0	0	0	0	0	0	0	0	0	0	0	0	0	0	0	0	0	0	0	0	0	0	0	0	0	0	0	7	1
Eukaryota						dropped	Zotu1215	0	0	0	0	0	0	0	0	0	0	0	0	0	0	0	0	0	0	0	0	0	0	0	0	0	0	0	0	0	1	81	4	0	0	0	0	0	0	0	0	0	0
Eukaryota						dropped	Zotu1262	0	0	0	0	0	0	0	0	0	0	0	0	0	0	0	0	0	0	0	0	0	0	0	0	0	0	0	0	0	0	0	0	0	0	0	0	0	0	0	0	0	0
Eukaryota						dropped	Zotu1276	0	0	0	0	0	0	0	0	0	0	0	0	0	0	0	0	0	0	0	0	0	0	0	0	0	0	0	0	0	0	0	0	0	0	0	0	0	0	0	0	0	0
Eukaryota						dropped	Zotu1300	0	0	0	0	0	0	0	0	0	0	0	0	0	0	0	0	0	0	0	0	0	0	0	0	0	0	0	0	0	0	0	0	0	0	0	0	0	0	0	0	0	0
Eukaryota						dropped	Zotu1379	0	0	0	0	0	0	0	0	0	0	0	0	0	0	0	0	0	0	0	0	0	0	0	0	0	0	0	0	0	0	0	0	0	0	0	0	0	0	0	0	0	0
Eukaryota						dropped	Zotu1473	0	0	0	0	0	0	0	0	0	0	0	0	0	0	0	0	0	0	0	0	0	0	0	0	0	0	0	0	0	0	0	0	0	0	0	0	0	0	0	0	0	0
Eukaryota						dropped	Zotu1539	0	0	0	0	0	0	0	0	0	0	0	0	0	0	0	0	0	0	0	0	0	0	0	0	0	0	0	0	0	0	0	0	0	0	0	0	0	0	0	0	0	0
Eukaryota						dropped	Zotu1581	0	0	0	0	0	0	0	0	0	0	0	0	0	0	0	0	0	0	0	0	0	0	0	0	0	0	0	0	0	0	0	0	0	0	0	0	0	0	0	0	0	0
Eukaryota						dropped	Zotu1630	0	0	0	0	0	0	0	0	0	0	0	0	0	0	0	0	0	0	0	0	0	0	0	0	0	0	0	0	0	0	0	0	0	0	0	0	0	0	0	0	0	0
Eukaryota						dropped	Zotu1675	0	0	0	0	0	0	0	0	0	0	0	0	0	0	0	0	0	0	0	0	0	0	0	0	0	0	0	0	0	0	0	0	0	0	0	0	0	0	1	0	0	0
Eukaryota						dropped	Zotu1689	0	0	0	0	0	0	0	0	0	0	0	0	0	0	0	0	0	0	0	0	0	0	0	0	0	0	0	0	0	0	0	0	0	0	0	0	0	0	1	0	0	0
Eukaryota						dropped	Zotu1698	0	0	0	0	0	0	0	0	0	0	0	0	0	0	0	0	0	0	0	0	0	0	0	0	0	0	0	0	0	0	0	0	0	0	0	0	0	0	0	0	0	0
Eukaryota						dropped	Zotu1826	0	0	0	0	0	0	0	0	0	0	0	0	0	0	0	0	0	0	0	0	0	0	0	0	0	0	0	0	0	0	0	0	0	0	0	0	0	0	11	0	3	4
Eukaryota						dropped	Zotu2204	0	0	0	0	0	0	0	0	0	0	0	0	0	0	0	0	0	0	0	0	0	0	0	0	0	0	0	0	0	0	0	0	0	0	0	0	0	0	3	0	0	0
Eukaryota						dropped	Zotu2283	0	0	0	0	0	0	0	0	0	0	0	0	0	0	0	0	0	0	0	0	0	0	0	0	0	0	0	0	0	0	0	0	0	0	0	0	0	0	5	0	0	2
Eukaryota						dropped	Zotu2309	0	0	0	0	0	0	0	0	0	0	0	0	0	0	0	0	0	0	0	0	0	0	0	0	0	0	0	0	0	0	0	0	0	0	0	0	0	0	0	0	0	0
Eukaryota						dropped	Zotu2393	0	0	0	0	0	0	0	0	0	0	0	0	0	0	0	0	0	0	0	0	0	0	0	0	0	0	0	0	0	0	0	0	0	0	0	0	0	0	1	0	0	0
Eukaryota						dropped	Zotu2504	0	0	0	0	0	0	0	0	0	0	0	0	0	0	0	0	0	0	0	0	0	0	0	0	0	0	0	0	0	0	0	0	0	0	0	0	0	0	5	0	5	3
Eukaryota						eukaryotic picoplankton environmental sample	Zotu354	0	0	0	0	0	0	0	0	0	0	0	0	0	0	0	0	0	0	0	0	0	0	0	0	0	0	0	0	0	0	0	0	0	0	0	0	0	0	0	0	0	0
Eukaryota						uncultured eukaryote	Zotu9	0	0	0	0	0	0	0	0	0	0	0	0	0	0	0	0	0	0	0	0	0	0	0	0	0	0	0	0	0	0	0	0	0	0	0	0	0	0	0	0	0	0
Eukaryota						uncultured eukaryote	Zotu14	0	0	0	0	0	0	0	0	0	0	0	0	0	0	0	0	0	0	0	0	0	0	0	0	0	0	0	0	0	0	0	0	0	0	0	0	0	0	1036	54	421	177
Eukaryota						uncultured eukaryote	Zotu16	0	0	0	0	0	0	0	0	0	0	0	0	0	0	0	0	0	0	0	0	0	0	0	0	0	0	0	0	0	0	0	0	0	0	0	0	0	0	0	0	0	0
Eukaryota						uncultured eukaryote	Zotu25	0	0	0	0	0	0	0	0	0	0	0	0	0	0	0	0	0	0	0	0	0	0	0	0	0	0	0	0	0	0	0	0	0	0	0	0	0	0	0	1	0	0
Eukaryota						uncultured eukaryote	Zotu31	0	0	0	0	0	0	0	0	0	0	0	0	0	0	0	0	0	0	0	0	0	0	0	0	0	0	0	0	0	0	0	0	0	0	0	0	0	0	0	0	0	0
Eukaryota						uncultured eukaryote	Zotu42	0	0	0	0	0	0	0	0	0	0	0	0	0	0	0	0	0	0	0	0	0	0	0	0	0	0	0	0	0	0	0	0	0	0	0	0	0	0	0	0	0	1
Eukaryota						uncultured eukaryote	Zotu52	0	0	0	0	0	0	0	0	0	0	0	0	0	0	0	0	0	0	0	0	0	0	0	0	0	0	0	0	0	0	0	0	0	0	0	0	0	0	0	0	0	3
Eukaryota						uncultured eukaryote	Zotu99	0	0	0	0	0	0	0	0	0	0	0	0	0	0	0	0	0	0	0	0	0	0	0	0	0	0	0	0	0	0	0	0	0	0	0	0	0	0	0	0	0	0
Eukaryota						uncultured eukaryote	Zotu153	0	0	0	0	0	0	0	0	0	0	0	0	0	0	0	0	0	0	0	0	0	0	0	0	0	0	0	0	0	0	0	0	0	0	0	0	0	0	284	0	130	83
Eukaryota						uncultured eukaryote	Zotu163	0	0	0	0	0	0	1	0	2	0	0	0	1	0	0	0	0	0	0	0	0	0	0	0	0	0	0	0	0	0	0	0	0	0	0	0	0	0	172	0	27	19
Eukaryota						uncultured eukaryote	Zotu220	0	0	0	0	0	0	0	0	0	0	0	0	0	0	0	0	0	0	0	0	0	0	0	0	0	0	0	0	0	0	0	0	0	0	0	0	0	0	0	0	0	0
Eukaryota						uncultured eukaryote	Zotu329	0	0	0	0	0	0	0	0	0	0	0	0	0	0	0	0	0	0	0	0	0	0	0	0	0	0	0	0	0	0	0	0	0	0	0	0	0	0	75	0	47	30
Eukaryota						uncultured eukaryote	Zotu355	0	0	0	0	0	0	0	0	0	0	0	0	0	0	0	0	0	0	0	0	0	0	0	0	0	0	0	0	0	0	0	0	0	0	0	0	0	0	3	0	5	0
Eukaryota						uncultured eukaryote	Zotu370	0	0	0	0	0	0	0	0	0	0	0	0	0	0	0	0	0	0	0	0	0	0	0	0	0	0	0	0	0	0	0	0	0	0	0	0	0	0	0	0	3	0
Eukaryota						uncultured eukaryote	Zotu381	0	0	0	0	0	0	0	0	0	0	0	0	0	0	0	0	0	0	0	0	0	0	0	0	0	0	0	0	0	0	0	0	0	0	0	0	0	0	94	3	47	18
Eukaryota						uncultured eukaryote	Zotu387	0	0	0	0	0	0	0	0	0	0	0	0	0	0	0	0	0	0	0	0	0	0	0	0	0	0	0	0	0	0	0	0	0	0	0	0	0	0	0	0	0	0
Eukaryota						uncultured eukaryote	Zotu395	0	0	0	0	0	0	0	0	0	0	0	0	0	0	0	0	0	0	0	0	0	0	0	0	0	0	0	0	0	0	0	0	0	0	0	0	0	0	4	0	2	1
Eukaryota						uncultured eukaryote	Zotu407	0	0	0	0	0	0	0	0	0	0	0	0	0	0	0	0	0	0	0	0	0	0	0	0	0	0	0	0	0	0	0	0	0	0	0	0	0	0	7	0	1	1
Eukaryota						uncultured eukaryote	Zotu421	0	0	0	0	0	0	0	0	0	0	0	0	0	0	0	0	0	0	0	0	0	0	0	0	0	0	0	0	0	0	0	0	0	0	0	0	0	0	134	0	4	0
Eukaryota						uncultured eukaryote	Zotu440	0	0	0	0	0	0	0	0	0	0	0	0	0	0	0	0	0	0	0	0	0	0	0	0	0	0	0	0	0	0	0	0	0	0	0	0	0	0	1	0	0	0
Eukaryota						uncultured eukaryote	Zotu473	0	0	0	0	0	0	0	0	0	0	0	0	0	0	0	0	0	0	0	0	0	0	0	0	0	0	0	0	0	0	0	0	0	0	0	0	0	0	0	0	0	0
Eukaryota						uncultured eukaryote	Zotu532	0	0	0	0	0	0	0	0	0	0	0	0	0	0	0	0	0	0	0	0	0	0	0	0	0	0	0	0	0	0	0	0	0	0	0	0	0	0	0	0	0	0
Eukaryota						uncultured eukaryote	Zotu625	0	0	0	0	0	0	0	0	0	0	0	0	0	0	0	0	0	0	0	0	0	0	0	0	0	0	0	0	0	0	0	0	0	0	0	0	0	0	0	0	0	0
Eukaryota						uncultured eukaryote	Zotu713	0	0	0	0	0	0	0	0	0	0	0	0	0	0	0	0	0	0	0	0	0	0	0	0	0	0	0	0	0	0	0	0	0	0	0	0	0	0	0	0	0	0
Eukaryota						uncultured eukaryote	Zotu766	0	0	0	0	0	0	0	0	0	0	0	0	0	0	0	0	0	0	0	0	0	0	0	0	0	0	0	0	0	0	0	0	0	0	0	0	0	0	0	0	0	0
Eukaryota						uncultured eukaryote	Zotu776	0	0	0	0	0	0	0	0	0	0	0	0	0	0	0	0	0	0	0	0	0	0	0	0	0	0	0	0	0	0	0	0	0	0	0	0	0	0	18	0	12	4
Eukaryota						uncultured eukaryote	Zotu971	0	0	0	0	0	0	0	0	0	0	0	0	0	0	0	0	0	0	0	0	0	0	0	0	0	0	0	0	0	0	0	0	0	0	0	0	0	0	0	0	0	0
Eukaryota						uncultured eukaryote	Zotu1070	0	0	0	0	0	0	0	0	0	0	0	0	0	0	0	0	0	0	0	0	0	0	0	0	0	0	0	0	0	0	0	0	0	0	0	0	0	0	0	0	0	0
Eukaryota						uncultured eukaryote	Zotu1122	0	0	0	0	0	0	0	0	0	0	0	0	0	0	0	0	0	0	0	0	0	0	0	0	0	0	0	0	0	0	0	0	0	0	0	0	0	0	11	0	9	6
Eukaryota						uncultured eukaryote	Zotu1126	0	0	0	0	0	0	0	0	0	0	0	0	0	0	0	0	0	0	0	0	0	0	0	0	0	0	0	0	0	0	0	0	0	0	0	0	0	0	0	0	0	0
Eukaryota						uncultured eukaryote	Zotu1183	0	0	0	0	0	0	0	0	0	0	0	0	0	0	0	0	0	0	0	0	0	0	0	0	0	0	0	0	0	0	0	0	0	0	0	0	0	0	4	0	1	0
Eukaryota						uncultured eukaryote	Zotu1435	0	0	0	0	0	0	0	0	0	0	0	0	0	0	0	0	0	0	0	0	0	0	0	0	0	0	0	0	0	0	0	0	0	0	0	0	0	0	0	0	0	0
Eukaryota						uncultured eukaryote	Zotu1462	0	0	0	0	0	0	0	0	0	0	0	0	0	0	0	0	0	0	0	0	0	0	0	0	0	0	0	0	0	0	0	0	0	0	0	0	0	0	0	0	0	0
Eukaryota						uncultured eukaryote	Zotu1530	0	0	0	0	0	0	0	0	0	0	0	0	0	0	0	0	0	0	0	0	0	0	0	0	0	0	0	0	0	0	0	0	0	0	0	0	0	0	9	1	4	3
Eukaryota						uncultured eukaryote	Zotu1591	0	0	0	0	0	0	0	0	0	0	0	0	0	0	0	0	0	0	0	0	0	0	0	0	0	0	0	0	0	0	0	0	0	0	0	0	0	0	3	0	1	0
Eukaryota						uncultured eukaryote	Zotu1600	0	0	0	0	0	0	0	0	0	0	0	0	0	0	0	0	0	0	0	0	0	0	0	0	0	0	0	0	0	0	0	0	0	0	0	0	0	0	4	0	0	0
Eukaryota						uncultured eukaryote	Zotu1607	0	0	0	0	0	0	0	0	0	0	0	0	0	0	0	0	0	0	0	0	0	0	0	0	0	0	0	0	0	0	0	0	0	0	0	0	0	0	0	0	0	0
Eukaryota						uncultured eukaryote	Zotu1716	0	0	0	0	0	0	0	0	0	0	0	0	0	0	0	0	0	0	0	0	0	0	0	0	0	0	0	0	0	0	0	0	0	0	0	0	0	0	0	0	1	2
Eukaryota						uncultured eukaryote	Zotu1727	0	0	0	0	0	0	0	0	0	0	0	0	0	0	0	0	0	0	0	0	0	0	0	0	0	0	0	0	0	0	0	0	0	0	0	0	0	0	0	0	0	0
Eukaryota						uncultured eukaryote	Zotu1736	0	0	0	0	0	0	0	0	0	0	0	0	0	0	0	0	0	0	0	0	0	0	0	0	0	0	0	0	0	0	0	0	0	0	0	0	0	0	0	0	0	0
Eukaryota						uncultured eukaryote	Zotu1777	0	0	0	0	0	0	0	0	0	0	0	0	0	0	0	0	0	0	0	0	0	0	0	0	0	0	0	0	0	0	0	0	0	0	0	0	0	0	0	0	0	0
Eukaryota						uncultured eukaryote	Zotu1838	0	0	0	0	0	0	0	0	0	0	0	0	0	0	0	0	0	0	0	0	0	0	0	0	0	0	0	0	0	0	0	0	0	0	0	0	0	0	6	0	3	0
Eukaryota						uncultured eukaryote	Zotu2020	0	0	0	0	0	0	0	0	0	0	0	0	0	0	0	0	0	0	0	0	0	0	0	0	0	0	0	0	0	0	0	0	0	0	0	0	0	0	3	0	0	1
Eukaryota						uncultured eukaryote	Zotu2123	0	0	0	0	0	0	0	0	0	0	0	0	0	0	0	0	0	0	0	0	0	0	0	0	0	0	0	0	0	0	0	0	0	0	0	0	0	0	0	0	0	0
Eukaryota						uncultured eukaryote	Zotu2262	0	0	0	0	0	0	0	0	0	0	0	0	0	0	0	0	0	0	0	0	0	0	0	0	0	0	0	0	0	0	0	0	0	0	0	0	0	0	0	0	3	0
Eukaryota						uncultured eukaryote	Zotu2328	0	0	0	0	0	0	0	0	0	0	0	0	0	0	0	0	0	0	0	0	0	0	0	0	0	0	0	0	0	0	0	0	0	0	0	0	0	0	0	0	0	0
Eukaryota						uncultured eukaryote	Zotu2339	0	0	0	0	0	0	0	0	0	0	0	0	0	0	0	0	0	0	0	0	0	0	0	0	0	0	0	0	0	0	0	0	0	0	0	0	0	0	0	0	0	0
Eukaryota						uncultured eukaryote	Zotu2421	0	0	0	0	0	0	0	0	0	0	0	0	0	0	0	0	0	0	0	0	0	0	0	0	0	0	0	0	0	0	0	0	0	0	0	0	0	0	0	0	0	0
Eukaryota						uncultured eukaryote	Zotu2459	0	0	0	0	0	0	0	0	0	0	0	0	0	0	0	0	0	0	0	0	0	0	0	0	0	0	0	0	0	0	0	0	0	0	0	0	0	0	0	0	0	0
Eukaryota						uncultured eukaryote	Zotu2463	0	0	0	0	0	0	0	0	0	0	0	0	0	0	0	0	0	0	0	0	0	0	0	0	0	0	0	0	0	0	0	0	0	0	0	0	0	0	1	0	3	0
Eukaryota						uncultured eukaryote	Zotu2549	0	0	0	0	0	0	0	0	0	0	0	0	0	0	0	0	0	0	0	0	0	0	0	0	0	0	0	0	0	0	0	0	0	0	0	0	0	0	0	0	1	1
Eukaryota						uncultured eukaryote	Zotu2666	0	0	0	0	0	0	0	0	0	0	0	0	0	0	0	0	0	0	0	0	0	0	0	0	0	0	0	0	0	0	0	0	0	0	0	0	0	0	0	0	0	0
Eukaryota						uncultured marine eukaryote	Zotu297	0	0	0	0	0	0	0	0	0	0	0	0	0	0	0	0	0	0	0	0	0	0	0	0	0	0	0	0	0	0	0	0	0	0	0	0	0	0	3	0	0	2
Eukaryota						uncultured marine eukaryote	Zotu2095	0	0	0	0	0	0	0	0	0	0	0	0	0	0	0	0	0	0	0	0	0	0	0	0	0	0	0	0	0	0	0	0	0	0	0	0	0	0	0	0	0	0
Eukaryota						uncultured metazoan	Zotu68	0	0	0	0	0	0	0	0	0	0	0	0	0	0	0	0	0	0	0	0	0	0	0	0	0	0	0	0	0	0	0	0	0	0	0	0	0	0	0	0	0	0
Eukaryota						uncultured stramenopile	Zotu642	0	0	0	0	0	0	0	0	0	0	0	0	0	0	0	0	0	0	0	0	0	0	0	0	0	0	0	0	0	0	0	0	0	0	0	0	0	0	68	0	16	10
[truncated: 32 more columns]

## Sheet: 18Suni_ZOTUS_CLEAN_WATER
S1 Appendix. 18Suni assay and ITS2 assay ZOTU assignment based on DNA isolated from seawater and oval butterflyfish (Chaetodon lunulatus) gut samples collected at 10 sites from Dongsha Atoll (Taiwan) in the South China Sea. The numbers in cells are the number of unique reads per ZOTU. BLANK4 refers to one of the extraction blanks that produced reads, indicated by the highlighted rows in yellow, w…
domain	phylum	class	order	family	genus	species	ZOTU	DGX1	DGX2	DGX3	DGX4	DGX5	DGX6	DGX7	DGX8	DGX9	DGX10	DGX11	DGX12	DGX13	DGX14	DGX15	DGX16	DGX17	DGX18	DGX19	DGX20	DGX21	DGX22	DGX23	DGX24	DGX25	DGX26	DGX27	DGX28	DGX29	DGX30	DGX31	DGX32	DGX33	DGX34	DGX35	DGX36
Eukaryota	Annelida	Polychaeta	Phyllodocida	Polynoidae	dropped	dropped	Zotu1866	0	0	0	0	0	0	0	0	0	0	0	0	0	2	0	0	0	2	0	0	0	0	0	0	1	0	0	0	0	27	0	0	0	0	0	0
Eukaryota	Annelida	Polychaeta	Spionida	Spionidae	Aurospio	Aurospio dibranchiata	Zotu388	0	0	0	0	1	0	0	0	0	0	0	0	0	0	0	456	0	0	0	0	0	0	0	0	1	0	0	0	0	0	0	0	0	0	0	8
Eukaryota	Annelida	Polychaeta	Terebellida	Terebellidae	Loimia	dropped	Zotu1950	0	0	0	0	0	0	0	0	0	0	0	0	0	0	0	0	0	0	0	0	0	0	0	0	8	0	18	0	6	10	0	0	0	0	0	0
Eukaryota	Annelida	Polychaeta		Capitellidae	Dasybranchus	dropped	Zotu2703	0	0	0	0	0	0	0	0	0	0	0	0	1	0	0	0	0	0	0	0	0	0	0	0	1	0	0	0	0	0	3	1	0	0	4	7
Eukaryota	Annelida	Polychaeta		Nerillidae	Leptonerilla	Leptonerilla sp. 'Scripps Aquarium'	Zotu2138	6	0	0	1	0	0	0	0	0	0	0	0	3	4	0	0	0	18	0	0	0	0	0	0	0	0	0	0	0	0	0	0	0	0	0	0
Eukaryota	Annelida	Polychaeta				Palpata sp. PO2	Zotu413	0	0	0	0	0	0	0	0	0	0	0	0	0	0	0	0	0	0	0	0	17	0	425	0	0	0	0	0	1	0	0	0	0	0	0	0
Eukaryota	Arthropoda	Hexanauplia	Calanoida	Pseudodiaptomidae	Pseudodiaptomus	Pseudodiaptomus nihonkaiensis	Zotu6	0	0	0	0	0	0	0	0	0	0	0	0	0	0	0	0	0	0	0	0	0	0	4	0	2	0	0	0	0	740	1478	0	93422	30796	0	713
Eukaryota	Arthropoda	Hexanauplia	Cyclopoida	dropped	dropped	dropped	Zotu28	0	0	0	0	0	0	0	137	0	0	0	0	0	0	0	0	0	0	0	0	0	0	27164	0	0	0	0	0	0	0	0	0	5	0	0	0
Eukaryota	Arthropoda	Hexanauplia	Cyclopoida	Xarifiidae	Xarifia	Xarifia sp. New Caledonia-RJH-2004	Zotu1662	0	0	0	0	0	0	0	0	0	0	0	0	0	3	0	0	0	0	0	0	0	0	0	0	0	0	0	0	0	0	0	0	35	0	0	0
Eukaryota	Arthropoda	Hexanauplia	Harpacticoida	Thalestridae	Parathalestris	Parathalestris verrucosa	Zotu646	0	0	0	0	0	0	0	0	0	0	0	0	1	0	2	0	0	0	0	0	0	0	0	0	0	0	13	0	0	0	1	3	0	4	9	300
Eukaryota	Arthropoda	Hexanauplia	Sessilia	dropped	dropped	dropped	Zotu702	0	0	0	0	0	0	0	0	0	0	0	0	0	0	0	0	0	0	0	0	0	0	0	0	0	0	0	56	12	189	0	0	0	0	0	0
Eukaryota	Arthropoda	Hexanauplia				dropped	Zotu1541	0	0	0	0	0	0	0	0	0	0	0	0	0	0	0	0	0	0	0	0	0	0	0	0	0	0	0	0	0	0	0	66	0	0	0	0
Eukaryota	Arthropoda	Malacostraca	Decapoda	dropped	dropped	dropped	Zotu1180	0	0	2	0	1	0	0	0	0	0	0	0	7	3	1	6	93	3	0	0	0	0	0	1	0	0	0	0	0	0	0	0	0	1	0	0
Eukaryota	Bacillariophyta	Bacillariophyceae	Thalassiophysales	Catenulaceae	Amphora	Amphora coffeiformis	Zotu2479	2	0	4	0	0	0	0	0	1	0	0	0	19	1	2	4	11	9	0	0	0	0	0	0	0	0	3	0	0	1	0	3	0	4	3	2
Eukaryota	Bacillariophyta	Coscinodiscophyceae	Rhizosoleniales	Rhizosoleniaceae	Dactyliosolen	Dactyliosolen blavyanus	Zotu505	0	0	0	0	0	0	97	55	1	22	66	64	17	5	6	1	19	4	0	0	1	0	0	0	3	0	17	1	0	1	0	0	0	0	0	0
Eukaryota	Bacillariophyta	Fragilariophyceae	Thalassionemales	Thalassionemataceae	Thalassionema	dropped	Zotu550	1	0	0	0	0	0	7	15	9	4	24	15	139	6	20	20	67	22	0	0	5	0	0	5	2	0	6	0	0	3	0	0	0	0	0	0
Eukaryota	Bacillariophyta					uncultured diatom	Zotu168	3	0	6	3	0	0	28	15	4	6	18	4	931	87	120	48	274	143	0	0	1	0	0	0	24	1	34	2	8	7	0	0	0	0	0	0
Eukaryota	Chlorophyta	dropped	dropped	dropped	dropped	dropped	Zotu1105	0	0	0	0	0	0	0	0	0	0	0	0	0	0	0	0	0	0	0	0	0	83	0	0	0	0	0	1	0	0	0	0	0	0	0	0
Eukaryota	Chlorophyta	Trebouxiophyceae	Chlorellales	Chlorellaceae	Nannochloris	Nannochloris sp. MBIC10749	Zotu774	0	0	0	0	0	0	0	0	0	0	0	0	13	0	0	0	0	0	10	0	8	95	22	4	0	0	0	0	0	1	0	0	0	0	0	0
Eukaryota	Chlorophyta	Ulvophyceae	Dasycladales	Polyphysaceae	Parvocaulis	Parvocaulis clavatus	Zotu1392	0	0	0	0	0	0	0	0	0	0	0	0	81	6	9	7	6	11	0	0	0	0	0	0	0	0	0	0	0	0	0	0	0	0	0	0
Eukaryota	Chlorophyta	Ulvophyceae	Dasycladales	Polyphysaceae	Parvocaulis	Parvocaulis parvulus	Zotu982	0	0	0	1	0	0	0	0	0	0	0	0	90	8	12	14	5	8	0	0	0	0	0	0	0	0	0	0	0	0	0	0	0	0	0	0
Eukaryota	Chlorophyta	Ulvophyceae	Dasycladales	Polyphysaceae	Parvocaulis	Parvocaulis parvulus	Zotu1009	0	0	1	1	0	0	0	0	0	0	0	0	84	15	8	9	1	19	0	0	0	0	0	0	0	0	0	0	0	0	0	0	0	0	0	0
Eukaryota	Chlorophyta	Ulvophyceae	Dasycladales	Polyphysaceae	Parvocaulis	Parvocaulis parvulus	Zotu1097	0	0	0	0	0	0	0	0	0	0	0	0	84	6	9	8	5	21	0	0	0	0	0	0	1	0	0	0	0	0	0	0	0	0	0	0
Eukaryota	Chlorophyta	Ulvophyceae	Dasycladales	Polyphysaceae	Parvocaulis	Parvocaulis parvulus	Zotu2126	0	0	0	0	0	0	0	0	0	0	0	0	48	1	3	1	3	4	0	0	0	0	0	0	0	0	1	0	0	0	0	0	0	0	0	0
Eukaryota	Chlorophyta	Ulvophyceae	Ulvales	dropped	dropped	dropped	Zotu2199	6	3	0	1	4	0	0	0	0	0	0	0	20	1	0	1	2	2	0	0	0	0	0	0	3	0	4	0	0	1	2	1	1	9	1	2
Eukaryota	Chordata	Actinopteri		Pomacentridae	Amphiprion	Amphiprion ocellaris	Zotu1585	2	0	2	0	0	0	3	0	0	0	0	0	37	8	10	4	17	7	0	0	1	0	0	0	1	0	1	0	0	0	0	0	0	0	0	0
Eukaryota	Chordata	Ascidiacea	Stolidobranchia	Styelidae	dropped	dropped	Zotu868	6	0	3	2	0	0	0	0	1	0	1	1	33	14	4	1	11	16	0	27	4	0	0	0	6	0	7	2	0	3	0	0	0	0	0	0
Eukaryota	Chordata	Ascidiacea	Stolidobranchia	Styelidae	dropped	dropped	Zotu1636	15	0	6	3	1	0	0	2	0	0	0	0	0	1	0	0	1	1	0	0	0	0	0	0	4	0	10	2	0	1	0	0	0	0	0	0
Eukaryota	Chordata	Ascidiacea	Stolidobranchia	Styelidae	dropped	dropped	Zotu2187	0	1	0	0	0	0	0	0	0	0	0	0	9	3	1	0	2	5	0	8	1	0	0	0	1	0	2	0	0	0	0	0	0	0	0	0
Eukaryota	Chordata	Ascidiacea	Stolidobranchia	Styelidae	Polycarpa	Polycarpa mytiligera	Zotu2249	0	0	4	0	0	0	0	0	0	0	0	0	0	0	0	0	0	1	0	0	24	0	0	3	3	0	3	0	3	0	0	0	0	0	0	0
Eukaryota	Ciliophora	dropped	dropped	dropped	dropped	dropped	Zotu1172	0	0	0	0	0	57	0	0	0	0	0	0	0	0	0	0	0	0	0	0	0	0	0	0	0	0	0	0	0	0	0	0	0	0	0	0
Eukaryota	Ciliophora	Litostomatea	Pleurostomatida	Litonotidae	Litonotus	Litonotus paracygnus	Zotu362	0	0	0	0	0	0	0	0	0	0	0	0	0	0	0	0	0	0	0	0	0	0	0	0	0	0	0	0	0	0	0	1	0	0	0	0
Eukaryota	Ciliophora	Litostomatea				Haptoria sp. bLaN1	Zotu111	0	0	0	0	0	0	0	0	0	0	0	0	0	0	0	0	0	0	0	0	0	0	0	0	0	0	3243	0	0	0	0	0	0	0	0	0
Eukaryota	Cnidaria	Anthozoa	Scleractinia	Acroporidae	Acropora	dropped	Zotu143	0	0	0	0	0	0	0	0	0	0	0	0	0	0	0	0	0	0	0	0	0	0	0	0	0	0	0	0	0	0	0	0	0	1	0	0
Eukaryota	Cnidaria	Anthozoa	Scleractinia	Acroporidae	Acropora	dropped	Zotu553	0	0	0	0	0	0	0	0	0	0	0	0	0	0	0	0	0	0	0	0	0	0	0	0	1	0	0	0	0	0	0	0	0	0	0	0
Eukaryota	Cnidaria	Anthozoa	Scleractinia	Acroporidae	Acropora	dropped	Zotu1559	0	0	0	0	0	0	0	0	0	0	0	0	0	0	0	0	0	0	0	0	23	0	0	0	0	0	1	0	0	0	0	0	0	0	0	0
Eukaryota	Cnidaria	Anthozoa	Scleractinia	Agariciidae	dropped	dropped	Zotu13	0	0	0	0	1	0	0	0	0	0	0	0	3	5	1	0	8	1	79	0	13	0	0	0	1	0	0	0	0	1	0	0	0	0	0	0
Eukaryota	Cnidaria	Anthozoa	Scleractinia	dropped	dropped	dropped	Zotu1	73	8	68	30	1	0	0	0	0	2	0	9	527	288	318	144	434	267	0	0	8	0	0	0	7	0	10	0	3	8	0	1	40	168	111	24
Eukaryota	Cnidaria	Anthozoa	Scleractinia	dropped	dropped	dropped	Zotu3	0	0	0	1	0	0	0	0	0	0	0	0	5	2	3	3	11	4	0	0	3	0	0	0	0	0	1	0	22	28	0	0	0	1	0	0
Eukaryota	Cnidaria	Anthozoa	Scleractinia	Pocilloporidae	dropped	dropped	Zotu32	0	0	0	0	0	0	0	0	0	0	0	0	0	0	3	0	0	0	0	0	13	0	0	2	37	9	178	260	68	123	0	0	0	0	0	0
Eukaryota	Cnidaria	Hydrozoa	Anthoathecata	dropped	dropped	dropped	Zotu2680	1	0	0	0	0	0	0	0	0	0	0	0	17	0	1	0	0	0	0	0	0	0	0	0	2	0	4	1	0	3	0	0	0	1	0	0
Eukaryota	dropped	dropped	dropped	dropped	dropped	dropped	Zotu7	0	0	0	0	0	0	0	0	1	0	0	0	0	0	12	7	0	0	0	73980	49	0	1	2	32011	13159	1	1622	1192	2065	0	0	0	0	0	0
Eukaryota	dropped	dropped	dropped	dropped	dropped	dropped	Zotu15	3928	24	1232	863	54	0	5373	3061	96	1069	4904	17821	30384	17260	4032	2753	12204	17136	0	0	35	0	0	0	490	0	461	48	38	145	2	1	2	0	7	1
Eukaryota	dropped	dropped	dropped	dropped	dropped	dropped	Zotu18	995	5	333	247	8	0	2594	1291	52	400	1537	3482	7615	5836	1465	966	4091	6519	0	0	5	0	0	0	258	0	304	43	31	82	0	4	2	0	8	7
Eukaryota	dropped	dropped	dropped	dropped	dropped	dropped	Zotu21	0	0	0	0	0	0	0	0	0	0	0	0	0	0	0	0	0	0	144	0	0	0	2	0	0	1	32780	0	0	45	0	0	0	0	0	0
Eukaryota	dropped	dropped	dropped	dropped	dropped	dropped	Zotu24	0	0	0	0	0	0	0	0	0	0	0	0	0	0	0	1	0	17	0	0	0	0	0	0	1	18341	2	0	0	22	0	0	0	0	0	0
Eukaryota	dropped	dropped	dropped	dropped	dropped	dropped	Zotu43	433	0	160	139	8	0	2412	1419	76	468	1969	3188	1034	660	232	158	443	655	0	0	0	0	0	0	104	0	107	18	8	33	0	0	0	0	0	0
Eukaryota	dropped	dropped	dropped	dropped	dropped	dropped	Zotu48	509	3	194	133	9	0	816	532	28	201	791	973	1518	1294	458	271	883	1079	0	0	13	0	0	0	96	0	144	12	10	44	0	0	0	0	5	0
Eukaryota	dropped	dropped	dropped	dropped	dropped	dropped	Zotu55	58	0	8	9	0	0	345	153	18	119	223	302	3328	658	922	351	1696	999	10	0	563	55	0	7	695	4	1041	111	67	262	2	1	0	9	6	2
Eukaryota	dropped	dropped	dropped	dropped	dropped	dropped	Zotu58	16	0	15	5	1	0	52	26	14	53	110	40	2481	188	404	208	3568	348	3	0	5	0	0	0	24	2	29	5	9	8	0	0	0	0	1	0
Eukaryota	dropped	dropped	dropped	dropped	dropped	dropped	Zotu66	97	7	2084	3473	17	0	0	0	1	0	0	8	0	3	0	0	0	0	0	0	0	0	0	0	11	1	5	0	0	4	0	0	0	0	0	0
Eukaryota	dropped	dropped	dropped	dropped	dropped	dropped	Zotu80	0	0	0	0	0	0	0	0	0	0	0	0	0	0	0	0	0	4	0	0	0	0	0	0	0	4166	0	0	1	12	0	0	0	0	0	0
Eukaryota	dropped	dropped	dropped	dropped	dropped	dropped	Zotu91	1646	18	487	323	25	0	268	177	8	70	172	202	41	18	14	3	15	19	0	0	1	0	0	0	9	0	4	1	0	2	0	0	0	0	0	0
Eukaryota	dropped	dropped	dropped	dropped	dropped	dropped	Zotu100	0	0	0	0	0	0	0	0	0	0	0	0	0	0	0	0	0	0	0	0	5	0	0	0	0	0	0	0	0	2820	0	0	0	0	0	0
Eukaryota	dropped	dropped	dropped	dropped	dropped	dropped	Zotu132	0	0	0	0	0	0	0	0	0	0	0	0	0	0	0	0	0	0	0	0	0	0	0	0	0	0	213	0	1	157	0	0	1982	0	0	1
Eukaryota	dropped	dropped	dropped	dropped	dropped	dropped	Zotu156	8	0	14	3	3	0	54	8	4	21	35	35	1032	133	164	71	334	171	0	0	1	0	0	0	4	0	1	0	0	0	21	12	3	23	13	18
Eukaryota	dropped	dropped	dropped	dropped	dropped	dropped	Zotu171	0	0	0	0	0	0	0	0	0	0	0	0	0	0	0	0	0	0	0	0	0	0	0	0	0	0	1	0	1	203	0	0	1533	0	0	0
Eukaryota	dropped	dropped	dropped	dropped	dropped	dropped	Zotu218	8	0	1	0	0	0	89	48	3	71	93	113	170	137	84	44	640	155	0	0	24	0	0	0	19	1	97	9	4	12	0	0	0	7	4	2
Eukaryota	dropped	dropped	dropped	dropped	dropped	dropped	Zotu226	44	1	15	13	1	0	494	201	9	81	254	348	17	2	2	0	2	3	0	0	6	0	0	0	5	0	5	3	1	0	0	0	0	0	0	0
Eukaryota	dropped	dropped	dropped	dropped	dropped	dropped	Zotu227	215	0	74	32	6	0	107	59	2	39	81	87	191	90	34	12	144	130	0	0	12	0	0	0	17	0	18	2	1	5	0	1	0	0	0	0
Eukaryota	dropped	dropped	dropped	dropped	dropped	dropped	Zotu254	101	1	58	33	1	0	54	35	9	20	43	86	2199	285	328	237	1016	491	0	0	260	57	0	6	221	0	341	37	19	76	20	5	5	276	49	37
Eukaryota	dropped	dropped	dropped	dropped	dropped	dropped	Zotu273	78	0	38	27	1	0	219	111	1	48	99	113	102	33	19	11	52	63	0	0	23	0	0	1	4	0	10	0	1	4	0	0	0	0	0	0
Eukaryota	dropped	dropped	dropped	dropped	dropped	dropped	Zotu274	264	4	123	71	10	0	587	287	23	160	347	366	84	38	22	15	59	35	0	0	96	0	0	0	71	0	82	10	16	25	0	0	0	0	0	0
Eukaryota	dropped	dropped	dropped	dropped	dropped	dropped	Zotu280	1	0	0	3	0	0	146	23	9	53	160	43	17	3	6	3	14	3	3	3	46	516	20	8	4	0	5	0	7	0	0	2	0	0	0	3
Eukaryota	dropped	dropped	dropped	dropped	dropped	dropped	Zotu310	1	0	0	2	0	0	0	0	0	1	0	2	0	0	7	0	0	2	0	0	0	0	0	0	154	1	562	5	9	10	0	0	0	0	0	0
Eukaryota	dropped	dropped	dropped	dropped	dropped	dropped	Zotu352	0	0	0	0	0	0	0	0	0	0	0	0	0	0	0	0	0	0	0	0	0	0	0	0	647	27	0	0	0	35	0	0	0	0	0	0
Eukaryota	dropped	dropped	dropped	dropped	dropped	dropped	Zotu356	5	0	0	0	0	0	36	22	25	6	7	11	480	17	39	5	9	1	0	0	1	0	0	0	5	1	1	0	1	0	0	0	0	0	0	2
Eukaryota	dropped	dropped	dropped	dropped	dropped	dropped	Zotu363	0	0	0	0	0	0	0	0	0	0	0	0	0	0	0	0	0	0	0	0	19	0	0	0	0	0	0	0	0	582	0	0	0	0	0	0
Eukaryota	dropped	dropped	dropped	dropped	dropped	dropped	Zotu365	6	0	6	1	0	0	247	84	31	27	106	21	33	4	3	2	12	5	6	0	7	5	9	2	7	0	8	0	0	1	0	0	0	0	0	0
Eukaryota	dropped	dropped	dropped	dropped	dropped	dropped	Zotu368	0	0	0	0	0	0	0	0	0	0	0	0	0	0	0	0	0	0	0	0	0	0	0	0	0	0	0	0	0	0	374	105	10	74	37	17
Eukaryota	dropped	dropped	dropped	dropped	dropped	dropped	Zotu396	39	2	6	14	0	0	92	21	29	54	135	66	14	9	8	2	11	7	1	0	12	48	0	0	2	1	7	0	7	1	2	0	0	0	0	0
Eukaryota	dropped	dropped	dropped	dropped	dropped	dropped	Zotu397	4	1	2	1	0	0	0	0	0	0	0	0	58	8	11	7	17	14	14	0	0	284	0	0	0	2	13	0	0	0	0	0	0	0	0	1
Eukaryota	dropped	dropped	dropped	dropped	dropped	dropped	Zotu432	3	0	0	3	0	0	44	11	1	6	10	41	76	38	13	12	9	22	0	0	3	0	0	1	29	0	27	1	3	7	0	0	0	0	0	0
Eukaryota	dropped	dropped	dropped	dropped	dropped	dropped	Zotu448	14	2	5	3	0	0	4	0	0	2	6	0	183	8	12	12	22	47	0	0	0	0	0	0	17	2	11	1	5	1	7	34	32	9	20	102
Eukaryota	dropped	dropped	dropped	dropped	dropped	dropped	Zotu455	112	4	70	51	5	0	3	12	5	8	16	20	52	15	9	4	6	18	0	0	1	0	0	0	9	0	15	3	1	7	1	0	0	0	0	2
Eukaryota	dropped	dropped	dropped	dropped	dropped	dropped	Zotu540	0	0	0	0	1	0	0	7	1	0	0	2	190	29	43	8	48	31	0	0	9	0	0	0	7	0	19	2	1	3	0	0	0	0	0	0
Eukaryota	dropped	dropped	dropped	dropped	dropped	dropped	Zotu549	8	0	0	9	0	0	11	16	0	7	46	22	55	26	20	12	7	48	0	0	0	0	0	0	8	0	17	3	5	8	0	0	0	1	1	0
Eukaryota	dropped	dropped	dropped	dropped	dropped	dropped	Zotu573	0	0	0	0	0	0	29	7	0	0	9	8	103	53	19	28	49	74	0	0	0	0	0	0	7	0	12	2	0	3	0	0	1	5	3	4
Eukaryota	dropped	dropped	dropped	dropped	dropped	dropped	Zotu743	0	0	0	0	0	0	0	0	0	0	0	0	7	1	0	0	1	0	0	0	0	0	0	0	0	48	0	0	0	0	0	0	21	15	0	204
Eukaryota	dropped	dropped	dropped	dropped	dropped	dropped	Zotu770	0	0	0	0	0	0	0	6	6	2	2	3	89	1	3	6	8	4	0	0	8	0	0	0	7	0	31	4	0	4	0	0	0	0	0	0
Eukaryota	dropped	dropped	dropped	dropped	dropped	dropped	Zotu885	0	0	0	0	0	0	0	0	0	0	0	0	0	0	1	0	1	0	0	0	6	120	0	0	0	1	5	0	0	0	0	0	0	0	0	0
Eukaryota	dropped	dropped	dropped	dropped	dropped	dropped	Zotu917	3	0	1	0	0	0	27	13	1	4	18	12	9	3	0	1	3	10	0	0	16	0	0	2	12	0	6	0	2	7	0	0	0	5	6	6
Eukaryota	dropped	dropped	dropped	dropped	dropped	dropped	Zotu921	9	0	2	0	0	0	0	0	0	0	0	0	70	5	6	8	14	1	0	0	16	50	0	0	0	0	1	0	1	0	0	0	0	0	0	0
Eukaryota	dropped	dropped	dropped	dropped	dropped	dropped	Zotu1169	7	0	2	0	0	0	9	16	0	8	20	11	8	1	1	0	0	6	0	0	0	0	0	0	0	0	0	0	0	0	0	0	0	0	0	0
Eukaryota	dropped	dropped	dropped	dropped	dropped	dropped	Zotu1218	0	0	0	0	0	0	0	4	0	0	0	0	9	4	0	1	4	3	0	0	24	12	0	0	3	0	7	1	0	3	0	0	0	0	0	0
Eukaryota	dropped	dropped	dropped	dropped	dropped	dropped	Zotu1281	0	1	0	0	0	0	9	13	2	0	8	8	19	6	2	2	0	2	0	0	0	0	0	0	0	0	2	0	0	0	0	0	0	1	0	0
Eukaryota	dropped	dropped	dropped	dropped	dropped	dropped	Zotu1305	7	0	6	2	0	0	0	3	0	1	2	1	0	0	0	0	0	3	0	0	0	0	0	0	0	1	0	0	0	1	2	0	0	30	8	12
Eukaryota	dropped	dropped	dropped	dropped	dropped	dropped	Zotu1315	0	0	0	0	0	0	0	0	0	0	0	0	0	0	0	0	0	0	27	0	28	0	2	0	0	0	0	0	0	0	0	0	0	0	0	0
Eukaryota	dropped	dropped	dropped	dropped	dropped	dropped	Zotu1362	0	0	0	0	0	0	0	0	0	0	0	0	0	0	0	0	0	0	26	0	0	70	0	0	0	0	0	0	11	8	0	0	0	0	0	0
Eukaryota	dropped	dropped	dropped	dropped	dropped	dropped	Zotu1738	0	0	0	0	0	0	5	0	0	0	0	0	0	0	1	1	0	0	0	0	21	13	0	2	0	0	1	0	2	0	0	0	0	0	0	0
Eukaryota	dropped	dropped	dropped	dropped	dropped	dropped	Zotu1781	0	0	0	0	0	0	0	0	0	0	0	0	0	0	0	0	0	0	0	0	0	0	0	37	0	0	0	0	1	0	2	0	2	0	62	4
Eukaryota	dropped	dropped	dropped	dropped	dropped	dropped	Zotu1830	11	0	9	12	0	0	0	1	0	1	0	1	2	0	0	0	0	0	0	0	0	0	0	2	0	0	1	0	0	0	0	0	0	0	0	0
Eukaryota	dropped	dropped	dropped	dropped	dropped	dropped	Zotu1875	0	0	0	0	0	0	0	0	0	0	0	0	4	0	1	1	22	5	1	0	0	0	0	0	2	0	2	1	0	1	0	0	0	0	0	0
Eukaryota	dropped	dropped	dropped	dropped	dropped	dropped	Zotu1899	0	0	0	0	0	0	0	0	0	0	0	0	4	2	0	1	1	3	0	0	0	0	0	0	0	0	0	0	1	0	12	3	2	9	15	22
Eukaryota	dropped	dropped	dropped	dropped	dropped	dropped	Zotu2130	0	0	0	0	0	25	0	0	0	0	0	0	0	0	0	0	0	0	0	0	0	0	0	0	0	0	0	0	0	0	0	0	0	0	0	0
Eukaryota	dropped	dropped	dropped	dropped	dropped	dropped	Zotu2652	0	0	0	0	0	0	0	0	0	0	0	0	0	0	5	1	6	1	1	0	0	0	0	0	2	0	0	0	0	0	0	0	0	0	0	0
Eukaryota	Mollusca	Bivalvia	Cardiida	dropped	dropped	dropped	Zotu1547	0	0	0	0	0	0	0	0	0	0	0	0	0	0	0	0	0	1	0	0	8	0	37	0	0	0	0	0	0	0	0	0	0	0	0	0
Eukaryota	Mollusca	Bivalvia	Limoida	Limidae	Limaria	Limaria hians	Zotu2366	0	0	0	0	0	0	0	0	0	0	1	0	0	0	0	0	0	0	0	0	0	0	0	0	0	0	0	0	0	0	0	0	0	0	0	20
Eukaryota	Mollusca	Bivalvia	Myida	Teredinidae	dropped	dropped	Zotu291	0	0	0	0	0	0	0	0	0	0	0	1	0	0	0	0	0	0	0	0	0	0	0	0	0	0	0	0	0	0	22	0	228	2	16	453
Eukaryota	Mollusca	Bivalvia	Myida	Teredinidae	dropped	dropped	Zotu650	0	7	2	0	0	0	0	0	0	0	0	49	0	0	0	0	0	0	0	0	0	0	0	0	0	0	0	0	0	0	18	9	123	10	1	8
Eukaryota	Mollusca	Bivalvia	Mytiloida	Mytilidae	dropped	dropped	Zotu2153	22	1	3	3	0	0	0	0	0	0	0	0	5	0	0	0	1	0	0	0	0	0	0	0	0	0	0	0	0	1	0	0	0	0	0	0
Eukaryota	Mollusca	Bivalvia	Pectinida	Pectinidae	dropped	dropped	Zotu923	1	0	2	0	0	0	0	0	0	0	0	0	0	0	0	0	0	0	0	0	100	0	0	0	2	0	0	0	0	0	0	0	0	0	0	0
Eukaryota	Mollusca	Bivalvia	Pectinida	Spondylidae	Spondylus	Spondylus sinensis	Zotu1119	0	0	0	0	0	0	0	0	0	0	0	0	0	0	0	0	0	0	0	0	84	0	0	3	0	0	0	0	0	0	0	0	0	0	0	0
Eukaryota	Mollusca	Bivalvia	Pectinida	Spondylidae	Spondylus	Spondylus sinensis	Zotu1420	0	0	0	0	0	0	6	10	0	2	22	6	0	0	0	0	0	0	0	0	0	0	0	0	0	0	0	0	0	0	0	0	0	0	0	0
Eukaryota	Mollusca	Gastropoda	Aplysiida	Aplysiidae	dropped	dropped	Zotu17	0	0	1	0	162	0	0	0	0	0	0	0	2	0	32790	3	5694	0	0	0	3	0	0	0	0	0	0	1	1	0	15	6482	514	1113	744	555
Eukaryota	Mollusca	Gastropoda	Cephalaspidea	Gastropteridae	Sagaminopteron	Sagaminopteron psychedelicum	Zotu67	0	0	0	0	0	0	0	0	0	0	0	0	0	0	0	0	5893	0	0	0	0	0	0	0	0	0	0	0	0	0	0	0	0	0	0	0
Eukaryota	Mollusca	Gastropoda		dropped	dropped	dropped	Zotu8	0	0	0	0	74	0	0	0	0	0	0	0	40181	234	4746	5766	13458	13295	0	1	15	0	0	0	0	0	85	12	0	154	43095	19871	3227	15895	21831	44868
Eukaryota	Oomycota		Lagenidiales	Haliphthoraceae	dropped	dropped	Zotu1688	0	0	2	11	0	0	0	0	0	0	0	0	0	1	0	0	0	1	0	0	0	0	0	0	0	0	1	0	0	0	7	5	0	6	2	20
Eukaryota	Porifera	Demospongiae	Clionaida	Clionaidae	Cliona	Cliona sp. SI06x31	Zotu1797	6	1	1	1	0	0	1	0	0	0	0	0	5	1	0	0	7	1	0	0	0	0	0	0	19	1	18	3	3	5	1	0	0	0	0	3
Eukaryota	Porifera	Demospongiae	Clionaida	dropped	dropped	dropped	Zotu548	9	0	4	1	0	0	0	1	0	1	0	1	176	58	25	21	84	28	0	0	0	0	0	0	0	0	0	0	0	0	0	1	0	0	0	0
Eukaryota	Porifera	Demospongiae	Dictyoceratida	dropped	dropped	dropped	Zotu882	2	1	3	4	1	0	0	0	0	0	0	0	106	34	18	7	23	31	0	0	0	0	0	0	17	0	37	2	2	6	0	0	0	0	0	2
Eukaryota	Porifera	Demospongiae	Dictyoceratida	Irciniidae	Sarcotragus	Sarcotragus spinosulus	Zotu2658	5	0	2	2	0	0	0	0	0	0	0	0	0	0	0	1	0	0	0	0	0	0	0	0	0	0	0	0	0	0	0	4	1	8	4	32
Eukaryota	Porifera	Demospongiae	Dictyoceratida	Spongiidae	Spongia	Spongia tubulifera	Zotu905	17	0	20	15	1	0	0	0	0	0	0	0	47	12	8	16	11	26	0	0	0	0	0	0	0	0	2	0	0	0	0	2	2	4	3	22
Eukaryota	Porifera	Demospongiae	Dictyoceratida	Thorectidae	Petrosaspongia	Petrosaspongia nigra	Zotu2598	3	0	0	4	0	0	0	0	0	0	0	0	2	3	0	1	3	4	0	0	0	0	0	0	2	0	2	0	0	1	0	0	1	3	0	13
Eukaryota	Porifera	Demospongiae	dropped	dropped	dropped	dropped	Zotu722	10	0	10	3	3	0	3	1	1	0	0	0	136	20	4	6	16	29	0	0	0	0	0	0	0	0	6	0	0	1	0	0	0	0	0	0
Eukaryota	Porifera	Demospongiae	dropped	dropped	dropped	dropped	Zotu723	9	0	7	1	0	0	19	1	3	3	26	2	25	10	10	4	5	16	0	0	0	0	0	0	0	0	1	1	1	1	6	10	6	149	25	128
Eukaryota	Porifera	Demospongiae	dropped	dropped	dropped	dropped	Zotu1146	14	0	3	4	0	0	0	0	0	0	0	0	62	17	9	5	15	27	0	0	0	0	0	0	4	0	5	1	0	2	0	0	1	2	1	2
Eukaryota	Porifera	Demospongiae	dropped	dropped	dropped	dropped	Zotu1208	1	0	0	0	0	0	0	0	0	0	0	0	0	0	0	0	1	1	0	0	0	0	0	0	0	0	0	0	0	0	0	1	0	61	7	88
Eukaryota	Porifera	Demospongiae	dropped	dropped	dropped	dropped	Zotu1311	0	0	0	1	0	0	2	0	0	0	1	0	1	0	0	0	0	1	0	0	0	0	0	0	0	0	0	0	0	0	0	0	1	44	6	43
Eukaryota	Porifera	Demospongiae	dropped	dropped	dropped	dropped	Zotu1550	11	0	6	6	0	5	0	0	1	0	0	0	12	2	2	0	1	7	0	0	0	0	0	0	0	0	2	0	0	0	0	0	0	0	0	4
Eukaryota	Porifera	Demospongiae	Haplosclerida	Chalinidae	Haliclona	dropped	Zotu1990	3	0	3	1	0	0	0	0	0	0	0	0	12	5	2	3	13	9	0	0	0	0	0	0	0	0	0	1	0	0	0	0	0	0	1	1
Eukaryota	Porifera	Demospongiae	Haplosclerida	Chalinidae	Haliclona	dropped	Zotu2009	20	1	6	4	0	0	1	4	1	0	1	2	9	0	0	1	0	13	0	0	0	0	0	0	0	0	0	0	0	0	0	0	0	3	0	2
Eukaryota	Porifera	Demospongiae	Haplosclerida	Chalinidae	Haliclona	Haliclona mucifibrosa	Zotu1152	13	0	3	4	1	0	0	1	0	0	0	1	25	11	4	2	9	20	0	0	0	0	0	0	0	0	0	0	0	0	0	0	0	0	0	0
Eukaryota	Rhodophyta	Florideophyceae	Ceramiales	Ceramiaceae	Antithamnionella	dropped	Zotu1782	0	0	0	0	0	0	0	0	0	0	0	0	30	0	2	0	0	1	0	0	0	0	0	0	0	0	0	0	0	0	0	0	0	0	0	0
Eukaryota	Rhodophyta	Florideophyceae	Ceramiales	Rhodomelaceae	dropped	dropped	Zotu1209	3	0	1	0	0	0	0	0	0	0	0	0	24	3	1	5	5	3	0	0	0	0	0	0	0	0	1	0	0	0	8	2	2	7	8	27
Eukaryota	Rhodophyta	Florideophyceae	Ceramiales	Rhodomelaceae	dropped	dropped	Zotu1494	0	0	0	0	0	0	0	0	0	0	0	0	14	2	0	11	27	7	0	0	0	0	0	0	0	0	1	0	0	0	1	0	0	0	0	0
Eukaryota	Rhodophyta	Florideophyceae	Ceramiales	Rhodomelaceae	dropped	dropped	Zotu2563	0	0	0	0	0	0	0	0	0	0	0	0	0	0	0	0	0	0	0	0	0	0	0	0	0	0	0	0	0	0	8	0	0	6	8	5
Eukaryota	Rhodophyta	Florideophyceae	Ceramiales	Rhodomelaceae	dropped	dropped	Zotu2730	0	0	4	0	0	0	0	0	0	0	0	0	14	5	0	1	28	6	0	0	5	0	0	0	0	0	0	0	0	0	0	1	0	0	0	0
Eukaryota	Rhodophyta	Florideophyceae	Corallinales	dropped	dropped	dropped	Zotu2247	0	0	0	0	1	0	0	0	0	0	0	0	46	1	0	2	2	4	0	0	0	0	0	0	1	0	1	0	1	2	0	0	0	0	0	0
Eukaryota	Rhodophyta	Florideophyceae	Gigartinales	Peyssonneliaceae	Peyssonnelia	dropped	Zotu842	32	0	11	4	2	0	0	0	0	0	0	0	54	2	2	10	6	10	0	0	0	0	0	0	0	0	0	0	0	2	0	0	0	0	0	0
Eukaryota	Rhodophyta	Florideophyceae	Gigartinales	Peyssonneliaceae	Peyssonnelia	dropped	Zotu1959	0	0	0	1	0	0	0	0	0	0	0	1	22	4	6	6	1	5	0	0	0	0	0	0	0	0	1	1	0	0	0	0	0	0	0	0
Eukaryota	Rhodophyta	Florideophyceae	Gigartinales	Peyssonneliaceae	Peyssonnelia	dropped	Zotu2752	0	0	0	0	0	0	0	0	0	0	0	0	2	3	0	2	2	8	0	0	0	0	0	0	0	0	0	0	0	0	0	0	0	0	0	0
Eukaryota	Sipuncula		Phascolosomatiformes	Phascolosomatidae	Apionsoma	Apionsoma misakianum	Zotu206	0	0	0	0	0	0	0	0	0	0	0	0	0	0	0	0	0	0	0	0	0	0	0	0	0	0	0	0	0	0	0	1199	0	0	0	0
Eukaryota		Acantharea	Arthracanthida	dropped	dropped	dropped	Zotu1342	0	0	0	0	0	0	0	0	0	0	0	0	0	0	0	0	0	0	0	0	38	49	0	0	0	0	5	0	1	0	0	0	0	0	0	0
Eukaryota		Bigyra	Bicosoecida		Caecitellus	Caecitellus parvulus	Zotu1886	0	1	0	0	0	0	0	0	0	0	0	0	30	1	0	0	0	0	0	0	0	0	0	0	0	0	0	0	0	0	0	0	0	1	0	0
Eukaryota		Bigyra	Thraustochytrida	Thraustochytriaceae	dropped	dropped	Zotu2487	0	0	0	0	1	0	0	0	0	0	0	0	0	0	0	0	0	0	0	0	0	0	0	0	0	0	0	0	0	0	5	1	2	2	3	9
Eukaryota		Bigyra	Thraustochytrida	Thraustochytriaceae	Labyrinthuloides	Labyrinthuloides minuta	Zotu896	2	0	5	3	0	0	0	0	1	0	0	0	14	1	1	0	4	7	0	0	0	0	0	0	1	0	0	1	0	1	21	25	3	11	14	48
Eukaryota		Bigyra	Thraustochytrida	Thraustochytriaceae	Thraustochytrium	dropped	Zotu2327	0	0	2	0	0	0	0	0	0	2	0	0	1	1	0	1	1	1	0	0	1	0	0	0	1	0	0	0	0	0	18	6	2	3	6	22
Eukaryota		Bigyra	Thraustochytrida	Thraustochytriaceae	Thraustochytrium	Thraustochytrium sp. HK10	Zotu1639	1	0	0	0	0	0	0	0	0	1	0	0	1	0	0	0	2	0	0	0	0	0	0	0	0	0	0	0	0	0	15	11	1	8	6	9
Eukaryota		Bigyra	Thraustochytrida	Thraustochytriaceae	Thraustochytrium	Thraustochytrium sp. HK5	Zotu990	4	0	1	1	1	0	0	0	0	0	0	0	8	0	0	1	2	0	0	0	0	0	0	0	0	0	2	0	0	0	22	17	2	9	19	38
Eukaryota		Bigyra	Thraustochytrida	Thraustochytriaceae	Thraustochytrium	Thraustochytrium sp. HK5	Zotu2036	0	0	0	0	0	0	0	0	0	0	0	0	1	0	0	1	1	0	0	0	0	0	0	0	0	0	0	0	0	0	5	5	1	5	7	11
Eukaryota		Dinophyceae	dropped	dropped	dropped	dropped	Zotu377	5	0	5	4	0	0	0	1	0	1	0	0	292	27	56	88	61	58	0	0	0	0	0	2	2	3	21	2	5	1	2	3	0	4	1	0
Eukaryota		Dinophyceae	dropped	dropped	dropped	dropped	Zotu926	0	0	0	0	0	0	0	1	25	4	0	1	53	0	2	6	5	0	0	0	4	1	2	0	81	2	49	1	1	3	0	1	0	0	0	0
Eukaryota		Dinophyceae	dropped	dropped	dropped	dropped	Zotu1644	0	1	0	0	0	0	0	2	0	5	0	0	1	0	1	1	0	1	5	0	5	30	0	0	7	0	8	0	5	2	0	0	0	0	0	0
Eukaryota		Dinophyceae	Gonyaulacales	Gonyaulacaceae	Gonyaulax	Gonyaulax polygramma	Zotu1406	0	0	0	0	0	0	0	0	0	0	0	0	0	0	0	2	0	1	43	0	0	1	1	0	0	0	2	0	0	1	0	0	0	0	0	0
Eukaryota		Dinophyceae	Gonyaulacales	Gonyaulacaceae	Gonyaulax	Gonyaulax polygramma	Zotu1628	0	0	0	0	0	0	0	0	0	0	0	0	48	0	0	0	0	0	0	0	0	39	0	0	1	0	1	0	0	1	0	0	0	0	0	0
Eukaryota		Dinophyceae	Gonyaulacales	Gonyaulacaceae	Gonyaulax	Gonyaulax polygramma	Zotu2722	0	0	0	0	0	0	0	0	0	0	0	0	0	0	0	0	0	0	13	10	0	0	0	0	0	0	3	0	0	1	0	0	0	0	0	0
Eukaryota		Dinophyceae	Gymnodiniales	Ceratoperidiniaeceae	Pseliodinium	Pseliodinium pirum	Zotu82	0	0	0	0	0	0	0	0	0	0	0	0	6	0	0	0	0	0	202	0	1	5339	22	0	7	2	25	2	1	1	0	0	0	0	0	0
Eukaryota		Dinophyceae	Gymnodiniales	Gymnodiniaceae	Gymnodinium	Gymnodinium catenatum	Zotu184	0	0	0	0	0	0	0	0	0	0	0	0	5	1	0	0	6	27	226	9	98	1151	230	23	20	3	82	7	45	13	1	0	1	0	0	0
Eukaryota		Dinophyceae	Gymnodiniales	Gymnodiniaceae	Paragymnodinium	Paragymnodinium asymmetricum	Zotu571	2	0	10	2	3	0	5	2	12	9	75	4	88	3	16	0	7	11	0	0	15	0	3	0	20	4	47	4	3	6	0	0	0	0	0	0
Eukaryota		Dinophyceae	Gymnodiniales			uncultured Gymnodinium	Zotu2135	0	0	0	0	0	0	0	0	0	0	0	0	0	0	0	0	0	0	0	0	15	0	31	0	0	0	1	0	0	0	1	0	1	1	0	2
Eukaryota		Dinophyceae	Suessiales	Symbiodiniaceae	Cladocopium	Cladocopium sp. clade C	Zotu1511	0	0	0	0	0	0	0	0	0	0	0	0	0	0	0	0	0	0	0	0	0	0	0	0	0	0	0	2	1	0	0	0	0	0	0	0
Eukaryota		Dinophyceae	Suessiales	Symbiodiniaceae	dropped	dropped	Zotu84	40	10	31	21	5	19	0	4	2	3	4	4	15	0	7	14	20	6	346	5	563	578	68	41	13	0	51	1	44	0	7	994	22	20	44	34
Eukaryota		Dinophyceae	Suessiales	Symbiodiniaceae	Symbiodinium	dropped	Zotu677	2	0	7	1	0	19	0	0	1	1	0	4	16	2	0	17	21	17	0	0	1	0	2	4	0	0	0	0	1	1	0	1	0	0	0	0
Eukaryota		Dinophyceae	Suessiales	Symbiodiniaceae	Symbiodinium	dropped	Zotu696	0	0	0	0	0	3	0	0	0	0	0	1	5	1	0	2	8	3	0	0	0	0	0	0	0	0	0	0	0	0	0	0	0	0	0	0
Eukaryota		Dinophyceae	Suessiales	Symbiodiniaceae	Symbiodinium	dropped	Zotu822	1	0	0	0	0	15	0	0	0	0	0	0	10	0	0	3	7	3	0	0	0	0	0	0	0	0	0	0	0	0	0	0	0	0	0	1
Eukaryota		Dinophyceae	Suessiales	Symbiodiniaceae	Symbiodinium	dropped	Zotu916	0	0	0	0	0	0	0	0	0	0	0	0	0	0	0	0	0	0	0	0	0	0	0	0	0	0	0	1	2	0	0	0	0	0	0	0
Eukaryota		Dinophyceae	Suessiales	Symbiodiniaceae	Symbiodinium	dropped	Zotu1066	1	0	0	0	0	8	0	0	0	0	1	1	4	0	1	1	1	2	0	0	0	0	0	0	0	0	0	0	0	0	0	0	0	0	0	0
Eukaryota		Dinophyceae	Suessiales	Symbiodiniaceae	Symbiodinium	dropped	Zotu1578	1	0	0	0	0	25	0	0	0	0	0	0	4	0	0	2	2	3	0	0	0	0	0	0	0	0	0	0	0	0	0	0	0	0	0	1
Eukaryota		Dinophyceae	Suessiales	Symbiodiniaceae	Symbiodinium	dropped	Zotu1756	0	1	1	0	0	12	0	0	0	0	0	0	0	0	0	0	1	0	0	0	0	0	5	0	4	1	4	0	4	3	4	1	0	2	4	2
Eukaryota		Dinophyceae	Suessiales	Symbiodiniaceae	Symbiodinium	dropped	Zotu2073	0	0	0	0	0	34	0	0	0	0	0	0	0	0	0	0	1	0	0	0	0	0	0	0	0	0	0	0	0	0	0	0	0	0	0	0
Eukaryota		Dinophyceae	Suessiales	Symbiodiniaceae	Symbiodinium	dropped	Zotu2131	0	0	1	0	0	0	0	0	0	0	0	0	2	0	3	0	0	0	0	0	0	0	0	0	0	0	1	1	0	0	0	0	0	0	0	0
Eukaryota		Dinophyceae	Suessiales	Symbiodiniaceae	Symbiodinium	Symbiodinium sp. clade E	Zotu1978	3	0	0	0	0	1	0	0	0	0	0	0	7	1	0	5	4	2	0	0	0	0	0	0	0	0	0	0	0	0	0	0	0	0	0	0
Eukaryota		Dinophyceae	Thoracosphaerales	Thoracosphaeraceae	Scrippsiella	dropped	Zotu503	2	0	0	5	0	0	0	15	32	10	0	0	69	2	3	16	1	6	48	2	286	6	33	0	109	9	144	10	17	3	0	0	0	0	1	1
Eukaryota		dropped	dropped	dropped	dropped	dropped	Zotu61	248	1	95	57	1	0	326	131	24	63	156	124	2472	509	314	204	624	1211	0	0	0	0	0	0	306	0	310	27	32	91	20	26	15	203	266	138
Eukaryota		dropped	dropped	dropped	dropped	dropped	Zotu64	10	1	7	3	0	0	4426	323	36	153	697	960	0	1	0	0	0	0	0	0	0	0	0	4	0	0	1	0	0	1	0	0	0	0	0	0
Eukaryota		dropped	dropped	dropped	dropped	dropped	Zotu97	68	0	21	21	3	0	393	233	219	107	327	327	1612	127	147	105	284	146	3764	78	6349	9928	5841	183	1436	159	4183	109	1141	497	1	0	0	0	0	0
Eukaryota		dropped	dropped	dropped	dropped	dropped	Zotu101	140	4	77	60	2	0	10	15	0	15	19	50	1303	206	42	95	689	1372	0	0	0	0	0	0	24	0	56	6	3	11	11	46	3	28	0	14
Eukaryota		dropped	dropped	dropped	dropped	dropped	Zotu110	30	1	20	12	0	0	648	245	87	100	205	228	698	146	123	54	196	189	0	0	10	0	0	0	91	0	103	7	26	31	7	3	0	33	18	17
Eukaryota		dropped	dropped	dropped	dropped	dropped	Zotu134	55	0	34	32	6	0	75	48	7	18	192	84	603	129	61	61	398	438	0	0	0	0	0	0	161	1	348	14	23	48	0	1	2	17	0	9
Eukaryota		dropped	dropped	dropped	dropped	dropped	Zotu145	1	0	0	0	0	0	0	1	6	11	15	3	136	8	9	37	28	7	536	6	647	1243	1342	82	167	11	344	7	183	56	0	0	0	2	0	0
Eukaryota		dropped	dropped	dropped	dropped	dropped	Zotu189	0	0	3	1	0	0	860	253	57	92	371	283	10	1	1	0	2	1	0	0	0	0	0	0	1	0	7	0	1	2	0	0	0	0	0	0
Eukaryota		dropped	dropped	dropped	dropped	dropped	Zotu213	0	0	0	0	0	0	0	0	0	0	0	0	3	0	0	0	0	1	11	0	0	1103	0	165	7	0	1	1	0	4	0	0	0	0	0	0
Eukaryota		dropped	dropped	dropped	dropped	dropped	Zotu229	18	7	8	13	4	590	41	4	17	3	11	10	149	10	24	18	43	12	2	0	2	7	23	0	27	4	71	1	36	10	46	21	2	19	16	19
Eukaryota		dropped	dropped	dropped	dropped	dropped	Zotu236	4	0	7	2	0	0	199	45	42	137	227	101	0	0	0	1	0	0	28	4	89	384	5	5	12	0	9	1	6	4	0	0	0	0	0	0
Eukaryota		dropped	dropped	dropped	dropped	dropped	Zotu242	6	1	2	2	1	0	3	4	6	0	4	4	45	3	20	16	12	7	176	7	300	584	147	26	53	6	277	9	83	37	0	0	0	0	0	0
Eukaryota		dropped	dropped	dropped	dropped	dropped	Zotu275	25	6	13	6	1	0	211	40	47	110	156	134	0	2	2	1	6	1	7	1	124	39	0	3	9	0	29	2	4	3	0	0	0	1	0	0
Eukaryota		dropped	dropped	dropped	dropped	dropped	Zotu314	0	1	0	0	0	0	0	0	0	0	0	0	0	0	0	0	0	0	1	0	185	535	3	0	0	0	0	0	0	0	0	0	0	0	0	0
Eukaryota		dropped	dropped	dropped	dropped	dropped	Zotu316	2	0	0	0	0	0	0	1	0	0	0	0	42	3	0	2	2	0	24	0	612	3	50	5	12	2	43	3	6	1	0	0	0	0	0	6
Eukaryota		dropped	dropped	dropped	dropped	dropped	Zotu398	1	0	0	0	0	0	7	11	11	20	19	7	297	22	11	19	26	20	22	0	12	0	2	2	50	5	123	3	6	13	1	1	2	3	4	3
Eukaryota		dropped	dropped	dropped	dropped	dropped	Zotu404	33	0	9	11	0	0	119	89	3	16	90	114	39	13	11	6	26	14	0	0	0	0	0	0	4	0	8	1	0	3	0	0	0	0	0	0
Eukaryota		dropped	dropped	dropped	dropped	dropped	Zotu414	4	0	5	3	0	0	4	0	0	0	0	0	52	5	1	2	5	2	3	1	51	259	35	2	0	0	11	0	11	0	0	0	0	1	0	0
Eukaryota		dropped	dropped	dropped	dropped	dropped	Zotu417	4	2	5	2	2	20	1	25	27	14	72	23	131	10	36	27	61	19	7	0	26	16	28	0	40	0	121	5	33	13	0	0	0	0	0	1
Eukaryota		dropped	dropped	dropped	dropped	dropped	Zotu435	0	0	0	0	0	0	0	0	0	0	9	1	13	0	0	3	10	0	30	2	300	221	172	0	5	0	12	0	3	4	0	0	0	0	1	0
Eukaryota		dropped	dropped	dropped	dropped	dropped	Zotu439	7	0	2	1	0	0	196	33	2	2	23	65	99	14	5	5	7	8	0	0	0	0	0	0	209	0	108	2	0	10	0	0	0	0	0	0
Eukaryota		dropped	dropped	dropped	dropped	dropped	Zotu479	0	0	0	0	0	0	269	46	2	8	78	83	4	1	0	0	0	3	0	0	0	0	0	0	0	0	2	0	0	2	0	0	0	0	0	0
Eukaryota		dropped	dropped	dropped	dropped	dropped	Zotu486	0	1	1	2	0	34	17	3	1	2	17	5	9	0	0	0	5	1	22	0	89	64	45	6	2	1	14	1	14	4	0	0	0	0	0	0
Eukaryota		dropped	dropped	dropped	dropped	dropped	Zotu559	86	2	15	8	0	0	18	0	1	2	0	0	108	6	14	15	7	4	0	0	76	5	0	2	71	5	34	3	2	5	0	0	0	0	0	0
Eukaryota		dropped	dropped	dropped	dropped	dropped	Zotu729	7	2	5	4	2	32	9	3	12	6	21	7	1	0	1	1	0	0	2	1	3	1	0	0	14	2	12	1	26	1	0	0	0	0	0	0
Eukaryota		dropped	dropped	dropped	dropped	dropped	Zotu852	1	1	2	4	0	9	2	0	1	0	1	0	19	2	11	4	9	14	22	0	12	50	7	1	0	0	5	0	2	2	0	0	1	0	0	0
Eukaryota		dropped	dropped	dropped	dropped	dropped	Zotu912	0	0	0	0	0	0	0	0	0	0	0	0	11	0	0	0	0	0	1	0	5	0	0	71	5	0	5	1	3	39	0	0	0	0	0	0
Eukaryota		dropped	dropped	dropped	dropped	dropped	Zotu977	4	0	0	2	0	0	0	0	0	0	0	0	49	0	0	1	0	33	0	0	1	26	13	0	14	4	22	0	0	0	13	9	0	4	0	1
Eukaryota		dropped	dropped	dropped	dropped	dropped	Zotu1021	0	0	0	0	0	0	0	0	0	0	0	0	0	0	0	0	0	0	0	0	0	0	0	6	0	0	3	0	103	9	0	0	0	0	0	0
Eukaryota		dropped	dropped	dropped	dropped	dropped	Zotu1125	25	1	12	6	0	0	14	3	0	4	12	4	7	5	1	3	7	6	0	0	10	0	0	1	2	0	3	0	0	2	0	0	0	0	0	0
Eukaryota		dropped	dropped	dropped	dropped	dropped	Zotu1167	0	0	0	1	0	0	0	0	0	0	0	0	7	3	4	1	3	6	2	0	16	16	0	2	3	0	3	0	0	0	1	0	0	4	8	9
Eukaryota		dropped	dropped	dropped	dropped	dropped	Zotu1241	15	2	1	0	0	0	6	2	14	0	0	14	58	1	3	0	6	0	3	0	18	21	10	0	10	1	19	0	13	3	14	0	0	2	0	0
Eukaryota		dropped	dropped	dropped	dropped	dropped	Zotu1402	1	0	0	4	1	2	5	0	1	2	1	1	6	0	0	0	6	1	0	0	18	3	4	0	10	0	5	0	9	3	0	0	0	1	0	0
Eukaryota		dropped	dropped	dropped	dropped	dropped	Zotu1589	8	0	2	0	0	0	21	3	0	1	0	10	8	17	16	12	8	9	3	0	4	0	0	0	11	0	18	2	4	5	0	0	0	0	0	0
Eukaryota		dropped	dropped	dropped	dropped	dropped	Zotu1793	7	0	2	1	0	0	0	0	0	1	4	1	62	3	0	2	11	1	11	0	27	26	16	0	4	1	12	2	5	6	0	1	0	0	0	0
Eukaryota		dropped	dropped	dropped	dropped	dropped	Zotu1816	0	0	0	0	0	0	0	0	0	0	0	0	0	0	0	0	0	0	10	0	0	0	28	0	3	0	0	0	0	3	0	0	0	0	0	0
Eukaryota		dropped	dropped	dropped	dropped	dropped	Zotu1821	0	0	0	0	0	0	0	0	0	0	0	0	0	0	0	0	0	0	0	0	38	0	0	0	1	0	1	0	0	1	0	0	0	0	0	0
Eukaryota		Phaeophyceae	Dictyotales	Dictyotaceae	Dictyota	dropped	Zotu2468	6	1	3	0	0	0	0	0	0	0	0	0	24	1	0	0	1	2	0	0	0	0	0	2	0	0	0	1	0	0	0	0	0	0	0	0
Eukaryota						dropped	Zotu11	0	0	0	0	0	0	0	0	0	0	0	0	0	6467	0	0	0	0	0	0	0	0	75301	12	24	0	1807	153	47	28	0	0	0	0	0	0
Eukaryota						dropped	Zotu45	0	0	0	0	0	0	8	2	1	1	4	4	15	1	0	1	20	0	127	9	718	11022	510	90	0	0	5	0	9	0	0	0	0	0	0	0
Eukaryota						dropped	Zotu71	70	3	15	6	4	0	785	141	153	64	341	289	5528	145	239	193	466	266	0	0	5	595	0	0	215	9	223	4	57	22	8	4	1	4	4	0
Eukaryota						dropped	Zotu77	0	0	0	0	0	0	0	0	0	0	0	0	0	0	0	0	0	0	347	0	4918	3	130	0	54	4	838	3	367	44	0	0	0	0	0	0
Eukaryota						dropped	Zotu79	0	0	1	0	0	0	8	0	1	2	20	1	7	0	3	2	5	0	70	5	387	4147	207	53	1	0	1	0	5	0	1	0	0	0	0	0
Eukaryota						dropped	Zotu126	0	0	0	0	0	0	0	0	0	0	0	0	0	17	0	0	0	0	1	0	2386	2	1784	0	27	0	240	3	173	26	0	0	0	0	0	0
Eukaryota						dropped	Zotu152	8	0	1	3	0	0	291	45	55	48	85	22	1862	103	89	47	74	80	0	0	15	0	35	0	49	7	58	0	26	8	1	0	0	0	0	0
Eukaryota						dropped	Zotu154	0	0	0	0	0	0	18	3	1	5	24	8	13	0	3	2	2	2	108	8	298	1383	20	66	2	0	0	0	1	0	0	0	0	0	0	0
Eukaryota						dropped	Zotu185	0	0	0	0	0	0	0	0	0	0	0	0	0	0	0	0	0	1	461	1	974	8	15	0	74	1	67	3	94	9	0	0	0	0	0	0
Eukaryota						dropped	Zotu200	32	0	16	30	0	0	20	13	8	1	18	64	44	4	0	8	0	5	0	0	0	0	0	3	820	7	555	30	85	177	2	0	2	2	1	7
Eukaryota						dropped	Zotu204	119	0	56	34	0	0	263	146	3	84	182	275	52	36	15	15	42	32	5	0	17	0	0	0	5	0	14	1	2	7	0	0	0	0	0	0
Eukaryota						dropped	Zotu214	255	6	169	104	1	0	418	309	36	128	412	370	777	165	140	95	225	299	0	0	240	0	0	0	66	0	98	8	18	40	0	0	0	0	4	0
Eukaryota						dropped	Zotu234	36	0	14	23	0	0	152	87	3	7	144	83	68	9	12	16	47	16	35	0	0	58	0	17	260	0	291	16	72	66	4	2	0	0	0	0
Eukaryota						dropped	Zotu278	0	0	0	0	0	0	0	0	0	0	0	0	0	0	0	0	0	0	0	1	538	248	0	0	16	4	0	0	3	3	0	0	0	0	0	0
Eukaryota						dropped	Zotu294	0	0	0	0	0	0	0	0	0	0	0	0	0	0	17	0	0	6	0	4	399	189	0	0	27	4	120	2	87	20	0	0	0	0	0	0
Eukaryota						dropped	Zotu312	41	1	26	21	2	0	257	128	5	73	173	304	54	17	11	6	25	33	0	0	77	0	0	1	8	0	23	4	4	3	0	0	0	0	0	0
Eukaryota						dropped	Zotu313	6	0	4	3	0	0	420	183	17	26	24	43	10	0	8	1	0	1	0	0	0	0	0	0	26	0	48	10	1	8	1	2	2	0	2	2
Eukaryota						dropped	Zotu323	9	0	0	1	0	0	243	114	6	32	105	176	28	2	2	2	2	1	1	0	4	1	0	0	36	0	18	3	0	3	0	0	0	0	0	0
Eukaryota						dropped	Zotu401	11	1	4	6	1	3	1	1	22	0	2	5	130	3	5	8	18	9	62	7	94	126	33	10	81	6	166	7	21	16	0	0	0	0	0	0
Eukaryota						dropped	Zotu422	0	0	0	0	0	0	0	0	0	0	0	1	104	11	8	7	9	48	2	0	143	0	0	3	154	1	127	7	21	24	8	8	2	0	0	13
Eukaryota						dropped	Zotu453	24	3	46	8	3	0	8	14	27	1	1	4	0	2	4	8	5	3	0	0	0	0	0	0	99	7	82	4	25	14	0	18	26	3	16	192
Eukaryota						dropped	Zotu468	10	0	9	6	0	0	127	100	2	30	83	122	21	6	3	4	10	10	0	0	18	0	0	0	5	0	5	2	1	0	0	0	0	0	0	0
Eukaryota						dropped	Zotu469	0	0	0	0	0	0	2	4	8	0	0	3	496	15	25	9	8	20	0	0	0	0	19	0	6	1	0	1	4	0	0	0	0	1	0	0
Eukaryota						dropped	Zotu587	0	0	0	0	0	0	0	0	0	0	0	0	18	2	2	3	0	0	0	0	129	0	0	37	10	0	18	2	2	5	2	0	0	0	0	0
Eukaryota						dropped	Zotu598	7	0	3	0	0	0	41	33	1	18	70	58	8	4	0	1	1	2	0	0	17	0	0	0	7	0	8	1	1	5	0	0	0	0	0	0
Eukaryota						dropped	Zotu632	0	0	0	0	0	0	0	3	0	0	0	0	5	0	0	0	0	0	0	0	10	287	0	0	22	0	31	6	13	10	0	0	0	0	0	0
Eukaryota						dropped	Zotu738	0	0	0	0	0	0	0	2	0	0	0	0	74	8	1	4	0	13	16	0	102	6	0	1	48	2	48	1	3	13	1	0	0	0	0	7
Eukaryota						dropped	Zotu775	0	0	22	0	0	0	0	0	0	0	0	0	0	0	0	0	0	0	0	0	0	0	0	0	27	8	89	4	56	44	0	0	0	0	0	0
Eukaryota						dropped	Zotu788	25	0	1	0	0	0	34	27	3	9	8	37	47	8	3	4	4	6	2	0	37	2	0	2	38	1	26	2	1	10	1	0	0	0	0	0
Eukaryota						dropped	Zotu802	67	0	34	20	2	0	0	2	0	0	1	10	0	2	3	0	1	1	0	0	1	0	0	0	5	0	2	1	0	2	0	0	0	0	0	0
Eukaryota						dropped	Zotu880	0	0	0	0	0	0	52	30	13	9	1	25	0	1	1	1	1	0	0	0	0	0	0	0	51	1	23	6	0	1	2	0	0	0	0	1
Eukaryota						dropped	Zotu914	0	0	0	0	0	0	0	0	0	0	0	0	128	0	3	3	10	7	0	0	0	0	0	2	0	0	0	0	0	2	0	0	0	0	0	0
Eukaryota						dropped	Zotu1001	0	0	6	2	0	0	1	2	0	0	0	2	4	2	1	0	6	2	2	0	157	0	0	9	10	1	12	2	9	4	0	0	0	1	0	0
Eukaryota						dropped	Zotu1053	1	0	0	0	0	0	31	33	0	10	15	13	0	0	1	1	0	0	0	0	0	0	0	0	0	0	5	0	1	0	0	0	0	0	0	0
Eukaryota						dropped	Zotu1087	0	0	0	1	0	0	13	1	1	0	12	1	12	0	1	4	4	3	0	0	66	0	0	8	15	0	39	2	11	12	0	0	0	0	0	0
Eukaryota						dropped	Zotu1141	0	0	7	1	0	0	2	5	1	0	1	6	42	0	1	0	1	0	1	0	0	7	1	0	39	5	31	1	17	3	0	0	0	0	1	0
Eukaryota						dropped	Zotu1215	0	0	0	0	0	0	0	1	0	0	0	0	0	0	0	0	0	0	0	0	0	0	0	0	0	0	0	0	0	0	0	0	0	0	0	0
Eukaryota						dropped	Zotu1262	0	0	0	0	0	0	3	30	1	0	0	0	15	0	2	9	0	5	0	0	10	0	0	0	2	0	5	1	0	0	0	0	0	0	0	0
Eukaryota						dropped	Zotu1276	0	0	0	0	0	0	0	0	0	0	0	0	0	0	0	0	5	0	0	0	4	0	0	0	39	0	19	0	2	5	0	0	0	0	0	0
Eukaryota						dropped	Zotu1300	0	0	0	0	0	0	0	0	0	0	0	0	19	3	0	1	3	14	0	0	14	0	0	0	7	2	16	1	6	2	0	0	0	0	0	0
Eukaryota						dropped	Zotu1379	0	0	0	0	0	0	0	0	0	0	0	0	7	1	0	1	0	0	0	0	0	0	0	9	24	0	21	3	30	9	0	2	0	0	0	0
Eukaryota						dropped	Zotu1473	0	0	0	0	0	0	0	0	0	0	0	0	0	8	3	0	0	29	0	0	0	0	0	0	35	2	17	6	0	3	0	0	0	0	0	0
Eukaryota						dropped	Zotu1539	0	0	0	0	0	0	0	0	0	0	0	0	57	0	1	1	2	4	0	0	0	4	0	0	7	1	2	0	0	0	0	0	0	0	0	0
Eukaryota						dropped	Zotu1581	0	0	0	0	0	0	0	0	0	0	0	0	2	0	9	0	0	0	0	0	0	0	0	0	11	0	22	2	2	4	0	0	0	0	0	0
Eukaryota						dropped	Zotu1630	0	0	0	0	0	0	0	1	0	0	0	1	8	2	0	0	2	2	12	0	31	0	0	1	25	2	25	2	17	2	0	0	0	0	0	4
Eukaryota						dropped	Zotu1675	1	0	0	0	0	0	0	0	0	0	0	1	1	0	0	0	0	1	0	0	55	0	0	0	5	0	6	1	0	2	0	0	0	0	0	0
Eukaryota						dropped	Zotu1689	1	0	0	0	1	0	0	1	0	0	0	5	6	0	0	1	0	2	0	0	23	0	0	1	14	0	21	5	4	2	0	0	0	0	0	0
Eukaryota						dropped	Zotu1698	0	0	0	0	0	0	0	0	0	0	0	0	0	0	0	0	0	0	0	15	21	0	0	0	5	0	0	0	0	0	0	0	0	0	0	0
Eukaryota						dropped	Zotu1826	11	0	3	4	0	0	0	3	0	0	5	5	2	3	0	0	0	3	0	0	0	0	0	4	2	0	2	0	0	0	0	0	0	0	0	0
Eukaryota						dropped	Zotu2204	3	0	0	0	0	0	14	4	2	0	0	0	4	0	0	0	1	0	0	0	0	0	0	0	0	0	0	0	0	1	0	0	0	0	0	0
Eukaryota						dropped	Zotu2283	5	0	0	2	0	0	3	2	3	5	1	1	7	2	0	0	0	0	0	0	4	0	0	3	3	0	2	0	0	0	0	0	0	0	0	0
Eukaryota						dropped	Zotu2309	0	0	0	0	0	0	0	0	0	0	0	0	1	3	0	0	0	0	0	0	4	0	0	0	5	0	4	0	1	3	0	0	0	0	0	0
Eukaryota						dropped	Zotu2393	1	0	0	0	0	0	12	11	1	3	3	20	11	1	0	0	3	0	0	0	7	2	0	0	10	0	8	0	1	0	1	0	0	0	0	0
Eukaryota						dropped	Zotu2504	5	0	5	3	0	0	9	1	4	3	10	3	3	0	0	0	0	0	0	0	4	0	0	0	0	0	1	1	1	0	0	0	0	0	0	2
Eukaryota						eukaryotic picoplankton environmental sample	Zotu354	0	0	0	0	0	0	399	27	12	25	54	95	0	0	0	0	0	0	0	0	0	0	0	0	8	1	49	6	0	0	0	1	2	10	0	4
Eukaryota						uncultured eukaryote	Zotu9	0	0	0	0	0	0	0	0	0	0	0	1	0	0	0	0	0	0	80441	0	1	0	0	0	135	0	0	0	0	1	0	0	0	0	0	0
Eukaryota						uncultured eukaryote	Zotu14	1036	54	421	177	30	344	30761	5945	8306	6166	19220	10527	8453	532	806	681	1471	1038	21	1	26	0	45	0	1430	83	2103	75	398	181	98	112	17	48	50	82
Eukaryota						uncultured eukaryote	Zotu16	0	0	0	0	0	0	0	0	0	0	0	0	0	0	0	0	2	0	0	0	0	0	0	33316	0	30	24768	9	0	0	0	0	0	0	0	0
Eukaryota						uncultured eukaryote	Zotu25	0	1	0	0	0	0	0	0	0	0	0	0	0	0	0	0	0	0	0	0	0	0	10925	21527	0	119	785	0	0	78	0	0	1	0	1	0
Eukaryota						uncultured eukaryote	Zotu31	0	0	0	0	0	0	0	0	0	0	0	0	0	0	0	0	0	0	0	0	16933	2788	0	0	0	0	0	46	0	0	0	0	0	0	0	0
Eukaryota						uncultured eukaryote	Zotu42	0	0	0	1	0	0	0	0	0	0	0	0	0	0	1	0	0	1	0	0	54	0	0	1	8	9	0	11593	2	2	0	0	0	0	0	0
Eukaryota						uncultured eukaryote	Zotu52	0	0	0	3	0	0	8	5	1	0	24	10	71	4	7	6	21	12	149	42	1742	7201	293	184	185	10	320	11	145	50	3	4	0	2	0	3
Eukaryota						uncultured eukaryote	Zotu99	0	0	0	0	0	0	0	0	0	0	0	0	0	0	0	0	0	333	0	0	0	0	0	9036	0	79	730	26	1	88	0	0	0	0	0	0
Eukaryota						uncultured eukaryote	Zotu153	284	0	130	83	4	0	609	198	35	120	280	368	345	124	99	60	208	238	0	0	95	0	0	3	287	0	441	28	14	54	44	19	4	26	2	16
Eukaryota						uncultured eukaryote	Zotu163	172	0	27	19	1	0	209	112	3	36	126	89	1015	83	53	73	85	391	0	0	0	0	0	0	454	0	158	12	12	37	92	16	2	5	1	7
Eukaryota						uncultured eukaryote	Zotu220	0	0	0	0	0	5	1	1	1	1	2	0	26	2	7	7	1	9	228	7	231	165	255	16	12	18	79	15	44	9	0	0	0	0	0	0
Eukaryota						uncultured eukaryote	Zotu329	75	0	47	30	6	0	69	82	2	40	96	114	67	21	14	3	33	14	0	0	5	0	0	0	0	0	2	2	0	0	0	0	0	0	0	0
Eukaryota						uncultured eukaryote	Zotu355	3	0	5	0	0	0	247	55	38	53	138	62	236	7	2	13	13	5	10	6	0	0	0	0	78	8	114	9	36	21	0	1	1	1	4	2
Eukaryota						uncultured eukaryote	Zotu370	0	0	3	0	0	57	2	4	7	3	9	8	12	0	2	6	2	3	87	1	66	147	122	5	5	1	25	1	10	5	0	0	0	0	0	0
Eukaryota						uncultured eukaryote	Zotu381	94	3	47	18	1	0	106	94	3	31	51	80	25	5	4	1	9	7	0	0	0	0	0	0	12	0	3	0	4	6	0	0	0	0	0	1
Eukaryota						uncultured eukaryote	Zotu387	0	0	0	0	0	0	0	0	0	0	0	0	0	0	0	0	0	44	0	0	0	0	0	408	1	83	41	12	0	36	0	0	0	0	0	0
Eukaryota						uncultured eukaryote	Zotu395	4	0	2	1	0	0	1	0	15	0	26	4	363	34	8	6	43	21	0	0	0	0	0	1	43	0	36	2	8	7	0	3	7	9	1	24
Eukaryota						uncultured eukaryote	Zotu407	7	0	1	1	1	0	131	51	3	2	59	59	12	5	0	0	0	1	0	0	37	0	0	0	40	0	8	0	3	0	0	0	0	0	0	0
Eukaryota						uncultured eukaryote	Zotu421	134	0	4	0	0	0	38	7	8	1	0	191	73	1	0	21	1	15	14	0	441	4	174	4	78	1	156	8	39	21	0	0	0	0	0	0
Eukaryota						uncultured eukaryote	Zotu440	1	0	0	0	0	0	620	25	4	9	72	159	0	0	0	0	0	0	0	0	7	10	0	0	3	0	3	0	1	0	0	0	0	0	0	0
Eukaryota						uncultured eukaryote	Zotu473	0	0	0	0	0	0	0	0	0	0	0	0	0	0	0	0	0	0	0	0	0	229	0	18	22	0	93	1	3	4	0	0	0	0	0	0
Eukaryota						uncultured eukaryote	Zotu532	0	0	0	0	0	0	0	0	0	0	0	0	0	0	0	0	0	0	0	0	0	252	25	78	26	0	11	0	0	0	0	0	0	0	0	0
Eukaryota						uncultured eukaryote	Zotu625	0	0	0	0	0	0	0	0	0	0	0	0	0	0	0	1	0	83	0	0	0	0	0	237	0	25	41	43	0	51	0	0	0	0	0	0
Eukaryota						uncultured eukaryote	Zotu713	0	0	0	0	0	164	0	0	0	0	0	0	2	0	0	0	0	0	0	0	0	0	0	0	0	0	0	0	0	0	0	0	0	0	0	0
Eukaryota						uncultured eukaryote	Zotu766	0	0	0	0	0	0	0	0	0	0	0	2	0	0	0	0	0	64	0	0	20	0	24	0	174	0	10	7	2	45	0	0	0	0	0	0
Eukaryota						uncultured eukaryote	Zotu776	18	0	12	4	0	0	26	5	22	10	32	56	1	2	0	2	2	0	0	0	0	0	0	0	0	0	1	0	0	0	0	0	0	0	0	0
Eukaryota						uncultured eukaryote	Zotu971	0	0	0	0	0	0	0	3	0	0	1	1	20	6	4	4	24	2	0	0	0	0	0	2	10	0	15	4	1	5	0	0	0	0	0	0
Eukaryota						uncultured eukaryote	Zotu1070	0	0	0	0	0	0	0	0	0	0	0	0	24	0	0	0	0	0	0	0	39	0	0	2	34	0	6	2	0	1	0	0	0	0	0	0
Eukaryota						uncultured eukaryote	Zotu1122	11	0	9	6	0	0	21	8	2	1	0	8	22	3	2	0	6	4	0	0	0	0	0	0	0	0	2	1	0	1	0	0	0	0	0	1
Eukaryota						uncultured eukaryote	Zotu1126	0	0	0	0	0	0	0	0	0	0	0	0	0	0	0	0	0	0	0	0	0	83	0	0	0	1	1	1	3	0	0	0	0	0	0	0
Eukaryota						uncultured eukaryote	Zotu1183	4	0	1	0	0	0	36	10	13	11	25	7	227	5	11	4	8	12	0	0	7	6	3	0	31	0	37	1	8	2	0	9	0	5	1	1
Eukaryota						uncultured eukaryote	Zotu1435	0	0	0	0	0	0	0	0	0	0	0	0	1	0	0	0	0	0	0	0	0	0	0	0	0	0	0	40	0	0	0	0	0	0	0	0
Eukaryota						uncultured eukaryote	Zotu1462	0	0	0	0	0	0	2	1	6	0	0	13	1	0	0	0	0	0	23	0	0	0	0	0	10	0	8	0	0	3	0	0	0	0	0	0
Eukaryota						uncultured eukaryote	Zotu1530	9	1	4	3	0	0	0	2	0	2	2	0	24	4	4	2	8	6	0	0	0	0	0	0	1	0	0	0	1	0	0	0	0	0	0	0
Eukaryota						uncultured eukaryote	Zotu1591	3	0	1	0	0	0	9	2	2	2	0	5	46	3	7	8	9	0	0	2	2	2	2	0	15	0	17	0	3	1	0	0	1	0	0	0
Eukaryota						uncultured eukaryote	Zotu1600	4	0	0	0	0	0	6	12	0	8	15	15	2	1	0	0	3	2	0	0	0	0	0	0	0	0	1	0	0	0	0	0	0	0	0	0
Eukaryota						uncultured eukaryote	Zotu1607	0	0	0	0	0	0	0	0	0	0	0	0	1	1	0	2	0	2	0	0	0	0	0	0	0	0	1	2	0	0	6	3	5	1	9	48
Eukaryota						uncultured eukaryote	Zotu1716	0	0	1	2	0	0	4	4	0	3	14	11	2	1	0	0	1	2	0	0	0	0	0	0	1	0	0	0	0	0	0	0	0	0	0	0
Eukaryota						uncultured eukaryote	Zotu1727	0	0	0	0	0	0	0	0	0	0	0	0	0	1	1	5	0	0	0	0	0	0	0	0	42	0	11	1	0	0	0	0	0	0	0	0
Eukaryota						uncultured eukaryote	Zotu1736	0	0	0	0	0	0	0	0	0	0	0	0	0	0	0	0	0	1	0	0	0	0	0	343	0	0	41	0	1	2	0	0	0	0	0	0
Eukaryota						uncultured eukaryote	Zotu1777	0	0	0	0	0	0	0	0	0	0	0	0	20	0	0	4	0	5	0	0	12	0	0	0	4	0	15	0	2	1	0	0	0	0	0	0
Eukaryota						uncultured eukaryote	Zotu1838	6	0	3	0	0	0	8	2	2	6	3	2	0	0	0	0	4	1	0	0	0	0	0	0	0	0	0	0	0	0	5	0	1	1	1	1
Eukaryota						uncultured eukaryote	Zotu2020	3	0	0	1	0	0	92	22	5	3	27	62	34	1	2	1	3	7	0	0	1	1	1	0	8	0	10	0	3	1	1	0	0	0	0	0
Eukaryota						uncultured eukaryote	Zotu2123	0	0	0	0	0	0	0	0	0	0	0	0	0	0	0	0	0	36	0	0	0	0	0	0	3	1	0	0	0	0	0	0	0	0	0	0
Eukaryota						uncultured eukaryote	Zotu2262	0	0	3	0	0	0	3	7	0	1	2	3	18	2	2	2	0	5	0	0	26	0	0	2	9	0	11	0	1	9	0	0	0	0	0	0
Eukaryota						uncultured eukaryote	Zotu2328	0	0	0	0	0	0	0	3	0	1	0	1	2	3	4	0	5	0	0	0	0	0	0	0	1	1	3	2	0	0	0	0	0	0	0	0
Eukaryota						uncultured eukaryote	Zotu2339	0	0	0	0	0	0	1	0	0	0	0	0	0	0	1	0	0	0	0	0	26	0	0	0	5	0	3	1	0	1	0	0	0	0	0	0
Eukaryota						uncultured eukaryote	Zotu2421	0	0	0	0	0	0	0	0	0	0	0	0	2	0	0	0	0	0	0	0	7	0	0	3	4	0	6	2	0	0	0	0	0	0	0	0
Eukaryota						uncultured eukaryote	Zotu2459	0	0	0	0	0	0	0	0	0	0	0	0	0	0	0	0	0	0	16	0	0	0	0	2	0	0	2	0	0	1	0	0	0	0	0	0
Eukaryota						uncultured eukaryote	Zotu2463	1	0	3	0	0	0	3	2	0	0	0	1	7	5	2	1	0	1	0	0	0	0	0	0	1	0	1	0	0	0	0	0	0	0	0	0
Eukaryota						uncultured eukaryote	Zotu2549	0	0	1	1	0	0	5	2	0	1	0	1	1	2	0	1	2	2	0	0	0	0	0	0	0	0	1	0	0	1	0	0	0	1	1	0
Eukaryota						uncultured eukaryote	Zotu2666	0	0	0	0	0	0	0	1	0	0	0	0	10	0	1	0	0	2	2	0	4	3	1	0	1	0	23	0	3	0	3	10	0	1	5	6
Eukaryota						uncultured marine eukaryote	Zotu297	3	0	0	2	0	0	518	38	0	1	3	26	5	1	0	0	0	0	0	0	0	0	0	0	66	0	79	1	113	5	7	3	0	25	3	33
Eukaryota						uncultured marine eukaryote	Zotu2095	0	0	0	0	0	0	0	0	0	0	0	0	0	0	0	1	12	0	0	0	0	0	0	0	4	0	1	4	0	13	0	0	0	0	0	0
Eukaryota						uncultured metazoan	Zotu68	0	0	0	0	0	0	0	0	0	0	0	0	0	0	0	0	0	0	0	131	4573	0	0	175	7	13	2125	14	3	65	0	0	0	0	0	0
Eukaryota						uncultured stramenopile	Zotu642	68	0	16	10	0	0	1	8	0	0	0	21	37	13	2	10	26	5	0	0	22	0	0	0	1	0	19	0	0	6	0	0	0	1	0	0

## Sheet: 18Suni_ZOTUS_CLEAN_GUT
S1 Appendix. 18Suni assay and ITS2 assay ZOTU assignment based on DNA isolated from seawater and oval butterflyfish (Chaetodon lunulatus) gut samples collected at 10 sites from Dongsha Atoll (Taiwan) in the South China Sea. The numbers in cells are the number of unique reads per ZOTU. BLANK4 refers to one of the extraction blanks that produced reads, indicated by the highlighted rows in yellow, w…
domain	phylum	class	order	family	genus	species	ZOTU	Clu1a	Clu2a	Clu3a	Clu4a	Clu5a	Clu6a	Clu7a	Clu8a	Clu9a	Clu10a	Clu11a	Clu12a	Clu13a	Clu14a	Clu15a	Clu16a	Clu17a	Clu18a	Clu19a	Clu20a	Clu21a	Clu23a	Clu24a	Clu25a	Clu26a	Clu27a	Clu28b	Clu29b	Clu30b	Clu32b	Clu33b	Clu34b	Clu35b	Clu36b	Clu37b	Clu38b	Clu39b	Clu40b
Eukaryota	Arthropoda	Hexanauplia	Cyclopoida	dropped	dropped	dropped	Zotu28	1	2	0	0	2	2	0	1	8	0	0	2	2	0	0	0	0	0	0	0	0	0	0	0	13	0	0	0	0	0	0	0	0	1	9	10	0	0
Eukaryota	Arthropoda	Hexanauplia	Cyclopoida	Xarifiidae	Xarifia	Xarifia sp. New Caledonia-RJH-2004	Zotu1662	0	0	0	0	5	0	0	0	6	2	0	0	1	0	0	1	0	0	0	0	0	3	0	0	0	0	0	0	0	0	0	0	0	0	51	3	0	0
Eukaryota	Arthropoda	Hexanauplia	Harpacticoida	Thalestridae	Parathalestris	Parathalestris verrucosa	Zotu646	0	0	0	0	0	0	1	0	0	0	0	0	0	0	0	0	0	0	0	0	0	0	0	0	0	0	0	0	0	0	0	0	0	0	0	0	0	0
Eukaryota	Bacillariophyta	Bacillariophyceae	Thalassiophysales	Catenulaceae	Amphora	Amphora coffeiformis	Zotu2479	0	0	0	0	0	0	0	0	1	0	0	0	0	0	0	0	0	0	0	0	0	0	0	0	0	0	0	0	0	0	0	0	0	0	0	0	0	0
Eukaryota	Ciliophora	Litostomatea	Pleurostomatida	Litonotidae	Litonotus	Litonotus paracygnus	Zotu362	0	0	0	0	0	0	0	0	0	0	0	0	0	0	0	0	0	0	0	0	0	0	0	0	0	0	688	0	0	0	0	0	0	0	0	0	0	0
Eukaryota	Cnidaria	Anthozoa	Scleractinia	Acroporidae	Acropora	Acropora aspera	Zotu2025	0	0	0	0	0	0	0	0	0	0	0	0	0	0	0	0	0	0	0	0	0	0	0	0	0	0	0	0	35	0	0	0	0	0	0	0	0	0
Eukaryota	Cnidaria	Anthozoa	Scleractinia	Acroporidae	Acropora	Acropora lutkeni	Zotu771	0	0	0	0	0	0	0	0	0	0	0	0	0	0	0	0	0	0	0	0	0	0	0	0	0	0	0	0	0	0	0	0	0	3	334	50	11	9
Eukaryota	Cnidaria	Anthozoa	Scleractinia	Acroporidae	Acropora	dropped	Zotu143	0	0	0	0	0	0	0	0	0	0	0	0	0	0	0	0	0	0	0	0	0	0	0	0	0	0	1173	214	0	0	0	0	886	123	0	17	0	7
Eukaryota	Cnidaria	Anthozoa	Scleractinia	Acroporidae	Acropora	dropped	Zotu449	11	0	0	0	0	0	0	0	0	0	0	0	0	0	0	0	0	0	0	0	0	0	0	0	0	0	2	231	5	0	0	0	335	0	0	0	0	0
Eukaryota	Cnidaria	Anthozoa	Scleractinia	Acroporidae	Acropora	dropped	Zotu553	0	0	0	0	0	1	0	0	0	0	0	0	0	0	0	0	0	0	0	0	0	0	0	0	0	0	214	54	0	0	0	0	139	22	0	1	0	0
Eukaryota	Cnidaria	Anthozoa	Scleractinia	Acroporidae	Acropora	dropped	Zotu554	0	0	0	0	0	346	0	0	0	0	0	0	0	0	0	0	0	0	0	0	0	0	0	0	0	0	0	159	0	8	0	0	201	41	0	0	0	0
Eukaryota	Cnidaria	Anthozoa	Scleractinia	Acroporidae	Acropora	dropped	Zotu592	5	0	0	0	0	0	0	0	0	0	0	0	0	0	0	0	0	0	0	0	0	0	0	0	0	0	0	168	36	0	0	1	335	3	0	0	0	0
Eukaryota	Cnidaria	Anthozoa	Scleractinia	Acroporidae	Acropora	dropped	Zotu1159	0	0	0	0	0	101	0	0	0	1	0	0	1	0	0	0	0	0	0	0	0	0	0	0	0	0	0	32	0	0	0	0	21	0	0	0	0	0
Eukaryota	Cnidaria	Anthozoa	Scleractinia	Acroporidae	Acropora	dropped	Zotu1481	2	0	0	0	0	2	0	0	0	0	0	0	0	0	0	0	0	0	0	0	0	0	0	0	0	0	1	4	0	0	0	0	75	0	0	0	0	0
Eukaryota	Cnidaria	Anthozoa	Scleractinia	Acroporidae	Acropora	dropped	Zotu1559	0	0	0	0	0	0	0	0	0	0	0	0	0	0	0	0	0	2	0	0	0	0	0	0	0	0	0	0	0	0	0	0	0	0	0	12	0	22
Eukaryota	Cnidaria	Anthozoa	Scleractinia	Acroporidae	Acropora	dropped	Zotu1774	1	0	0	0	0	0	0	0	2	0	0	0	0	0	0	0	0	0	0	0	0	0	0	0	0	0	0	25	0	0	0	0	15	0	0	0	0	0
Eukaryota	Cnidaria	Anthozoa	Scleractinia	Acroporidae	Acropora	dropped	Zotu2263	4	0	0	0	0	0	0	0	0	0	0	0	0	0	0	0	0	0	0	0	0	0	0	0	0	0	0	34	10	0	0	0	42	0	0	0	0	0
Eukaryota	Cnidaria	Anthozoa	Scleractinia	Agariciidae	dropped	dropped	Zotu13	265	9	79	0	3157	1169	2163	6140	6872	18521	45	1609	6	2427	674	0	2	3712	1649	5	0	109	1573	2654	0	252	5	2	1386	676	3833	77	1319	1429	1705	11636	12609	11129
Eukaryota	Cnidaria	Anthozoa	Scleractinia	dropped	dropped	dropped	Zotu1	229537	15840	18569	383	7995	7644	40460	10807	25193	117699	14238	22276	12914	24964	73256	26878	20713	28132	18556	19545	111380	39745	142981	120437	178207	172113	149167	42530	95831	120286	15879	114736	19527	143255	53378	30334	8569	4566
Eukaryota	Cnidaria	Anthozoa	Scleractinia	dropped	dropped	dropped	Zotu3	21538	7445	18739	113	12650	17182	61036	3139	25703	20440	2938	1174	8655	1582	1393	38	90	1968	28	465	530	1273	18034	11798	5515	462	1908	15140	5284	376	3	51	388	650	21265	718	62	656
Eukaryota	Cnidaria	Anthozoa	Scleractinia	Pocilloporidae	dropped	dropped	Zotu32	0	0	0	0	0	0	0	3	13	0	16	0	1	0	0	3	37	11	12	0	0	8	0	0	0	0	0	0	3	3	0	1	3	43	7384	3113	13179	1313
Eukaryota	Cnidaria	Hydrozoa	Anthoathecata	dropped	dropped	dropped	Zotu2680	0	0	0	0	0	0	0	0	0	0	0	0	0	0	0	0	0	0	0	0	0	0	0	0	1	0	0	0	0	0	0	0	0	0	0	0	0	0
Eukaryota	dropped	dropped	dropped	dropped	dropped	dropped	Zotu58	2	0	0	0	0	0	0	0	0	0	0	0	0	0	0	0	0	0	0	0	0	0	0	0	0	0	0	0	0	0	0	0	0	0	0	0	0	0
Eukaryota	dropped	dropped	dropped	dropped	dropped	dropped	Zotu689	0	0	0	0	0	0	0	0	0	0	0	0	0	0	0	0	1	0	0	0	0	0	0	0	1215	0	0	0	0	0	1	0	0	0	2	0	0	0
Eukaryota	dropped	dropped	dropped	dropped	dropped	dropped	Zotu2130	0	0	0	0	0	0	0	0	0	0	0	0	0	0	13	0	0	0	0	0	0	0	0	0	0	0	0	0	0	0	0	0	0	0	0	0	0	0
Eukaryota	Porifera	Demospongiae	Clionaida	dropped	dropped	dropped	Zotu548	0	0	0	0	0	0	1	0	0	0	0	0	0	0	0	0	0	0	0	0	0	0	0	0	0	0	0	0	0	0	0	0	0	0	0	0	0	0
Eukaryota		Dinophyceae	Suessiales	Symbiodiniaceae	Cladocopium	Cladocopium sp. clade C	Zotu1511	0	0	0	0	0	0	0	0	0	0	0	0	0	0	3	0	0	0	0	0	0	0	0	0	2	0	0	0	0	0	1	0	0	0	101	16	5	12
Eukaryota		Dinophyceae	Suessiales	Symbiodiniaceae	dropped	dropped	Zotu84	962	120	43	20	23	10	72	5	9	90	6	14	17	425	5621	49	24	24	19	8	648	255	653	163	2460	2226	8649	8	443	548	1232	48	72	427	7546	829	638	359
Eukaryota		Dinophyceae	Suessiales	Symbiodiniaceae	Symbiodinium	dropped	Zotu677	9	5	0	2	1	0	1	1	3	4	0	0	4	1	0	0	0	0	1	0	0	0	32	0	1	0	60	18	17	6	137	0	0	0	85	4	0	5
Eukaryota		Dinophyceae	Suessiales	Symbiodiniaceae	Symbiodinium	dropped	Zotu696	1	1	0	0	0	0	0	0	2	4	0	1	0	0	0	0	0	0	0	0	0	0	0	0	0	0	2	1	0	1	199	5	0	0	23	0	0	0
Eukaryota		Dinophyceae	Suessiales	Symbiodiniaceae	Symbiodinium	dropped	Zotu822	1	1	0	0	0	0	0	0	0	1	0	1	2	0	0	0	1	0	1	0	0	0	0	0	0	0	0	0	0	2	160	0	0	0	15	0	0	0
Eukaryota		Dinophyceae	Suessiales	Symbiodiniaceae	Symbiodinium	dropped	Zotu916	0	0	0	0	0	0	0	0	0	0	0	0	0	0	0	0	0	1	1	0	0	1	0	0	2	0	202	0	5	0	0	0	0	0	0	0	20	2
Eukaryota		Dinophyceae	Suessiales	Symbiodiniaceae	Symbiodinium	dropped	Zotu1066	1	0	0	0	1	0	0	0	0	0	0	1	2	0	0	0	0	0	0	0	0	0	0	0	0	0	74	0	0	1	13	0	2	0	2	0	0	0
Eukaryota		Dinophyceae	Suessiales	Symbiodiniaceae	Symbiodinium	dropped	Zotu1578	2	0	0	0	1	0	0	1	2	3	0	2	0	0	0	0	0	0	0	0	0	0	0	0	0	0	0	0	6	0	0	0	0	0	0	0	0	0
Eukaryota		Dinophyceae	Suessiales	Symbiodiniaceae	Symbiodinium	dropped	Zotu1756	0	0	0	0	0	0	0	0	0	0	0	0	0	0	4	0	0	0	0	0	0	0	0	0	0	0	0	0	0	0	0	0	0	0	0	0	0	2
Eukaryota		Dinophyceae	Suessiales	Symbiodiniaceae	Symbiodinium	dropped	Zotu2073	0	0	0	0	0	0	0	0	0	0	0	0	0	0	0	0	0	0	0	0	0	0	0	0	0	0	0	0	0	0	1	0	0	0	0	0	0	0
Eukaryota		Dinophyceae	Suessiales	Symbiodiniaceae	Symbiodinium	dropped	Zotu2131	1	0	0	0	1	1	0	0	0	0	0	0	0	0	0	0	0	0	0	0	0	0	0	5	0	0	0	0	0	0	0	0	0	0	47	15	0	0
Eukaryota		Dinophyceae	Suessiales	Symbiodiniaceae	Symbiodinium	Symbiodinium sp. clade E	Zotu1978	0	1	0	0	0	0	1	0	0	0	0	0	1	0	0	0	0	0	1	0	0	0	0	0	0	0	0	0	0	0	28	1	0	0	0	0	0	0
Eukaryota						dropped	Zotu1215	0	0	0	0	0	0	0	0	0	0	0	0	0	0	0	0	0	0	0	0	0	0	0	0	0	0	0	0	0	1	81	4	0	0	0	0	0	0
Eukaryota						uncultured eukaryote	Zotu163	0	0	0	0	0	0	1	0	2	0	0	0	1	0	0	0	0	0	0	0	0	0	0	0	0	0	0	0	0	0	0	0	0	0	0	0	0	0

## Sheet: ITS2_ZOTUS
S1 Appendix. 18Suni assay and ITS2 assay ZOTU assignment based on DNA isolated from seawater and oval butterflyfish (Chaetodon lunulatus) gut samples collected at 10 sites from Dongsha Atoll (Taiwan) in the South China Sea. The numbers in cells are the number of unique reads per ZOTU. BLANK4 refers to one of the extraction blanks that produced reads, indicated by the highlighted rows in yellow, w…
domain	phylum	class	order	family	genus	species	ZOTU	numberOfUnq_BlastHits	BLANK4	Clu1a	Clu2a	Clu3a	Clu4a	Clu5a	Clu6a	Clu7a	Clu8a	Clu9a	Clu10a	Clu11a	Clu12a	Clu13a	Clu14a	Clu15a	Clu16a	Clu17a	Clu18a	Clu19a	Clu20a	Clu21a	Clu22a	Clu23a	Clu24a	Clu25a	Clu26a	Clu27a	Clu28b	Clu29b	Clu30b	Clu32b	Clu33b	Clu34b	Clu35b	Clu36b	Clu37b	Clu38b	Clu39b	Clu40b	DGX1
Eukaryota	Acanthocephala	Palaeacanthocephala		Transvenidae	Pararhadinorhynchus	Pararhadinorhynchus sp. JYW-2010	Zotu26	1	0	0	0	0	0	0	0	0	0	0	0	0	0	0	0	0	0	0	0	0	0	0	0	0	0	0	0	0	0	0	0	0	0	0	0	0	0	0	0	0	0
Eukaryota	Arthropoda	Hexanauplia	Poecilostomatoida	Oncaeidae	Oncaea	Oncaea venusta	Zotu1184	1	0	0	0	0	0	0	0	0	0	0	0	0	0	0	0	0	0	0	0	0	0	0	0	0	0	0	0	0	0	0	0	0	0	0	0	0	0	0	0	0	0
Eukaryota	Ascomycota	Dothideomycetes	Pleosporales	Pleosporaceae		uncultured Cochliobolus	Zotu1382	1	0	0	0	0	0	0	0	0	0	0	0	0	0	0	0	0	0	0	0	0	0	0	0	0	0	0	0	0	0	0	0	0	0	0	0	0	0	0	0	0	0
Eukaryota	Ascomycota	Sordariomycetes	Hypocreales	Hypocreaceae		uncultured Trichoderma	Zotu306	1	0	0	0	0	0	0	0	0	0	0	0	0	0	0	0	0	0	0	0	0	0	0	0	0	0	0	0	0	0	0	0	0	0	0	0	0	0	0	0	0	207
Eukaryota	Ascomycota	Sordariomycetes	Hypocreales	Hypocreaceae		uncultured Trichoderma	Zotu463	1	0	0	0	0	0	0	0	0	0	0	0	0	0	0	0	0	0	0	0	0	0	0	0	0	0	0	0	0	0	0	0	0	0	0	0	0	0	0	0	0	0
Eukaryota	Ascomycota					uncultured Ascomycota	Zotu902	1	0	0	0	0	0	0	0	0	0	0	0	0	0	0	0	0	0	0	0	0	0	0	0	0	0	0	0	0	0	0	0	0	0	0	0	0	0	0	0	0	0
Eukaryota	Ascomycota					uncultured Ascomycota	Zotu1627	1	0	0	0	0	0	0	0	0	0	0	0	0	0	0	0	0	0	0	0	0	0	0	0	0	0	0	0	0	0	0	0	0	0	0	0	0	0	0	0	0	0
Eukaryota	Ascomycota					uncultured Ascomycota	Zotu1834	1	0	0	0	0	0	0	0	0	0	0	0	0	0	0	0	0	0	0	0	0	0	0	0	0	0	0	0	0	0	0	0	0	0	0	0	0	0	0	0	0	0
Eukaryota	Basidiomycota	Agaricomycetes	Polyporales	Polyporaceae		uncultured Lenzites	Zotu192	1	0	0	0	0	0	0	0	0	0	0	0	0	0	0	0	0	0	0	0	0	0	0	0	0	0	0	0	0	0	0	0	0	0	0	0	0	0	0	0	0	0
Eukaryota	Basidiomycota					uncultured Basidiomycota	Zotu419	1	0	0	0	0	0	0	0	0	0	0	0	0	0	0	0	0	0	0	0	0	0	0	0	0	0	0	0	0	0	0	0	0	0	0	0	0	0	0	0	0	1
Eukaryota	Basidiomycota					uncultured Basidiomycota	Zotu937	1	0	0	0	0	0	0	0	0	0	0	0	0	0	0	0	0	0	0	0	0	0	0	0	0	0	0	0	0	0	0	0	0	0	0	0	0	0	0	0	0	86
Eukaryota	Chlorophyta	Mamiellophyceae	Mamiellales	Bathycoccaceae	Ostreococcus	dropped	Zotu1232	3	0	0	0	0	0	0	0	0	0	0	0	0	0	0	0	0	0	0	0	0	0	0	0	0	0	0	0	0	0	0	0	0	0	0	0	0	0	0	0	0	1
Eukaryota	Chlorophyta	Mamiellophyceae	Mamiellales	dropped	dropped	dropped	Zotu1460	5	0	0	0	0	0	0	0	0	0	0	0	0	0	0	0	0	0	0	0	0	0	0	0	0	0	0	0	0	0	0	0	0	0	0	0	0	0	0	0	0	0
Eukaryota	Ciliophora	Oligohymenophorea	Sessilida	Vorticellidae	Vorticella	Vorticella sp. 23 PS-2013	Zotu832	1	0	0	0	0	0	0	0	0	0	0	0	0	0	0	0	0	0	0	0	0	0	0	0	0	0	0	0	0	0	0	0	0	0	0	0	0	0	0	0	0	0
Eukaryota	Ciliophora	Spirotrichea	Tintinnida	Codonellopsidae	Laackmanniella	Laackmanniella prolongata	Zotu1062	1	0	0	0	0	0	0	0	0	0	0	0	0	0	0	0	0	0	0	0	0	0	0	0	0	0	0	0	0	0	0	0	0	0	0	0	0	0	0	0	0	1
Eukaryota	Cnidaria	Anthozoa	Alcyonacea	Alcyoniidae	Sarcophyton	Sarcophyton auritum	Zotu1004	1	0	0	0	0	0	0	0	0	0	0	0	0	0	0	0	0	0	0	0	0	0	0	0	0	0	0	0	0	0	0	0	0	0	0	0	0	0	0	0	0	0
Eukaryota	Cnidaria	Anthozoa	Alcyonacea	Alcyoniidae	Sinularia	Sinularia polydactyla	Zotu257	1	0	0	0	0	0	0	0	0	0	0	0	0	0	0	0	0	0	0	0	0	0	0	0	0	0	0	0	0	0	0	0	0	0	0	0	0	0	0	0	0	0
Eukaryota	Cnidaria	Anthozoa	Alcyonacea	Clavulariidae	Pachyclavularia	Pachyclavularia sp. I001	Zotu11	1	0	0	0	0	0	0	0	0	0	0	0	0	0	0	0	0	0	0	0	0	0	0	0	0	0	0	0	0	0	0	0	0	0	0	0	0	0	0	0	0	0
Eukaryota	Cnidaria	Anthozoa	Helioporacea	Helioporidae	Heliopora	Heliopora sp. 1 NGW-2018	Zotu394	1	0	0	0	0	0	0	0	0	0	0	0	0	0	0	0	0	0	0	0	0	0	0	0	0	0	0	0	0	0	0	0	0	0	0	0	0	0	0	0	0	0
Eukaryota	Cnidaria	Anthozoa	Helioporacea	Lithotelestidae	Nanipora	dropped	Zotu125	2	0	0	0	0	0	0	0	0	0	0	0	0	0	0	0	0	0	0	0	0	0	0	0	0	0	0	0	0	0	0	0	0	0	0	0	0	0	0	0	0	0
Eukaryota	Cnidaria	Anthozoa	Scleractinia	Acroporidae	Montipora	dropped	Zotu49	8	4	9	429	5	3	1	0	0	0	3	14	11	58	0	110	0	19	64	18	15	11	0	0	0	0	0	2	0	0	0	3	0	0	0	3	0	22	0	0	0	1352
Eukaryota	Cnidaria	Anthozoa	Scleractinia	Acroporidae	Montipora	dropped	Zotu53	2	0	1	2482	3	0	0	0	0	0	0	0	0	3	0	26	11	3	26	8	0	0	0	0	0	0	0	0	0	0	0	0	0	0	0	0	1	2	4	1	0	908
Eukaryota	Cnidaria	Anthozoa	Scleractinia	Acroporidae	Montipora	dropped	Zotu100	2	0	0	3	0	0	0	0	0	0	0	0	0	0	0	1	0	0	0	0	0	0	0	0	0	0	0	0	0	0	0	0	0	0	0	0	0	0	0	0	0	0
Eukaryota	Cnidaria	Anthozoa	Scleractinia	Acroporidae	Montipora	dropped	Zotu131	5	3	12	112	24	0	1	0	5	1	3	6	8	13	1	40	0	8	35	3	2	5	0	0	0	0	0	1	0	0	0	11	0	0	0	0	3	9	0	0	0	216
Eukaryota	Cnidaria	Anthozoa	Scleractinia	Acroporidae	Montipora	dropped	Zotu153	2	0	0	14	1	0	0	0	0	0	0	0	0	0	0	0	0	0	1	0	0	0	0	0	0	0	0	0	0	0	0	0	0	0	0	0	0	0	0	0	0	122
Eukaryota	Cnidaria	Anthozoa	Scleractinia	Acroporidae	Montipora	dropped	Zotu177	2	10	0	36	0	0	0	0	0	0	0	0	0	0	0	0	0	0	0	0	0	0	0	0	0	0	0	0	0	0	0	0	0	0	0	9	0	0	0	0	0	12
Eukaryota	Cnidaria	Anthozoa	Scleractinia	Acroporidae	Montipora	dropped	Zotu223	7	0	0	44	6	0	0	0	0	0	0	0	0	0	0	0	0	1	1	0	0	0	0	0	0	0	0	0	0	0	0	0	0	0	0	0	0	0	0	0	0	640
Eukaryota	Cnidaria	Anthozoa	Scleractinia	Acroporidae	Montipora	dropped	Zotu227	2	0	0	3	0	0	0	0	0	0	0	0	0	0	0	0	0	0	2	0	0	0	0	0	0	0	0	0	0	0	0	0	0	0	0	0	0	0	0	0	0	56
Eukaryota	Cnidaria	Anthozoa	Scleractinia	Acroporidae	Montipora	dropped	Zotu240	5	0	0	205	0	0	0	0	0	0	0	3	0	13	0	47	0	2	12	1	0	0	0	0	0	0	0	0	0	0	0	0	0	0	0	0	60	12	1	0	0	288
Eukaryota	Cnidaria	Anthozoa	Scleractinia	Acroporidae	Montipora	dropped	Zotu262	2	0	2	189	0	0	0	0	0	0	0	0	0	13	0	103	68	3	10	22	8	0	0	0	0	0	0	0	0	0	0	0	0	0	0	0	0	3	5	0	0	277
Eukaryota	Cnidaria	Anthozoa	Scleractinia	Acroporidae	Montipora	dropped	Zotu443	2	0	2	12	0	0	0	0	0	0	0	0	0	0	0	0	0	0	1	0	0	0	0	0	0	0	0	0	0	0	0	0	0	0	0	0	0	0	0	0	0	0
Eukaryota	Cnidaria	Anthozoa	Scleractinia	Acroporidae	Montipora	dropped	Zotu501	2	0	0	57	0	0	0	0	0	0	0	0	0	0	0	28	137	0	6	2	0	0	0	0	0	0	0	0	0	0	0	0	0	0	0	0	0	0	5	9	1	0
Eukaryota	Cnidaria	Anthozoa	Scleractinia	Acroporidae	Montipora	dropped	Zotu607	3	0	1	6	0	0	1	0	0	0	0	0	0	1	0	10	0	0	1	1	1	0	0	0	0	0	0	0	0	0	0	0	0	0	0	0	0	33	0	0	1	235
Eukaryota	Cnidaria	Anthozoa	Scleractinia	Acroporidae	Montipora	dropped	Zotu668	2	0	1	115	0	0	0	0	0	0	0	0	0	3	0	24	30	0	2	2	0	0	0	0	0	0	0	0	0	0	0	0	0	0	0	0	0	0	0	0	0	65
Eukaryota	Cnidaria	Anthozoa	Scleractinia	Acroporidae	Montipora	dropped	Zotu780	3	0	0	68	0	0	0	0	0	0	0	0	0	0	0	20	10	1	7	0	1	0	0	0	0	0	0	0	0	0	0	0	0	0	0	0	0	0	7	0	1	125
Eukaryota	Cnidaria	Anthozoa	Scleractinia	Acroporidae	Montipora	dropped	Zotu1149	2	0	0	0	0	0	0	0	0	0	0	0	0	0	0	0	0	0	0	0	0	0	0	0	0	0	0	0	0	0	0	0	0	0	0	0	0	0	7	37	0	0
Eukaryota	Cnidaria	Anthozoa	Scleractinia	Acroporidae	Montipora	dropped	Zotu1251	3	0	1	4	0	0	0	0	0	0	0	0	0	0	0	12	18	0	0	0	0	0	0	0	0	0	0	0	0	0	0	0	0	0	0	0	0	0	0	0	0	1
Eukaryota	Cnidaria	Anthozoa	Scleractinia	Acroporidae	Montipora	dropped	Zotu1328	2	0	1	10	3	0	0	0	0	0	0	0	0	1	0	14	0	0	3	0	0	0	0	0	0	0	0	0	0	0	0	4	0	0	0	0	0	6	0	0	0	9
Eukaryota	Cnidaria	Anthozoa	Scleractinia	Acroporidae	Montipora	dropped	Zotu1589	3	0	0	17	0	0	0	0	0	0	0	0	0	0	0	2	1	0	1	0	0	0	0	0	0	0	0	0	0	0	0	0	0	0	0	0	0	1	0	0	0	0
Eukaryota	Cnidaria	Anthozoa	Scleractinia	Acroporidae	Montipora	dropped	Zotu1642	2	0	0	0	0	0	0	0	0	0	0	3	0	0	0	0	0	0	0	0	0	0	0	0	0	0	0	0	0	0	0	0	16	0	0	0	0	0	0	0	0	0
Eukaryota	Cnidaria	Anthozoa	Scleractinia	Acroporidae	Montipora	Montipora digitata	Zotu390	2	4	0	9	0	0	0	0	0	0	0	0	0	0	0	0	0	0	0	0	0	0	0	0	0	0	0	0	0	0	0	0	0	0	0	0	0	0	0	0	0	4
Eukaryota	Cnidaria	Anthozoa	Scleractinia	Acroporidae	Montipora	Montipora dilatata	Zotu201	1	0	3	480	1	0	0	0	2	0	0	14	0	2	0	39	17	3	34	5	0	0	0	0	0	0	0	0	0	0	0	0	0	0	0	0	0	5	9	1	0	82
Eukaryota	Cnidaria	Anthozoa	Scleractinia	Acroporidae	Montipora	Montipora dilatata	Zotu376	1	0	1	3	0	0	0	0	0	0	0	0	0	0	0	2	0	0	0	0	0	0	0	0	0	0	0	0	0	0	0	0	0	0	0	0	0	0	0	0	0	12
Eukaryota	Cnidaria	Anthozoa	Scleractinia	Acroporidae	Montipora	Montipora dilatata	Zotu662	1	0	1	116	0	0	0	0	0	0	0	0	0	0	0	2	0	0	0	0	0	0	0	0	0	0	0	0	0	0	0	0	0	0	0	0	0	1	0	0	0	1
Eukaryota	Cnidaria	Anthozoa	Scleractinia	Acroporidae	Montipora	Montipora flabellata	Zotu674	2	0	0	31	0	0	0	0	0	0	0	0	0	1	0	31	95	0	21	0	0	0	0	0	0	0	0	0	0	0	0	0	0	0	0	0	0	1	0	0	1	7
Eukaryota	Cnidaria	Anthozoa	Scleractinia	Acroporidae	Montipora	Montipora flabellata	Zotu1162	2	1	0	33	0	0	0	0	0	0	0	0	0	0	0	7	1	0	2	0	0	0	0	0	0	0	0	0	0	0	0	0	0	0	0	0	0	0	0	0	0	0
Eukaryota	Cnidaria	Anthozoa	Scleractinia	Acroporidae	Montipora	Montipora fragilis	Zotu361	1	0	0	11	2	0	0	0	0	0	0	0	0	0	0	2	0	0	9	0	0	0	0	0	0	0	0	0	0	0	0	0	0	0	0	0	0	1	0	0	0	289
Eukaryota	Cnidaria	Anthozoa	Scleractinia	Acroporidae	Montipora	Montipora fragilis	Zotu411	1	0	0	0	0	0	0	0	0	0	0	0	0	0	0	0	0	0	0	0	0	0	0	0	0	0	0	0	0	0	0	0	0	0	0	0	0	0	0	0	0	0
Eukaryota	Cnidaria	Anthozoa	Scleractinia	Acroporidae	Montipora	Montipora gaimardi	Zotu21	1	0	1	2	0	0	0	0	0	0	0	0	0	0	0	69	0	0	4	4	0	0	0	0	0	0	0	0	0	0	0	36	0	0	0	13	0	63	0	0	0	0
Eukaryota	Cnidaria	Anthozoa	Scleractinia	Acroporidae	Montipora	Montipora gaimardi	Zotu917	1	0	0	0	0	0	0	0	0	0	0	0	0	0	0	0	0	1	4	0	0	0	0	0	0	0	0	0	0	0	0	0	0	0	0	102	0	0	0	0	0	0
Eukaryota	Cnidaria	Anthozoa	Scleractinia	Acroporidae	Montipora	Montipora mollis	Zotu1903	1	0	0	32	0	0	0	0	0	0	0	2	0	0	0	6	28	5	5	1	4	0	0	0	0	0	0	0	0	0	0	0	0	0	0	0	0	0	0	0	0	5
Eukaryota	Cnidaria	Anthozoa	Scleractinia	Acroporidae	Montipora	Montipora sp. DM19	Zotu315	1	0	1	71	7	0	0	0	0	0	0	3	0	2	0	5	0	2	6	1	0	1	0	0	0	0	0	0	0	0	0	1	0	0	0	0	0	1	0	0	0	161
Eukaryota	Cnidaria	Anthozoa	Scleractinia	Acroporidae	Montipora	Montipora truncata	Zotu189	1	0	0	389	0	0	0	0	0	0	0	0	0	0	0	1	0	0	3	0	0	0	0	0	0	0	0	0	0	0	0	0	0	0	0	0	0	1	1	1	0	109
Eukaryota	Cnidaria	Anthozoa	Scleractinia	Acroporidae	Montipora	Montipora truncata	Zotu253	1	0	9	183	0	0	0	0	0	1	0	1	0	0	0	11	0	2	0	1	0	0	0	0	0	0	0	0	0	0	0	0	0	0	0	0	0	0	1	0	0	5
Eukaryota	Cnidaria	Anthozoa	Scleractinia	Acroporidae	Montipora	Montipora truncata	Zotu337	1	0	0	258	0	0	0	0	0	0	0	0	0	2	0	9	0	1	8	2	0	0	0	0	0	0	0	0	0	0	0	0	0	0	0	0	0	0	0	0	0	251
Eukaryota	Cnidaria	Anthozoa	Scleractinia	Acroporidae	Montipora	Montipora truncata	Zotu373	1	0	1	57	0	0	0	0	0	0	0	0	0	0	0	1	7	0	0	0	0	0	0	0	0	0	0	0	0	0	0	0	0	0	0	0	0	0	0	1	0	15
Eukaryota	Cnidaria	Anthozoa	Scleractinia	Acroporidae	Montipora	Montipora truncata	Zotu403	1	0	6	138	0	0	0	0	0	0	0	0	0	0	0	8	3	0	24	2	0	0	0	0	0	0	0	0	0	0	0	0	0	0	0	0	0	0	0	0	0	173
Eukaryota	Cnidaria	Anthozoa	Scleractinia	Acroporidae	Montipora	Montipora truncata	Zotu472	1	0	0	265	0	0	0	0	0	0	0	0	0	0	0	8	4	1	0	0	0	0	0	0	0	0	0	0	0	0	0	0	0	0	0	0	0	4	1	0	0	249
Eukaryota	Cnidaria	Anthozoa	Scleractinia	Acroporidae	Montipora	Montipora truncata	Zotu783	1	0	0	82	0	0	0	0	0	0	0	2	0	0	0	37	30	0	2	2	0	0	0	0	0	0	0	0	0	0	0	0	0	0	0	0	0	9	4	0	1	48
Eukaryota	Cnidaria	Anthozoa	Scleractinia	Acroporidae	Montipora	Montipora venosa	Zotu341	1	0	0	10	0	0	0	0	0	0	0	2	0	0	0	4	27	0	0	0	0	0	0	0	0	0	0	0	0	0	0	0	0	0	0	0	0	0	1	0	0	3
Eukaryota	Cnidaria	Anthozoa	Scleractinia	Agariciidae	Pavona	Pavona cactus	Zotu498	1	0	0	0	1	375	0	12	0	0	3	0	1	0	0	0	0	0	0	0	1	0	0	0	0	0	0	0	0	0	0	0	0	0	0	0	0	0	0	0	0	0
Eukaryota	Cnidaria	Anthozoa	Scleractinia	Dendrophylliidae	Turbinaria	Turbinaria mesenterina	Zotu432	1	0	15	7	0	7	3	28	0	0	17	8	10	6	195	0	0	0	0	0	0	0	0	0	0	0	0	349	0	0	0	0	0	0	0	0	0	0	0	0	0	0
Eukaryota	Cnidaria	Anthozoa	Scleractinia	dropped	dropped	dropped	Zotu61	4	0	0	0	8	49	0	0	0	0	0	0	2	1	8	394	13757	0	0	0	0	0	0	0	0	0	0	2	0	0	0	34	0	0	1	6	0	0	0	0	0	0
Eukaryota	Cnidaria	Anthozoa	Scleractinia	Fungiidae	dropped	dropped	Zotu54	2	0	1	0	540	0	0	188	2851	223	557	7008	499	893	1590	0	0	1	0	1029	0	44	0	3	1278	5911	1497	235	3	0	0	0	0	0	0	0	18	0	0	0	0	0
Eukaryota	Cnidaria	Anthozoa	Scleractinia	Fungiidae	Lithophyllon	Lithophyllon scabra	Zotu13	1	0	29910	18007	11608	1174	4474	4306	5244	2629	1431	671	1798	29	149	1	0	0	0	2444	14	16	0	0	442	162	210	66	1	5	0	7	0	0	0	30	0	2	0	0	0	0
Eukaryota	Cnidaria	Anthozoa	Scleractinia	Fungiidae	Lithophyllon	Lithophyllon scabra	Zotu30	1	0	5486	15090	2942	249	399	52	79	756	217	55	130	0	14	2	0	0	0	390	0	0	0	0	4	20	1	1	0	21	33	0	0	0	0	11	0	0	0	0	0	0
Eukaryota	Cnidaria	Anthozoa	Scleractinia	Fungiidae	Lithophyllon	Lithophyllon scabra	Zotu158	1	0	763	21	2593	0	114	6	15	306	108	22	157	0	0	0	0	0	0	61	1	1	0	0	0	1	8	3	0	2	3	0	0	0	0	0	0	0	0	0	0	0
Eukaryota	Cnidaria	Anthozoa	Scleractinia	Fungiidae	Lithophyllon	Lithophyllon scabra	Zotu344	1	0	513	136	298	7	176	329	151	68	32	346	43	1	4	1	0	0	0	124	0	5	0	0	77	40	9	0	0	0	0	0	0	0	0	1	0	0	0	0	0	0
Eukaryota	Cnidaria	Anthozoa	Scleractinia	Fungiidae		Fungiidae sp. YO-2019	Zotu58	1	0	3	0	10	1	2	34	545	531	26	8309	180	135	303	0	0	11	0	356	0	467	0	19	124	3822	104	58	0	0	0	0	0	0	0	0	1	0	0	0	0	0
Eukaryota	Cnidaria	Anthozoa	Scleractinia	Fungiidae		Fungiidae sp. YO-2019	Zotu94	1	0	0	0	0	0	0	1	125	27	2	2783	10	115	39	0	0	1	0	48	0	10	0	4	316	1666	32	20	0	0	0	0	0	0	0	0	0	0	0	0	0	0
Eukaryota	Cnidaria	Anthozoa	Scleractinia	Fungiidae		Fungiidae sp. YO-2019	Zotu106	1	0	0	0	247	0	2	16	80	44	18	3740	60	32	130	1	0	0	0	185	0	23	0	0	14	1837	30	7	0	0	0	0	0	0	0	0	2	0	0	0	0	0
Eukaryota	Cnidaria	Anthozoa	Scleractinia	Fungiidae		Fungiidae sp. YO-2019	Zotu162	1	0	0	0	0	0	0	5	189	14	2	2103	4	109	12	0	0	0	0	17	0	1	0	10	683	122	74	14	0	0	0	0	0	0	0	0	0	0	0	0	0	0
Eukaryota	Cnidaria	Anthozoa	Scleractinia	Fungiidae		Fungiidae sp. YO-2019	Zotu238	1	0	0	0	0	0	0	0	105	0	0	1	0	1477	0	0	0	0	0	0	0	0	0	0	0	0	0	0	0	0	0	0	0	0	0	0	0	0	0	0	0	0
Eukaryota	Cnidaria	Anthozoa	Scleractinia	Fungiidae		Fungiidae sp. YO-2019	Zotu324	1	0	0	0	0	0	0	6	46	4	0	628	2	6	170	0	0	0	0	134	0	2	0	0	0	49	28	22	0	0	0	0	0	0	0	0	0	0	0	0	0	0
Eukaryota	Cnidaria	Anthozoa	Scleractinia	Lobophylliidae	Acanthastrea	Acanthastrea echinata	Zotu1665	1	0	0	0	0	0	0	0	0	0	0	0	0	0	0	0	1	0	0	0	0	0	0	0	0	0	0	0	0	0	0	0	0	0	0	0	0	0	0	0	1	0
Eukaryota	Cnidaria	Anthozoa	Scleractinia	Lobophylliidae	Acanthastrea	Acanthastrea hemprichii	Zotu1306	1	0	0	0	0	0	0	0	0	0	0	0	0	0	0	40	0	0	0	0	0	0	0	0	0	0	0	0	0	0	0	0	0	0	0	0	0	0	0	0	3	0
Eukaryota	Cnidaria	Anthozoa	Scleractinia	Lobophylliidae	Echinophyllia	dropped	Zotu928	4	0	0	0	0	0	0	0	0	0	0	0	0	0	0	0	0	0	0	0	0	0	0	0	0	0	0	0	0	0	0	0	0	0	0	0	0	0	0	0	0	0
Eukaryota	Cnidaria	Anthozoa	Scleractinia	Merulinidae	Favites	Favites abdita	Zotu1776	1	0	0	0	0	0	0	0	0	0	0	0	0	0	0	26	9	0	0	0	0	0	0	0	0	0	0	0	0	0	0	0	0	0	0	0	0	0	0	0	4	0
Eukaryota	Cnidaria	Anthozoa	Scleractinia	Merulinidae	Goniastrea	Goniastrea edwardsi	Zotu354	1	0	0	0	3	4	0	0	2	1	0	1	6	96	0	0	21	1	6	8	763	0	0	0	0	0	0	1	0	0	0	0	0	1	0	0	0	7	0	24	8	0
Eukaryota	Cnidaria	Anthozoa	Scleractinia	Merulinidae	Goniastrea	Goniastrea edwardsi	Zotu524	1	0	0	0	0	0	0	0	1	0	0	1	9	338	0	0	0	3	28	0	429	0	0	0	0	14	0	1	0	0	2	0	0	0	0	0	0	5	0	3	0	0
Eukaryota	Cnidaria	Anthozoa	Scleractinia	Merulinidae	Goniastrea	Goniastrea edwardsi	Zotu640	1	0	1	0	2	1	0	0	4	0	3	5	13	34	2	0	0	1	12	4	468	0	0	0	1	0	0	0	0	0	0	0	0	0	0	0	0	0	0	0	0	5
Eukaryota	Cnidaria	Anthozoa	Scleractinia	Merulinidae	Goniastrea	Goniastrea edwardsi	Zotu936	1	0	0	3	0	0	0	0	0	0	1	2	17	27	1	0	1	6	2	5	119	0	0	0	3	0	6	0	0	0	0	0	0	3	0	0	0	0	0	1	0	0
Eukaryota	Cnidaria	Anthozoa	Scleractinia	Merulinidae	Paragoniastrea	Paragoniastrea australensis	Zotu553	1	0	0	1	0	0	0	0	0	0	0	0	0	4	0	1	6	1	0	1	38	0	0	0	1	0	0	0	0	0	0	0	0	0	0	0	0	0	0	0	0	0
Eukaryota	Cnidaria	Anthozoa	Scleractinia	Pocilloporidae	Pocillopora	dropped	Zotu880	4	0	0	0	0	0	0	0	0	0	0	0	0	0	0	0	0	0	0	0	0	0	0	0	0	0	0	0	0	0	0	0	0	0	0	0	0	0	1	6	1	0
Eukaryota	Cnidaria	Anthozoa	Scleractinia	Pocilloporidae	Pocillopora	dropped	Zotu1116	4	0	0	0	0	0	0	0	0	0	0	0	0	0	0	0	0	0	1	0	0	0	0	0	0	0	0	0	0	0	0	0	0	0	0	0	0	2	2	11	2	0
Eukaryota	Cnidaria	Anthozoa	Scleractinia	Poritidae	dropped	dropped	Zotu2	4	2	513	691	46	164	0	0	1609	1805	380	11194	1411	9898	4510	2955	540	36077	15830	8546	13489	11735	56	144	199	6471	4522	185	115	15155	9108	4882	2621	2923	892	7345	916	9	187	8	10	6108
Eukaryota	Cnidaria	Anthozoa	Scleractinia	Poritidae	dropped	dropped	Zotu15	4	0	128	310	0	0	0	0	285	734	54	1704	217	4276	2	4325	66	1441	2401	2513	634	1433	0	0	138	2530	1269	12	3	1229	6942	3171	823	2	255	689	0	0	0	0	6	1157
Eukaryota	Cnidaria	Anthozoa	Scleractinia	Poritidae	dropped	dropped	Zotu18	3	0	71	0	0	0	0	0	0	957	0	420	195	10	377	4	25	240	261	446	617	480	1	0	55	438	1455	0	0	84	3155	39	336	0	1	7	1	0	0	0	0	1141
Eukaryota	Cnidaria	Anthozoa	Scleractinia	Poritidae	dropped	dropped	Zotu19	3	0	7	10	12	0	0	0	5	573	72	1560	2900	360	789	17	45	3032	6853	1696	763	680	0	0	0	1046	602	6	1	934	2664	62	98	15	77	2449	50	185	652	0	0	149
Eukaryota	Cnidaria	Anthozoa	Scleractinia	Poritidae	dropped	dropped	Zotu50	3	0	22	46	0	0	0	0	241	1	38	10	2837	599	9	128	2109	8	1117	376	122	122	0	0	34	436	1096	0	2	210	24	22	1	768	3	191	152	0	70	16	0	437
Eukaryota	Cnidaria	Anthozoa	Scleractinia	Poritidae	dropped	dropped	Zotu77	3	0	0	78	8	1	0	0	2	19	30	1080	76	24	641	114	1333	7	35	256	22	4	12	0	1	151	323	1	1	50	1836	215	0	2985	5	112	4	0	3	1	2	463
Eukaryota	Cnidaria	Anthozoa	Scleractinia	Poritidae	dropped	dropped	Zotu308	3	0	0	0	0	0	0	0	0	25	0	900	0	0	8	52	166	0	0	148	0	0	0	0	0	0	291	25	0	108	0	29	0	0	0	0	0	2	10	0	18	0
Eukaryota	Cnidaria	Anthozoa	Scleractinia	Poritidae	Goniopora	dropped	Zotu71	2	0	0	0	0	0	0	0	0	0	0	0	0	0	0	0	0	0	0	0	0	0	0	0	0	0	0	0	0	0	0	0	0	0	0	0	0	0	0	0	0	0
Eukaryota	Cnidaria	Anthozoa	Scleractinia	Poritidae	Goniopora	dropped	Zotu95	2	0	0	0	0	0	0	0	0	0	0	0	0	0	0	0	0	0	0	0	0	0	0	0	0	0	0	0	0	0	0	0	0	0	0	0	0	0	0	0	0	0
Eukaryota	Cnidaria	Anthozoa	Scleractinia	Poritidae	Goniopora	dropped	Zotu103	2	0	0	0	0	0	0	0	0	0	0	0	0	0	0	0	0	0	0	0	0	0	0	0	0	0	0	0	0	0	0	0	0	0	0	0	0	0	0	0	0	0
Eukaryota	Cnidaria	Anthozoa	Scleractinia	Poritidae	Goniopora	dropped	Zotu241	3	0	0	0	0	0	0	0	0	0	0	0	0	0	0	0	0	0	0	0	0	0	0	0	0	0	0	0	0	0	0	0	0	0	0	0	0	0	0	0	0	124
Eukaryota	Cnidaria	Anthozoa	Scleractinia	Poritidae	Goniopora	dropped	Zotu574	3	0	0	0	0	0	0	0	0	0	0	0	0	0	0	0	0	0	0	0	0	0	0	0	0	0	0	0	0	0	0	0	0	0	0	0	0	0	0	0	0	5
Eukaryota	Cnidaria	Anthozoa	Scleractinia	Poritidae	Goniopora	Goniopora cf. fruticosa YFK-2014	Zotu80	1	0	0	0	0	0	0	0	0	0	0	0	0	0	0	0	0	0	0	0	0	0	0	0	0	0	0	0	0	0	0	0	0	0	0	0	0	0	0	0	0	0
Eukaryota	Cnidaria	Anthozoa	Scleractinia	Poritidae	Porites	dropped	Zotu5	2	20	70	402	108	15	1	0	52	771	157	1495	2336	1665	735	129	2811	4318	2354	3611	1225	1195	23	0	63	1165	7154	6	178	472	6487	893	5280	151	7600	3102	8784	228	94	1	0	1347
Eukaryota	Cnidaria	Anthozoa	Scleractinia	Poritidae	Porites	dropped	Zotu8	2	9	121	2042	1179	72	4	7	147	505	1301	2650	2005	4445	2400	2113	3272	3890	9640	2697	2437	5706	18	1076	567	1211	2548	7	50	400	837	3896	181	2948	77	977	1710	0	63	3	169	1022
Eukaryota	Cnidaria	Anthozoa	Scleractinia	Poritidae	Porites	dropped	Zotu36	4	0	0	1513	359	7865	0	5	0	132	30	2	218	27	119	217	10	6	1	0	6	3977	30	1500	907	425	41	8	5	5	2	2084	2726	0	4900	3	4623	0	0	0	0	187
Eukaryota	Cnidaria	Anthozoa	Scleractinia	Poritidae	Porites	dropped	Zotu37	2	0	26	724	494	24	2	7	39	106	138	705	1015	1027	346	84	192	1036	2337	717	662	318	0	2	1285	421	1620	5	40	32	325	80	101	514	2	574	476	0	4	0	0	249
Eukaryota	Cnidaria	Anthozoa	Scleractinia	Poritidae	Porites	dropped	Zotu40	3	0	52	0	2	0	0	11	0	0	0	152	772	212	0	18	71	352	6	380	3	5	0	0	2073	109	255	0	14	55	1040	26	0	0	0	692	0	0	1	0	0	1615
Eukaryota	Cnidaria	Anthozoa	Scleractinia	Poritidae	Porites	dropped	Zotu44	4	0	10	922	271	478	0	0	21	110	43	1385	605	404	535	1014	636	730	1054	809	277	386	5	1	492	575	1037	6	10	150	1194	1785	1218	1542	2070	337	2280	0	374	0	1	311
Eukaryota	Cnidaria	Anthozoa	Scleractinia	Poritidae	Porites	dropped	Zotu89	4	0	31	356	75	1976	0	0	1	135	51	558	82	312	168	142	244	691	213	297	34	79	3	8	43	164	170	3	0	636	1854	654	2572	8	4256	1245	4082	25	51	0	0	219
Eukaryota	Cnidaria	Anthozoa	Scleractinia	Poritidae	Porites	dropped	Zotu194	3	0	0	1	1	0	0	0	1	0	1	6	0	16	4	775	6	2	1	4	2	3	0	0	1	3	3	0	0	0	14	0	0	8	0	1	1	0	961	0	0	0
Eukaryota	Cnidaria	Anthozoa	Scleractinia	Poritidae	Porites	dropped	Zotu750	2	0	2	7	2	0	0	0	2	5	6	270	173	1275	0	145	23	645	6	0	450	4	1	1	1	111	48	0	0	0	142	135	0	0	0	252	1	0	36	0	1	38
Eukaryota	Cnidaria	Anthozoa	Scleractinia	Poritidae	Porites	dropped	Zotu932	2	0	0	0	0	0	0	0	0	0	0	4	0	5	2	169	100	2	4	0	0	4	0	0	0	1	0	0	0	2	1	0	0	0	0	3	0	0	10	12	47	0
Eukaryota	Cnidaria	Anthozoa	Scleractinia	Poritidae	Porites	Porites lobata	Zotu63	1	0	54	1209	344	1134	11	0	10	169	455	557	173	975	521	742	152	442	535	266	34	3737	76	2629	186	317	78	16	0	91	161	1227	144	305	19	507	1180	0	18	3	0	322
Eukaryota	Cnidaria	Anthozoa	Scleractinia	Poritidae	Porites	Porites lobata	Zotu143	1	0	1	206	849	0	12	0	2	2	43	450	700	1664	1	39	4	472	1	0	524	1	3	0	1	225	343	0	0	0	82	523	0	0	0	247	0	0	0	0	0	144
Eukaryota	Cnidaria	Anthozoa	Scleractinia	Poritidae	Porites	Porites lobata	Zotu161	1	0	28	76	57	54	0	0	72	12	88	31	179	517	16	161	2760	16	126	245	23	70	0	0	28	96	144	4	0	251	418	18	86	791	196	118	549	1	105	939	0	172
Eukaryota	Cnidaria	Anthozoa	Scleractinia	Poritidae	Porites	Porites lobata	Zotu196	1	4	36	647	654	0	1	0	15	3	122	235	53	114	276	636	2725	40	1010	485	538	302	1	0	3	69	35	0	11	142	246	159	12	256	5	437	801	0	57	0	1	169
Eukaryota	Cnidaria	Anthozoa	Scleractinia	Poritidae	Porites	Porites lutea	Zotu45	1	1	19	670	334	2766	0	12	39	11	302	291	178	123	144	965	3306	299	425	350	992	1468	84	65	189	110	153	3	24	3315	386	551	3571	133	5761	828	5356	0	17	56	1	394
Eukaryota	Cnidaria	Anthozoa	Scleractinia	Poritidae	Porites	Porites monticulosa	Zotu9	1	0	0	0	0	0	0	0	0	0	0	0	0	0	0	0	0	0	1	0	0	27	23376	9872	5796	117	10	13057	10895	0	0	0	0	0	0	0	0	0	0	1	0	0
Eukaryota	Cnidaria	Anthozoa	Scleractinia		Leptastrea	Leptastrea pruinosa	Zotu20	1	0	0	0	1	169	775	75	38	257	24	0	10	0	0	6646	3104	0	0	293	0	2349	0	0	0	0	15	0	14	1	0	101	0	0	82	319	10	35207	1287	23	176	0
Eukaryota	Cnidaria	Anthozoa	Scleractinia		Leptastrea	Leptastrea pruinosa	Zotu59	1	0	0	0	0	0	0	0	0	0	0	0	0	0	0	2366	21	0	0	0	0	7788	0	0	0	0	0	0	0	0	0	0	0	0	0	0	0	18	153	0	0	0
Eukaryota	Cnidaria	Anthozoa	Scleractinia		Leptastrea	Leptastrea pruinosa	Zotu81	1	0	0	0	1	2	88	14	5	36	2	1	0	0	0	2517	10	0	0	26	0	28	0	0	0	0	0	0	26	0	2	11	0	0	0	110	0	4107	72	0	23	0
Eukaryota	Cnidaria	Anthozoa	Zoantharia	Zoanthidae	Zoanthus	Zoanthus sansibaricus	Zotu1119	1	0	0	0	0	0	0	0	0	0	0	0	0	0	0	0	0	0	0	0	0	0	0	0	0	0	0	0	0	0	0	0	0	0	0	0	0	0	0	0	0	0
Eukaryota	dropped	dropped	dropped	dropped	dropped	dropped	Zotu4	5	10	64	2820	1404	1529	3	37	368	269	1797	2398	5750	1038	979	2412	8901	4718	2928	2353	2871	20109	592	5809	3857	1561	7975	120	2112	8193	2308	5705	4675	1251	7606	1967	7278	1	272	6	13	3123
Eukaryota	dropped	dropped	dropped	dropped	dropped	dropped	Zotu27	2	0	0	0	0	0	0	0	1	0	1	0	0	0	0	0	0	0	1	0	0	41	24311	16348	10405	717	154	18809	15432	0	0	0	0	0	0	0	0	0	0	0	0	0
Eukaryota	Porifera	Demospongiae	Clionaida	Placospongiidae	Placospongia	dropped	Zotu295	4	0	0	0	0	0	0	0	0	0	0	0	0	0	0	0	0	0	0	0	0	0	0	0	0	0	0	0	0	0	0	0	0	0	0	0	0	0	0	0	0	0
Eukaryota	Porifera	Demospongiae	Dictyoceratida	Dysideidae	dropped	dropped	Zotu210	7	1	0	0	0	0	0	0	0	0	0	0	0	0	0	0	0	0	0	0	0	0	0	0	0	0	0	0	0	0	0	0	0	0	0	0	0	0	0	0	0	0
Eukaryota	Porifera	Demospongiae	Dictyoceratida	Dysideidae	Dysidea	Dysidea sp. 2 LNP-2018	Zotu137	1	0	0	0	0	0	0	0	0	0	0	0	0	0	0	0	0	0	0	0	0	0	0	0	0	0	0	0	0	0	0	0	0	0	0	0	0	0	0	0	0	510
Eukaryota	Porifera	Demospongiae	Dictyoceratida	Dysideidae	Dysidea	Dysidea sp. 2 LNP-2018	Zotu307	1	0	0	0	0	0	0	0	0	0	0	0	0	0	0	0	0	0	0	0	0	0	0	0	0	0	0	0	0	0	0	0	0	0	0	0	0	0	0	0	0	0
Eukaryota	Porifera	Demospongiae	Suberitida	Halichondriidae	Hymeniacidon	Hymeniacidon flavia	Zotu566	1	0	0	0	0	0	0	0	0	0	0	0	0	0	0	0	0	0	0	0	0	0	0	0	0	0	0	0	0	0	0	0	0	0	0	0	0	0	0	0	0	0
Eukaryota		dropped	dropped	dropped	dropped	dropped	Zotu145	2	0	0	0	0	0	0	0	0	0	0	0	0	0	0	0	0	0	0	0	0	0	0	0	0	0	0	0	0	0	0	0	0	0	0	0	0	0	0	0	0	0
Eukaryota			Sticholonchida	Sticholonchidae	Sticholonche	Sticholonche sp. JB-2011	Zotu289	1	0	0	0	0	0	0	0	0	0	0	0	0	0	0	0	0	0	0	0	0	0	0	0	0	0	0	0	0	0	0	0	0	0	0	0	0	0	0	0	0	0
Eukaryota			Sticholonchida	Sticholonchidae	Sticholonche	Sticholonche sp. JB-2011	Zotu462	1	0	0	0	0	0	0	0	0	0	0	0	0	0	0	0	0	0	0	0	0	0	0	0	0	0	0	0	0	0	0	0	0	0	0	0	0	0	0	0	0	0
Eukaryota						uncultured eukaryote	Zotu25	1	0	0	0	0	0	0	0	0	0	0	0	0	0	0	0	0	0	0	0	0	0	0	0	0	0	0	0	0	0	0	0	0	0	0	0	0	0	0	0	0	0
Eukaryota						uncultured eukaryote	Zotu879	1	0	0	0	0	0	0	0	0	0	0	0	0	0	0	0	0	0	0	0	0	0	0	0	0	0	0	0	0	0	0	0	0	0	0	0	0	0	0	0	0	0
Eukaryota						uncultured eukaryote	Zotu1534	1	0	0	0	0	0	0	0	0	0	0	0	0	0	0	0	0	0	0	0	0	0	0	0	0	0	0	0	0	0	0	0	0	0	0	0	0	0	0	0	0	0
Eukaryota						uncultured fungus	Zotu1740	1	0	0	0	0	0	0	0	0	0	0	0	0	0	0	0	0	0	0	0	0	0	0	0	0	0	0	0	0	0	0	0	0	0	0	0	0	0	0	0	0	0
[truncated: 35 more columns]

## Sheet: ITS2_ZOTUS_CLEAN
S1 Appendix. 18Suni assay and ITS2 assay ZOTU assignment based on DNA isolated from seawater and oval butterflyfish (Chaetodon lunulatus) gut samples collected at 10 sites from Dongsha Atoll (Taiwan) in the South China Sea. The numbers in cells are the number of unique reads per ZOTU. BLANK4 refers to one of the extraction blanks that produced reads, indicated by the highlighted rows in yellow, w…
domain	phylum	class	order	family	genus	species	ZOTU	Clu1a	Clu2a	Clu3a	Clu4a	Clu5a	Clu6a	Clu7a	Clu8a	Clu9a	Clu10a	Clu11a	Clu12a	Clu13a	Clu14a	Clu15a	Clu16a	Clu17a	Clu18a	Clu19a	Clu20a	Clu21a	Clu22a	Clu23a	Clu24a	Clu25a	Clu26a	Clu27a	Clu28b	Clu29b	Clu30b	Clu32b	Clu33b	Clu34b	Clu35b	Clu36b	Clu37b	Clu38b	Clu39b	Clu40b	DGX1	DGX2	DGX3
Eukaryota	Acanthocephala	Palaeacanthocephala		Transvenidae	Pararhadinorhynchus	Pararhadinorhynchus sp. JYW-2010	Zotu26	0	0	0	0	0	0	0	0	0	0	0	0	0	0	0	0	0	0	0	0	0	0	0	0	0	0	0	0	0	0	0	0	0	0	0	0	0	0	0	0	0	0
Eukaryota	Arthropoda	Hexanauplia	Poecilostomatoida	Oncaeidae	Oncaea	Oncaea venusta	Zotu1184	0	0	0	0	0	0	0	0	0	0	0	0	0	0	0	0	0	0	0	0	0	0	0	0	0	0	0	0	0	0	0	0	0	0	0	0	0	0	0	0	0	0
Eukaryota	Ascomycota	Dothideomycetes	Pleosporales	Pleosporaceae		uncultured Cochliobolus	Zotu1382	0	0	0	0	0	0	0	0	0	0	0	0	0	0	0	0	0	0	0	0	0	0	0	0	0	0	0	0	0	0	0	0	0	0	0	0	0	0	0	0	0	0
Eukaryota	Ascomycota	Sordariomycetes	Hypocreales	Hypocreaceae		uncultured Trichoderma	Zotu306	0	0	0	0	0	0	0	0	0	0	0	0	0	0	0	0	0	0	0	0	0	0	0	0	0	0	0	0	0	0	0	0	0	0	0	0	0	0	0	207	0	33
Eukaryota	Ascomycota	Sordariomycetes	Hypocreales	Hypocreaceae		uncultured Trichoderma	Zotu463	0	0	0	0	0	0	0	0	0	0	0	0	0	0	0	0	0	0	0	0	0	0	0	0	0	0	0	0	0	0	0	0	0	0	0	0	0	0	0	0	0	0
Eukaryota	Ascomycota					uncultured Ascomycota	Zotu902	0	0	0	0	0	0	0	0	0	0	0	0	0	0	0	0	0	0	0	0	0	0	0	0	0	0	0	0	0	0	0	0	0	0	0	0	0	0	0	0	0	0
Eukaryota	Ascomycota					uncultured Ascomycota	Zotu1627	0	0	0	0	0	0	0	0	0	0	0	0	0	0	0	0	0	0	0	0	0	0	0	0	0	0	0	0	0	0	0	0	0	0	0	0	0	0	0	0	0	0
Eukaryota	Ascomycota					uncultured Ascomycota	Zotu1834	0	0	0	0	0	0	0	0	0	0	0	0	0	0	0	0	0	0	0	0	0	0	0	0	0	0	0	0	0	0	0	0	0	0	0	0	0	0	0	0	0	0
Eukaryota	Basidiomycota	Agaricomycetes	Polyporales	Polyporaceae		uncultured Lenzites	Zotu192	0	0	0	0	0	0	0	0	0	0	0	0	0	0	0	0	0	0	0	0	0	0	0	0	0	0	0	0	0	0	0	0	0	0	0	0	0	0	0	0	0	0
Eukaryota	Basidiomycota					uncultured Basidiomycota	Zotu419	0	0	0	0	0	0	0	0	0	0	0	0	0	0	0	0	0	0	0	0	0	0	0	0	0	0	0	0	0	0	0	0	0	0	0	0	0	0	0	1	547	7
Eukaryota	Basidiomycota					uncultured Basidiomycota	Zotu937	0	0	0	0	0	0	0	0	0	0	0	0	0	0	0	0	0	0	0	0	0	0	0	0	0	0	0	0	0	0	0	0	0	0	0	0	0	0	0	86	0	0
Eukaryota	Chlorophyta	Mamiellophyceae	Mamiellales	Bathycoccaceae	Ostreococcus	dropped	Zotu1232	0	0	0	0	0	0	0	0	0	0	0	0	0	0	0	0	0	0	0	0	0	0	0	0	0	0	0	0	0	0	0	0	0	0	0	0	0	0	0	1	0	1
Eukaryota	Chlorophyta	Mamiellophyceae	Mamiellales	dropped	dropped	dropped	Zotu1460	0	0	0	0	0	0	0	0	0	0	0	0	0	0	0	0	0	0	0	0	0	0	0	0	0	0	0	0	0	0	0	0	0	0	0	0	0	0	0	0	0	1
Eukaryota	Ciliophora	Oligohymenophorea	Sessilida	Vorticellidae	Vorticella	Vorticella sp. 23 PS-2013	Zotu832	0	0	0	0	0	0	0	0	0	0	0	0	0	0	0	0	0	0	0	0	0	0	0	0	0	0	0	0	0	0	0	0	0	0	0	0	0	0	0	0	0	0
Eukaryota	Ciliophora	Spirotrichea	Tintinnida	Codonellopsidae	Laackmanniella	Laackmanniella prolongata	Zotu1062	0	0	0	0	0	0	0	0	0	0	0	0	0	0	0	0	0	0	0	0	0	0	0	0	0	0	0	0	0	0	0	0	0	0	0	0	0	0	0	1	0	0
Eukaryota	Cnidaria	Anthozoa	Alcyonacea	Alcyoniidae	Sarcophyton	Sarcophyton auritum	Zotu1004	0	0	0	0	0	0	0	0	0	0	0	0	0	0	0	0	0	0	0	0	0	0	0	0	0	0	0	0	0	0	0	0	0	0	0	0	0	0	0	0	0	0
Eukaryota	Cnidaria	Anthozoa	Alcyonacea	Alcyoniidae	Sinularia	Sinularia polydactyla	Zotu257	0	0	0	0	0	0	0	0	0	0	0	0	0	0	0	0	0	0	0	0	0	0	0	0	0	0	0	0	0	0	0	0	0	0	0	0	0	0	0	0	0	0
Eukaryota	Cnidaria	Anthozoa	Alcyonacea	Clavulariidae	Pachyclavularia	Pachyclavularia sp. I001	Zotu11	0	0	0	0	0	0	0	0	0	0	0	0	0	0	0	0	0	0	0	0	0	0	0	0	0	0	0	0	0	0	0	0	0	0	0	0	0	0	0	0	0	0
Eukaryota	Cnidaria	Anthozoa	Helioporacea	Helioporidae	Heliopora	Heliopora sp. 1 NGW-2018	Zotu394	0	0	0	0	0	0	0	0	0	0	0	0	0	0	0	0	0	0	0	0	0	0	0	0	0	0	0	0	0	0	0	0	0	0	0	0	0	0	0	0	0	0
Eukaryota	Cnidaria	Anthozoa	Helioporacea	Lithotelestidae	Nanipora	dropped	Zotu125	0	0	0	0	0	0	0	0	0	0	0	0	0	0	0	0	0	0	0	0	0	0	0	0	0	0	0	0	0	0	0	0	0	0	0	0	0	0	0	0	0	0
Eukaryota	Cnidaria	Anthozoa	Scleractinia	Acroporidae	Montipora	dropped	Zotu53	1	2482	3	0	0	0	0	0	0	0	0	3	0	26	11	3	26	8	0	0	0	0	0	0	0	0	0	0	0	0	0	0	0	0	1	2	4	1	0	908	48	636
Eukaryota	Cnidaria	Anthozoa	Scleractinia	Acroporidae	Montipora	dropped	Zotu100	0	3	0	0	0	0	0	0	0	0	0	0	0	1	0	0	0	0	0	0	0	0	0	0	0	0	0	0	0	0	0	0	0	0	0	0	0	0	0	0	0	0
Eukaryota	Cnidaria	Anthozoa	Scleractinia	Acroporidae	Montipora	dropped	Zotu153	0	14	1	0	0	0	0	0	0	0	0	0	0	0	0	0	1	0	0	0	0	0	0	0	0	0	0	0	0	0	0	0	0	0	0	0	0	0	0	122	14	15
Eukaryota	Cnidaria	Anthozoa	Scleractinia	Acroporidae	Montipora	dropped	Zotu223	0	44	6	0	0	0	0	0	0	0	0	0	0	0	0	1	1	0	0	0	0	0	0	0	0	0	0	0	0	0	0	0	0	0	0	0	0	0	0	640	69	176
Eukaryota	Cnidaria	Anthozoa	Scleractinia	Acroporidae	Montipora	dropped	Zotu227	0	3	0	0	0	0	0	0	0	0	0	0	0	0	0	0	2	0	0	0	0	0	0	0	0	0	0	0	0	0	0	0	0	0	0	0	0	0	0	56	10	5
Eukaryota	Cnidaria	Anthozoa	Scleractinia	Acroporidae	Montipora	dropped	Zotu240	0	205	0	0	0	0	0	0	0	3	0	13	0	47	0	2	12	1	0	0	0	0	0	0	0	0	0	0	0	0	0	0	0	0	60	12	1	0	0	288	6	68
Eukaryota	Cnidaria	Anthozoa	Scleractinia	Acroporidae	Montipora	dropped	Zotu262	2	189	0	0	0	0	0	0	0	0	0	13	0	103	68	3	10	22	8	0	0	0	0	0	0	0	0	0	0	0	0	0	0	0	0	3	5	0	0	277	0	0
Eukaryota	Cnidaria	Anthozoa	Scleractinia	Acroporidae	Montipora	dropped	Zotu443	2	12	0	0	0	0	0	0	0	0	0	0	0	0	0	0	1	0	0	0	0	0	0	0	0	0	0	0	0	0	0	0	0	0	0	0	0	0	0	0	0	21
Eukaryota	Cnidaria	Anthozoa	Scleractinia	Acroporidae	Montipora	dropped	Zotu501	0	57	0	0	0	0	0	0	0	0	0	0	0	28	137	0	6	2	0	0	0	0	0	0	0	0	0	0	0	0	0	0	0	0	0	0	5	9	1	0	0	0
Eukaryota	Cnidaria	Anthozoa	Scleractinia	Acroporidae	Montipora	dropped	Zotu607	1	6	0	0	1	0	0	0	0	0	0	1	0	10	0	0	1	1	1	0	0	0	0	0	0	0	0	0	0	0	0	0	0	0	0	33	0	0	1	235	0	0
Eukaryota	Cnidaria	Anthozoa	Scleractinia	Acroporidae	Montipora	dropped	Zotu668	1	115	0	0	0	0	0	0	0	0	0	3	0	24	30	0	2	2	0	0	0	0	0	0	0	0	0	0	0	0	0	0	0	0	0	0	0	0	0	65	5	17
Eukaryota	Cnidaria	Anthozoa	Scleractinia	Acroporidae	Montipora	dropped	Zotu780	0	68	0	0	0	0	0	0	0	0	0	0	0	20	10	1	7	0	1	0	0	0	0	0	0	0	0	0	0	0	0	0	0	0	0	0	7	0	1	125	0	13
Eukaryota	Cnidaria	Anthozoa	Scleractinia	Acroporidae	Montipora	dropped	Zotu1149	0	0	0	0	0	0	0	0	0	0	0	0	0	0	0	0	0	0	0	0	0	0	0	0	0	0	0	0	0	0	0	0	0	0	0	0	7	37	0	0	0	0
Eukaryota	Cnidaria	Anthozoa	Scleractinia	Acroporidae	Montipora	dropped	Zotu1251	1	4	0	0	0	0	0	0	0	0	0	0	0	12	18	0	0	0	0	0	0	0	0	0	0	0	0	0	0	0	0	0	0	0	0	0	0	0	0	1	0	0
Eukaryota	Cnidaria	Anthozoa	Scleractinia	Acroporidae	Montipora	dropped	Zotu1328	1	10	3	0	0	0	0	0	0	0	0	1	0	14	0	0	3	0	0	0	0	0	0	0	0	0	0	0	0	4	0	0	0	0	0	6	0	0	0	9	0	3
Eukaryota	Cnidaria	Anthozoa	Scleractinia	Acroporidae	Montipora	dropped	Zotu1589	0	17	0	0	0	0	0	0	0	0	0	0	0	2	1	0	1	0	0	0	0	0	0	0	0	0	0	0	0	0	0	0	0	0	0	1	0	0	0	0	0	3
Eukaryota	Cnidaria	Anthozoa	Scleractinia	Acroporidae	Montipora	dropped	Zotu1642	0	0	0	0	0	0	0	0	0	3	0	0	0	0	0	0	0	0	0	0	0	0	0	0	0	0	0	0	0	0	16	0	0	0	0	0	0	0	0	0	0	0
Eukaryota	Cnidaria	Anthozoa	Scleractinia	Acroporidae	Montipora	Montipora dilatata	Zotu201	3	480	1	0	0	0	2	0	0	14	0	2	0	39	17	3	34	5	0	0	0	0	0	0	0	0	0	0	0	0	0	0	0	0	0	5	9	1	0	82	713	124
Eukaryota	Cnidaria	Anthozoa	Scleractinia	Acroporidae	Montipora	Montipora dilatata	Zotu376	1	3	0	0	0	0	0	0	0	0	0	0	0	2	0	0	0	0	0	0	0	0	0	0	0	0	0	0	0	0	0	0	0	0	0	0	0	0	0	12	0	4
Eukaryota	Cnidaria	Anthozoa	Scleractinia	Acroporidae	Montipora	Montipora dilatata	Zotu662	1	116	0	0	0	0	0	0	0	0	0	0	0	2	0	0	0	0	0	0	0	0	0	0	0	0	0	0	0	0	0	0	0	0	0	1	0	0	0	1	0	6
Eukaryota	Cnidaria	Anthozoa	Scleractinia	Acroporidae	Montipora	Montipora flabellata	Zotu674	0	31	0	0	0	0	0	0	0	0	0	1	0	31	95	0	21	0	0	0	0	0	0	0	0	0	0	0	0	0	0	0	0	0	0	1	0	0	1	7	0	10
Eukaryota	Cnidaria	Anthozoa	Scleractinia	Acroporidae	Montipora	Montipora fragilis	Zotu361	0	11	2	0	0	0	0	0	0	0	0	0	0	2	0	0	9	0	0	0	0	0	0	0	0	0	0	0	0	0	0	0	0	0	0	1	0	0	0	289	1	142
Eukaryota	Cnidaria	Anthozoa	Scleractinia	Acroporidae	Montipora	Montipora fragilis	Zotu411	0	0	0	0	0	0	0	0	0	0	0	0	0	0	0	0	0	0	0	0	0	0	0	0	0	0	0	0	0	0	0	0	0	0	0	0	0	0	0	0	0	0
Eukaryota	Cnidaria	Anthozoa	Scleractinia	Acroporidae	Montipora	Montipora gaimardi	Zotu21	1	2	0	0	0	0	0	0	0	0	0	0	0	69	0	0	4	4	0	0	0	0	0	0	0	0	0	0	0	36	0	0	0	13	0	63	0	0	0	0	0	13
Eukaryota	Cnidaria	Anthozoa	Scleractinia	Acroporidae	Montipora	Montipora gaimardi	Zotu917	0	0	0	0	0	0	0	0	0	0	0	0	0	0	0	1	4	0	0	0	0	0	0	0	0	0	0	0	0	0	0	0	0	102	0	0	0	0	0	0	0	0
Eukaryota	Cnidaria	Anthozoa	Scleractinia	Acroporidae	Montipora	Montipora mollis	Zotu1903	0	32	0	0	0	0	0	0	0	2	0	0	0	6	28	5	5	1	4	0	0	0	0	0	0	0	0	0	0	0	0	0	0	0	0	0	0	0	0	5	0	1
Eukaryota	Cnidaria	Anthozoa	Scleractinia	Acroporidae	Montipora	Montipora sp. DM19	Zotu315	1	71	7	0	0	0	0	0	0	3	0	2	0	5	0	2	6	1	0	1	0	0	0	0	0	0	0	0	0	1	0	0	0	0	0	1	0	0	0	161	0	143
Eukaryota	Cnidaria	Anthozoa	Scleractinia	Acroporidae	Montipora	Montipora truncata	Zotu189	0	389	0	0	0	0	0	0	0	0	0	0	0	1	0	0	3	0	0	0	0	0	0	0	0	0	0	0	0	0	0	0	0	0	0	1	1	1	0	109	0	148
Eukaryota	Cnidaria	Anthozoa	Scleractinia	Acroporidae	Montipora	Montipora truncata	Zotu253	9	183	0	0	0	0	0	1	0	1	0	0	0	11	0	2	0	1	0	0	0	0	0	0	0	0	0	0	0	0	0	0	0	0	0	0	1	0	0	5	0	7
Eukaryota	Cnidaria	Anthozoa	Scleractinia	Acroporidae	Montipora	Montipora truncata	Zotu337	0	258	0	0	0	0	0	0	0	0	0	2	0	9	0	1	8	2	0	0	0	0	0	0	0	0	0	0	0	0	0	0	0	0	0	0	0	0	0	251	126	127
Eukaryota	Cnidaria	Anthozoa	Scleractinia	Acroporidae	Montipora	Montipora truncata	Zotu373	1	57	0	0	0	0	0	0	0	0	0	0	0	1	7	0	0	0	0	0	0	0	0	0	0	0	0	0	0	0	0	0	0	0	0	0	0	1	0	15	0	35
Eukaryota	Cnidaria	Anthozoa	Scleractinia	Acroporidae	Montipora	Montipora truncata	Zotu403	6	138	0	0	0	0	0	0	0	0	0	0	0	8	3	0	24	2	0	0	0	0	0	0	0	0	0	0	0	0	0	0	0	0	0	0	0	0	0	173	0	228
Eukaryota	Cnidaria	Anthozoa	Scleractinia	Acroporidae	Montipora	Montipora truncata	Zotu472	0	265	0	0	0	0	0	0	0	0	0	0	0	8	4	1	0	0	0	0	0	0	0	0	0	0	0	0	0	0	0	0	0	0	0	4	1	0	0	249	0	38
Eukaryota	Cnidaria	Anthozoa	Scleractinia	Acroporidae	Montipora	Montipora truncata	Zotu783	0	82	0	0	0	0	0	0	0	2	0	0	0	37	30	0	2	2	0	0	0	0	0	0	0	0	0	0	0	0	0	0	0	0	0	9	4	0	1	48	0	6
Eukaryota	Cnidaria	Anthozoa	Scleractinia	Acroporidae	Montipora	Montipora venosa	Zotu341	0	10	0	0	0	0	0	0	0	2	0	0	0	4	27	0	0	0	0	0	0	0	0	0	0	0	0	0	0	0	0	0	0	0	0	0	1	0	0	3	0	0
Eukaryota	Cnidaria	Anthozoa	Scleractinia	Agariciidae	Pavona	Pavona cactus	Zotu498	0	0	1	375	0	12	0	0	3	0	1	0	0	0	0	0	0	0	1	0	0	0	0	0	0	0	0	0	0	0	0	0	0	0	0	0	0	0	0	0	0	0
Eukaryota	Cnidaria	Anthozoa	Scleractinia	Dendrophylliidae	Turbinaria	Turbinaria mesenterina	Zotu432	15	7	0	7	3	28	0	0	17	8	10	6	195	0	0	0	0	0	0	0	0	0	0	0	0	349	0	0	0	0	0	0	0	0	0	0	0	0	0	0	0	0
Eukaryota	Cnidaria	Anthozoa	Scleractinia	dropped	dropped	dropped	Zotu61	0	0	8	49	0	0	0	0	0	0	2	1	8	394	13757	0	0	0	0	0	0	0	0	0	0	2	0	0	0	34	0	0	1	6	0	0	0	0	0	0	0	0
Eukaryota	Cnidaria	Anthozoa	Scleractinia	Fungiidae	dropped	dropped	Zotu54	1	0	540	0	0	188	2851	223	557	7008	499	893	1590	0	0	1	0	1029	0	44	0	3	1278	5911	1497	235	3	0	0	0	0	0	0	0	18	0	0	0	0	0	0	0
Eukaryota	Cnidaria	Anthozoa	Scleractinia	Fungiidae	Lithophyllon	Lithophyllon scabra	Zotu13	29910	18007	11608	1174	4474	4306	5244	2629	1431	671	1798	29	149	1	0	0	0	2444	14	16	0	0	442	162	210	66	1	5	0	7	0	0	0	30	0	2	0	0	0	0	0	0
Eukaryota	Cnidaria	Anthozoa	Scleractinia	Fungiidae	Lithophyllon	Lithophyllon scabra	Zotu30	5486	15090	2942	249	399	52	79	756	217	55	130	0	14	2	0	0	0	390	0	0	0	0	4	20	1	1	0	21	33	0	0	0	0	11	0	0	0	0	0	0	0	0
Eukaryota	Cnidaria	Anthozoa	Scleractinia	Fungiidae	Lithophyllon	Lithophyllon scabra	Zotu158	763	21	2593	0	114	6	15	306	108	22	157	0	0	0	0	0	0	61	1	1	0	0	0	1	8	3	0	2	3	0	0	0	0	0	0	0	0	0	0	0	0	0
Eukaryota	Cnidaria	Anthozoa	Scleractinia	Fungiidae	Lithophyllon	Lithophyllon scabra	Zotu344	513	136	298	7	176	329	151	68	32	346	43	1	4	1	0	0	0	124	0	5	0	0	77	40	9	0	0	0	0	0	0	0	0	1	0	0	0	0	0	0	0	0
Eukaryota	Cnidaria	Anthozoa	Scleractinia	Fungiidae		Fungiidae sp. YO-2019	Zotu58	3	0	10	1	2	34	545	531	26	8309	180	135	303	0	0	11	0	356	0	467	0	19	124	3822	104	58	0	0	0	0	0	0	0	0	1	0	0	0	0	0	0	0
Eukaryota	Cnidaria	Anthozoa	Scleractinia	Fungiidae		Fungiidae sp. YO-2019	Zotu94	0	0	0	0	0	1	125	27	2	2783	10	115	39	0	0	1	0	48	0	10	0	4	316	1666	32	20	0	0	0	0	0	0	0	0	0	0	0	0	0	0	0	0
Eukaryota	Cnidaria	Anthozoa	Scleractinia	Fungiidae		Fungiidae sp. YO-2019	Zotu106	0	0	247	0	2	16	80	44	18	3740	60	32	130	1	0	0	0	185	0	23	0	0	14	1837	30	7	0	0	0	0	0	0	0	0	2	0	0	0	0	0	0	0
Eukaryota	Cnidaria	Anthozoa	Scleractinia	Fungiidae		Fungiidae sp. YO-2019	Zotu162	0	0	0	0	0	5	189	14	2	2103	4	109	12	0	0	0	0	17	0	1	0	10	683	122	74	14	0	0	0	0	0	0	0	0	0	0	0	0	0	0	0	0
Eukaryota	Cnidaria	Anthozoa	Scleractinia	Fungiidae		Fungiidae sp. YO-2019	Zotu238	0	0	0	0	0	0	105	0	0	1	0	1477	0	0	0	0	0	0	0	0	0	0	0	0	0	0	0	0	0	0	0	0	0	0	0	0	0	0	0	0	0	0
Eukaryota	Cnidaria	Anthozoa	Scleractinia	Fungiidae		Fungiidae sp. YO-2019	Zotu324	0	0	0	0	0	6	46	4	0	628	2	6	170	0	0	0	0	134	0	2	0	0	0	49	28	22	0	0	0	0	0	0	0	0	0	0	0	0	0	0	0	0
Eukaryota	Cnidaria	Anthozoa	Scleractinia	Lobophylliidae	Acanthastrea	Acanthastrea echinata	Zotu1665	0	0	0	0	0	0	0	0	0	0	0	0	0	0	1	0	0	0	0	0	0	0	0	0	0	0	0	0	0	0	0	0	0	0	0	0	0	0	1	0	0	0
Eukaryota	Cnidaria	Anthozoa	Scleractinia	Lobophylliidae	Acanthastrea	Acanthastrea hemprichii	Zotu1306	0	0	0	0	0	0	0	0	0	0	0	0	0	40	0	0	0	0	0	0	0	0	0	0	0	0	0	0	0	0	0	0	0	0	0	0	0	0	3	0	0	0
Eukaryota	Cnidaria	Anthozoa	Scleractinia	Lobophylliidae	Echinophyllia	dropped	Zotu928	0	0	0	0	0	0	0	0	0	0	0	0	0	0	0	0	0	0	0	0	0	0	0	0	0	0	0	0	0	0	0	0	0	0	0	0	0	0	0	0	0	0
Eukaryota	Cnidaria	Anthozoa	Scleractinia	Merulinidae	Favites	Favites abdita	Zotu1776	0	0	0	0	0	0	0	0	0	0	0	0	0	26	9	0	0	0	0	0	0	0	0	0	0	0	0	0	0	0	0	0	0	0	0	0	0	0	4	0	0	0
Eukaryota	Cnidaria	Anthozoa	Scleractinia	Merulinidae	Goniastrea	Goniastrea edwardsi	Zotu354	0	0	3	4	0	0	2	1	0	1	6	96	0	0	21	1	6	8	763	0	0	0	0	0	0	1	0	0	0	0	0	1	0	0	0	7	0	24	8	0	0	0
Eukaryota	Cnidaria	Anthozoa	Scleractinia	Merulinidae	Goniastrea	Goniastrea edwardsi	Zotu524	0	0	0	0	0	0	1	0	0	1	9	338	0	0	0	3	28	0	429	0	0	0	0	14	0	1	0	0	2	0	0	0	0	0	0	5	0	3	0	0	0	0
Eukaryota	Cnidaria	Anthozoa	Scleractinia	Merulinidae	Goniastrea	Goniastrea edwardsi	Zotu640	1	0	2	1	0	0	4	0	3	5	13	34	2	0	0	1	12	4	468	0	0	0	1	0	0	0	0	0	0	0	0	0	0	0	0	0	0	0	0	5	0	0
Eukaryota	Cnidaria	Anthozoa	Scleractinia	Merulinidae	Goniastrea	Goniastrea edwardsi	Zotu936	0	3	0	0	0	0	0	0	1	2	17	27	1	0	1	6	2	5	119	0	0	0	3	0	6	0	0	0	0	0	0	3	0	0	0	0	0	1	0	0	0	5
Eukaryota	Cnidaria	Anthozoa	Scleractinia	Merulinidae	Paragoniastrea	Paragoniastrea australensis	Zotu553	0	1	0	0	0	0	0	0	0	0	0	4	0	1	6	1	0	1	38	0	0	0	1	0	0	0	0	0	0	0	0	0	0	0	0	0	0	0	0	0	0	0
Eukaryota	Cnidaria	Anthozoa	Scleractinia	Pocilloporidae	Pocillopora	dropped	Zotu880	0	0	0	0	0	0	0	0	0	0	0	0	0	0	0	0	0	0	0	0	0	0	0	0	0	0	0	0	0	0	0	0	0	0	0	0	1	6	1	0	0	0
Eukaryota	Cnidaria	Anthozoa	Scleractinia	Pocilloporidae	Pocillopora	dropped	Zotu1116	0	0	0	0	0	0	0	0	0	0	0	0	0	0	0	0	1	0	0	0	0	0	0	0	0	0	0	0	0	0	0	0	0	0	0	2	2	11	2	0	0	0
Eukaryota	Cnidaria	Anthozoa	Scleractinia	Poritidae	dropped	dropped	Zotu15	128	310	0	0	0	0	285	734	54	1704	217	4276	2	4325	66	1441	2401	2513	634	1433	0	0	138	2530	1269	12	3	1229	6942	3171	823	2	255	689	0	0	0	0	6	1157	885	1251
Eukaryota	Cnidaria	Anthozoa	Scleractinia	Poritidae	dropped	dropped	Zotu18	71	0	0	0	0	0	0	957	0	420	195	10	377	4	25	240	261	446	617	480	1	0	55	438	1455	0	0	84	3155	39	336	0	1	7	1	0	0	0	0	1141	17173	68
Eukaryota	Cnidaria	Anthozoa	Scleractinia	Poritidae	dropped	dropped	Zotu19	7	10	12	0	0	0	5	573	72	1560	2900	360	789	17	45	3032	6853	1696	763	680	0	0	0	1046	602	6	1	934	2664	62	98	15	77	2449	50	185	652	0	0	149	1444	77
Eukaryota	Cnidaria	Anthozoa	Scleractinia	Poritidae	dropped	dropped	Zotu50	22	46	0	0	0	0	241	1	38	10	2837	599	9	128	2109	8	1117	376	122	122	0	0	34	436	1096	0	2	210	24	22	1	768	3	191	152	0	70	16	0	437	193	97
Eukaryota	Cnidaria	Anthozoa	Scleractinia	Poritidae	dropped	dropped	Zotu77	0	78	8	1	0	0	2	19	30	1080	76	24	641	114	1333	7	35	256	22	4	12	0	1	151	323	1	1	50	1836	215	0	2985	5	112	4	0	3	1	2	463	1831	1670
Eukaryota	Cnidaria	Anthozoa	Scleractinia	Poritidae	dropped	dropped	Zotu308	0	0	0	0	0	0	0	25	0	900	0	0	8	52	166	0	0	148	0	0	0	0	0	0	291	25	0	108	0	29	0	0	0	0	0	2	10	0	18	0	0	0
Eukaryota	Cnidaria	Anthozoa	Scleractinia	Poritidae	Goniopora	dropped	Zotu71	0	0	0	0	0	0	0	0	0	0	0	0	0	0	0	0	0	0	0	0	0	0	0	0	0	0	0	0	0	0	0	0	0	0	0	0	0	0	0	0	0	0
Eukaryota	Cnidaria	Anthozoa	Scleractinia	Poritidae	Goniopora	dropped	Zotu95	0	0	0	0	0	0	0	0	0	0	0	0	0	0	0	0	0	0	0	0	0	0	0	0	0	0	0	0	0	0	0	0	0	0	0	0	0	0	0	0	0	0
Eukaryota	Cnidaria	Anthozoa	Scleractinia	Poritidae	Goniopora	dropped	Zotu103	0	0	0	0	0	0	0	0	0	0	0	0	0	0	0	0	0	0	0	0	0	0	0	0	0	0	0	0	0	0	0	0	0	0	0	0	0	0	0	0	0	0
Eukaryota	Cnidaria	Anthozoa	Scleractinia	Poritidae	Goniopora	dropped	Zotu241	0	0	0	0	0	0	0	0	0	0	0	0	0	0	0	0	0	0	0	0	0	0	0	0	0	0	0	0	0	0	0	0	0	0	0	0	0	0	0	124	0	20
Eukaryota	Cnidaria	Anthozoa	Scleractinia	Poritidae	Goniopora	dropped	Zotu574	0	0	0	0	0	0	0	0	0	0	0	0	0	0	0	0	0	0	0	0	0	0	0	0	0	0	0	0	0	0	0	0	0	0	0	0	0	0	0	5	0	1
Eukaryota	Cnidaria	Anthozoa	Scleractinia	Poritidae	Goniopora	Goniopora cf. fruticosa YFK-2014	Zotu80	0	0	0	0	0	0	0	0	0	0	0	0	0	0	0	0	0	0	0	0	0	0	0	0	0	0	0	0	0	0	0	0	0	0	0	0	0	0	0	0	0	0
Eukaryota	Cnidaria	Anthozoa	Scleractinia	Poritidae	Porites	dropped	Zotu36	0	1513	359	7865	0	5	0	132	30	2	218	27	119	217	10	6	1	0	6	3977	30	1500	907	425	41	8	5	5	2	2084	2726	0	4900	3	4623	0	0	0	0	187	0	1757
Eukaryota	Cnidaria	Anthozoa	Scleractinia	Poritidae	Porites	dropped	Zotu37	26	724	494	24	2	7	39	106	138	705	1015	1027	346	84	192	1036	2337	717	662	318	0	2	1285	421	1620	5	40	32	325	80	101	514	2	574	476	0	4	0	0	249	60	186
Eukaryota	Cnidaria	Anthozoa	Scleractinia	Poritidae	Porites	dropped	Zotu40	52	0	2	0	0	11	0	0	0	152	772	212	0	18	71	352	6	380	3	5	0	0	2073	109	255	0	14	55	1040	26	0	0	0	692	0	0	1	0	0	1615	2187	168
Eukaryota	Cnidaria	Anthozoa	Scleractinia	Poritidae	Porites	dropped	Zotu44	10	922	271	478	0	0	21	110	43	1385	605	404	535	1014	636	730	1054	809	277	386	5	1	492	575	1037	6	10	150	1194	1785	1218	1542	2070	337	2280	0	374	0	1	311	324	1356
Eukaryota	Cnidaria	Anthozoa	Scleractinia	Poritidae	Porites	dropped	Zotu89	31	356	75	1976	0	0	1	135	51	558	82	312	168	142	244	691	213	297	34	79	3	8	43	164	170	3	0	636	1854	654	2572	8	4256	1245	4082	25	51	0	0	219	348	236
Eukaryota	Cnidaria	Anthozoa	Scleractinia	Poritidae	Porites	dropped	Zotu194	0	1	1	0	0	0	1	0	1	6	0	16	4	775	6	2	1	4	2	3	0	0	1	3	3	0	0	0	14	0	0	8	0	1	1	0	961	0	0	0	0	1
Eukaryota	Cnidaria	Anthozoa	Scleractinia	Poritidae	Porites	dropped	Zotu750	2	7	2	0	0	0	2	5	6	270	173	1275	0	145	23	645	6	0	450	4	1	1	1	111	48	0	0	0	142	135	0	0	0	252	1	0	36	0	1	38	0	24
Eukaryota	Cnidaria	Anthozoa	Scleractinia	Poritidae	Porites	dropped	Zotu932	0	0	0	0	0	0	0	0	0	4	0	5	2	169	100	2	4	0	0	4	0	0	0	1	0	0	0	2	1	0	0	0	0	3	0	0	10	12	47	0	0	0
Eukaryota	Cnidaria	Anthozoa	Scleractinia	Poritidae	Porites	Porites lobata	Zotu63	54	1209	344	1134	11	0	10	169	455	557	173	975	521	742	152	442	535	266	34	3737	76	2629	186	317	78	16	0	91	161	1227	144	305	19	507	1180	0	18	3	0	322	0	313
Eukaryota	Cnidaria	Anthozoa	Scleractinia	Poritidae	Porites	Porites lobata	Zotu143	1	206	849	0	12	0	2	2	43	450	700	1664	1	39	4	472	1	0	524	1	3	0	1	225	343	0	0	0	82	523	0	0	0	247	0	0	0	0	0	144	0	143
Eukaryota	Cnidaria	Anthozoa	Scleractinia	Poritidae	Porites	Porites lobata	Zotu161	28	76	57	54	0	0	72	12	88	31	179	517	16	161	2760	16	126	245	23	70	0	0	28	96	144	4	0	251	418	18	86	791	196	118	549	1	105	939	0	172	21	88
Eukaryota	Cnidaria	Anthozoa	Scleractinia	Poritidae	Porites	Porites monticulosa	Zotu9	0	0	0	0	0	0	0	0	0	0	0	0	0	0	0	0	1	0	0	27	23376	9872	5796	117	10	13057	10895	0	0	0	0	0	0	0	0	0	0	1	0	0	0	0
Eukaryota	Cnidaria	Anthozoa	Scleractinia		Leptastrea	Leptastrea pruinosa	Zotu20	0	0	1	169	775	75	38	257	24	0	10	0	0	6646	3104	0	0	293	0	2349	0	0	0	0	15	0	14	1	0	101	0	0	82	319	10	35207	1287	23	176	0	0	0
Eukaryota	Cnidaria	Anthozoa	Scleractinia		Leptastrea	Leptastrea pruinosa	Zotu59	0	0	0	0	0	0	0	0	0	0	0	0	0	2366	21	0	0	0	0	7788	0	0	0	0	0	0	0	0	0	0	0	0	0	0	0	18	153	0	0	0	0	0
Eukaryota	Cnidaria	Anthozoa	Scleractinia		Leptastrea	Leptastrea pruinosa	Zotu81	0	0	1	2	88	14	5	36	2	1	0	0	0	2517	10	0	0	26	0	28	0	0	0	0	0	0	26	0	2	11	0	0	0	110	0	4107	72	0	23	0	0	0
Eukaryota	Cnidaria	Anthozoa	Zoantharia	Zoanthidae	Zoanthus	Zoanthus sansibaricus	Zotu1119	0	0	0	0	0	0	0	0	0	0	0	0	0	0	0	0	0	0	0	0	0	0	0	0	0	0	0	0	0	0	0	0	0	0	0	0	0	0	0	0	0	53
Eukaryota	dropped	dropped	dropped	dropped	dropped	dropped	Zotu27	0	0	0	0	0	0	1	0	1	0	0	0	0	0	0	0	1	0	0	41	24311	16348	10405	717	154	18809	15432	0	0	0	0	0	0	0	0	0	0	0	0	0	0	0
Eukaryota	Porifera	Demospongiae	Clionaida	Placospongiidae	Placospongia	dropped	Zotu295	0	0	0	0	0	0	0	0	0	0	0	0	0	0	0	0	0	0	0	0	0	0	0	0	0	0	0	0	0	0	0	0	0	0	0	0	0	0	0	0	0	1
Eukaryota	Porifera	Demospongiae	Dictyoceratida	Dysideidae	Dysidea	Dysidea sp. 2 LNP-2018	Zotu137	0	0	0	0	0	0	0	0	0	0	0	0	0	0	0	0	0	0	0	0	0	0	0	0	0	0	0	0	0	0	0	0	0	0	0	0	0	0	0	510	164	255
Eukaryota	Porifera	Demospongiae	Dictyoceratida	Dysideidae	Dysidea	Dysidea sp. 2 LNP-2018	Zotu307	0	0	0	0	0	0	0	0	0	0	0	0	0	0	0	0	0	0	0	0	0	0	0	0	0	0	0	0	0	0	0	0	0	0	0	0	0	0	0	0	0	0
Eukaryota	Porifera	Demospongiae	Suberitida	Halichondriidae	Hymeniacidon	Hymeniacidon flavia	Zotu566	0	0	0	0	0	0	0	0	0	0	0	0	0	0	0	0	0	0	0	0	0	0	0	0	0	0	0	0	0	0	0	0	0	0	0	0	0	0	0	0	0	3
Eukaryota		dropped	dropped	dropped	dropped	dropped	Zotu145	0	0	0	0	0	0	0	0	0	0	0	0	0	0	0	0	0	0	0	0	0	0	0	0	0	0	0	0	0	0	0	0	0	0	0	0	0	0	0	0	0	0
Eukaryota			Sticholonchida	Sticholonchidae	Sticholonche	Sticholonche sp. JB-2011	Zotu289	0	0	0	0	0	0	0	0	0	0	0	0	0	0	0	0	0	0	0	0	0	0	0	0	0	0	0	0	0	0	0	0	0	0	0	0	0	0	0	0	0	0
Eukaryota			Sticholonchida	Sticholonchidae	Sticholonche	Sticholonche sp. JB-2011	Zotu462	0	0	0	0	0	0	0	0	0	0	0	0	0	0	0	0	0	0	0	0	0	0	0	0	0	0	0	0	0	0	0	0	0	0	0	0	0	0	0	0	0	0
Eukaryota						uncultured eukaryote	Zotu25	0	0	0	0	0	0	0	0	0	0	0	0	0	0	0	0	0	0	0	0	0	0	0	0	0	0	0	0	0	0	0	0	0	0	0	0	0	0	0	0	0	0
Eukaryota						uncultured eukaryote	Zotu879	0	0	0	0	0	0	0	0	0	0	0	0	0	0	0	0	0	0	0	0	0	0	0	0	0	0	0	0	0	0	0	0	0	0	0	0	0	0	0	0	0	0
Eukaryota						uncultured eukaryote	Zotu1534	0	0	0	0	0	0	0	0	0	0	0	0	0	0	0	0	0	0	0	0	0	0	0	0	0	0	0	0	0	0	0	0	0	0	0	0	0	0	0	0	0	0
Eukaryota						uncultured fungus	Zotu1740	0	0	0	0	0	0	0	0	0	0	0	0	0	0	0	0	0	0	0	0	0	0	0	0	0	0	0	0	0	0	0	0	0	0	0	0	0	0	0	0	0	0
[truncated: 33 more columns]

## Sheet: ITS2_ZOTUS_CLEAN_WATER
S1 Appendix. 18Suni assay and ITS2 assay ZOTU assignment based on DNA isolated from seawater and oval butterflyfish (Chaetodon lunulatus) gut samples collected at 10 sites from Dongsha Atoll (Taiwan) in the South China Sea. The numbers in cells are the number of unique reads per ZOTU. BLANK4 refers to one of the extraction blanks that produced reads, indicated by the highlighted rows in yellow, w…
domain	phylum	class	order	family	genus	species	ZOTU	DGX1	DGX2	DGX3	DGX4	DGX5	DGX6	DGX7	DGX8	DGX9	DGX10	DGX11	DGX12	DGX13	DGX14	DGX15	DGX16	DGX17	DGX18	DGX19	DGX20	DGX21	DGX22	DGX23	DGX24	DGX25	DGX26	DGX27	DGX28	DGX29	DGX30	DGX31	DGX32	DGX33	DGX34	DGX35	DGX36
Eukaryota	Acanthocephala	Palaeacanthocephala		Transvenidae	Pararhadinorhynchus	Pararhadinorhynchus sp. JYW-2010	Zotu26	0	0	0	0	0	0	0	0	0	0	0	0	0	0	0	3923	17854	0	0	0	0	0	0	0	0	0	0	0	0	0	0	0	0	0	0	0
Eukaryota	Arthropoda	Hexanauplia	Poecilostomatoida	Oncaeidae	Oncaea	Oncaea venusta	Zotu1184	0	0	0	0	0	0	0	0	0	0	0	0	0	0	0	0	0	0	0	0	0	0	0	45	0	0	1	0	0	0	0	0	0	0	0	0
Eukaryota	Ascomycota	Dothideomycetes	Pleosporales	Pleosporaceae		uncultured Cochliobolus	Zotu1382	0	0	0	0	0	0	0	0	0	0	0	0	0	0	0	0	0	0	0	0	0	0	0	0	0	0	0	16	0	0	27	0	0	1	0	0
Eukaryota	Ascomycota	Sordariomycetes	Hypocreales	Hypocreaceae		uncultured Trichoderma	Zotu306	207	0	33	1579	857	0	0	0	0	4	0	0	0	0	14	0	0	0	0	0	0	0	0	0	0	0	0	0	0	0	0	0	0	0	0	0
Eukaryota	Ascomycota	Sordariomycetes	Hypocreales	Hypocreaceae		uncultured Trichoderma	Zotu463	0	0	0	505	0	0	0	0	0	0	0	0	339	0	0	0	0	0	0	0	0	0	0	0	0	0	0	0	0	0	0	0	0	0	0	0
Eukaryota	Ascomycota					uncultured Ascomycota	Zotu902	0	0	0	0	0	0	0	0	0	0	0	0	0	0	47	67	0	0	0	0	0	0	0	0	0	0	0	0	0	0	0	0	0	0	0	0
Eukaryota	Ascomycota					uncultured Ascomycota	Zotu1627	0	0	0	0	0	0	0	0	0	0	0	0	0	0	0	0	0	0	0	0	0	0	0	0	0	0	0	0	0	0	0	1	0	0	4	26
Eukaryota	Ascomycota					uncultured Ascomycota	Zotu1834	0	0	0	0	0	0	0	0	0	0	0	0	0	0	0	0	0	0	0	0	0	0	0	0	0	0	0	0	0	0	0	0	0	0	5	14
Eukaryota	Basidiomycota	Agaricomycetes	Polyporales	Polyporaceae		uncultured Lenzites	Zotu192	0	0	0	0	0	0	0	0	0	0	1	2488	0	0	0	0	0	0	0	0	0	0	0	0	0	0	0	0	0	0	53	0	2	0	0	11
Eukaryota	Basidiomycota					uncultured Basidiomycota	Zotu419	1	547	7	0	0	0	0	0	0	0	0	0	1	7	10	46	0	0	0	0	0	0	0	0	0	0	0	0	0	0	0	0	0	0	0	0
Eukaryota	Basidiomycota					uncultured Basidiomycota	Zotu937	86	0	0	0	0	0	0	0	0	0	0	0	0	2	5	11	0	0	0	0	0	0	0	0	0	0	0	0	0	0	0	0	0	0	0	0
Eukaryota	Chlorophyta	Mamiellophyceae	Mamiellales	Bathycoccaceae	Ostreococcus	dropped	Zotu1232	1	0	1	1	1	0	0	17	1	1	3	93	1	1	0	0	0	0	0	0	0	0	0	0	0	0	0	0	0	0	0	0	0	0	0	0
Eukaryota	Chlorophyta	Mamiellophyceae	Mamiellales	dropped	dropped	dropped	Zotu1460	0	0	1	0	65	0	1	7	0	2	2	3	8	0	0	3	0	1	0	0	0	0	0	0	0	0	0	0	0	0	0	0	0	0	0	0
Eukaryota	Ciliophora	Oligohymenophorea	Sessilida	Vorticellidae	Vorticella	Vorticella sp. 23 PS-2013	Zotu832	0	0	0	0	0	69	0	0	0	0	0	0	0	0	0	0	0	0	0	0	0	0	0	0	0	0	0	0	0	0	0	0	0	0	0	0
Eukaryota	Ciliophora	Spirotrichea	Tintinnida	Codonellopsidae	Laackmanniella	Laackmanniella prolongata	Zotu1062	1	0	0	0	0	0	75	8	30	0	0	1	0	0	0	0	0	0	0	0	0	0	0	0	0	0	0	0	0	0	0	0	0	0	0	0
Eukaryota	Cnidaria	Anthozoa	Alcyonacea	Alcyoniidae	Sarcophyton	Sarcophyton auritum	Zotu1004	0	0	0	0	0	0	0	0	0	0	0	0	0	0	0	0	0	0	199	0	0	0	0	0	0	0	0	0	0	0	0	0	0	0	0	0
Eukaryota	Cnidaria	Anthozoa	Alcyonacea	Alcyoniidae	Sinularia	Sinularia polydactyla	Zotu257	0	0	0	0	0	0	0	0	0	0	0	0	0	0	0	0	0	0	0	0	0	0	0	0	1045	0	0	33	0	8	0	0	0	0	0	0
Eukaryota	Cnidaria	Anthozoa	Alcyonacea	Clavulariidae	Pachyclavularia	Pachyclavularia sp. I001	Zotu11	0	0	0	0	0	0	0	0	0	0	0	0	1	0	31	0	0	2	5	38336	0	0	0	0	0	0	5	47	0	32	0	0	0	0	0	0
Eukaryota	Cnidaria	Anthozoa	Helioporacea	Helioporidae	Heliopora	Heliopora sp. 1 NGW-2018	Zotu394	0	0	0	0	0	0	0	0	0	0	0	0	0	23	0	50	0	607	0	0	0	0	0	0	0	0	0	0	0	0	0	0	0	0	0	0
Eukaryota	Cnidaria	Anthozoa	Helioporacea	Lithotelestidae	Nanipora	dropped	Zotu125	0	0	0	0	1	0	0	0	0	0	0	0	0	0	2637	1534	0	0	0	15	0	0	0	0	0	0	0	0	0	0	0	6	13	0	3	0
Eukaryota	Cnidaria	Anthozoa	Scleractinia	Acroporidae	Montipora	dropped	Zotu53	908	48	636	1949	379	0	0	0	0	0	1	2	209	0	0	0	0	325	0	0	0	0	0	0	0	0	0	1	0	0	0	284	848	3968	0	0
Eukaryota	Cnidaria	Anthozoa	Scleractinia	Acroporidae	Montipora	dropped	Zotu100	0	0	0	0	192	0	0	0	0	1	1	2964	0	0	0	0	0	0	0	0	0	0	0	0	0	0	0	0	0	0	41	0	0	0	0	0
Eukaryota	Cnidaria	Anthozoa	Scleractinia	Acroporidae	Montipora	dropped	Zotu153	122	14	15	14	129	0	0	0	0	1	0	0	0	0	0	0	0	13	0	0	0	0	0	0	0	0	0	0	0	0	1	5490	0	17	6	0
Eukaryota	Cnidaria	Anthozoa	Scleractinia	Acroporidae	Montipora	dropped	Zotu223	640	69	176	0	169	0	0	0	0	3	0	0	0	0	0	0	0	32	0	0	0	0	0	0	0	0	0	0	0	0	0	392	0	2	2	30
Eukaryota	Cnidaria	Anthozoa	Scleractinia	Acroporidae	Montipora	dropped	Zotu227	56	10	5	5	39	0	0	0	0	0	0	1	0	0	0	0	0	12	0	0	0	0	0	0	0	0	0	0	0	0	0	2261	0	21	0	0
Eukaryota	Cnidaria	Anthozoa	Scleractinia	Acroporidae	Montipora	dropped	Zotu240	288	6	68	209	96	0	0	0	0	1	0	1	0	0	0	0	0	27	0	0	0	0	0	0	0	27	0	91	0	0	0	1693	27	551	8	0
Eukaryota	Cnidaria	Anthozoa	Scleractinia	Acroporidae	Montipora	dropped	Zotu262	277	0	0	226	0	0	0	0	0	0	0	0	139	0	0	0	0	4	0	0	0	0	0	0	0	0	0	0	0	0	0	2	2	457	0	0
Eukaryota	Cnidaria	Anthozoa	Scleractinia	Acroporidae	Montipora	dropped	Zotu443	0	0	21	0	0	0	0	0	0	0	0	0	0	0	0	0	0	45	0	0	0	0	0	0	0	0	0	0	0	0	0	1	0	285	0	0
Eukaryota	Cnidaria	Anthozoa	Scleractinia	Acroporidae	Montipora	dropped	Zotu501	0	0	0	129	0	0	0	0	0	0	0	0	0	0	0	0	0	0	0	0	0	0	0	0	1	2	0	2	0	1	0	1	3	46	0	0
Eukaryota	Cnidaria	Anthozoa	Scleractinia	Acroporidae	Montipora	dropped	Zotu607	235	0	0	0	0	0	0	0	0	0	0	0	0	5	0	0	0	0	0	0	0	0	0	0	0	5	1	52	0	0	0	0	0	0	0	0
Eukaryota	Cnidaria	Anthozoa	Scleractinia	Acroporidae	Montipora	dropped	Zotu668	65	5	17	15	66	0	0	0	0	1	0	0	4	0	0	0	0	23	0	0	1	0	0	0	0	3	5	0	0	0	0	121	4	625	0	0
Eukaryota	Cnidaria	Anthozoa	Scleractinia	Acroporidae	Montipora	dropped	Zotu780	125	0	13	33	0	0	0	0	0	0	0	0	0	0	0	0	0	39	0	0	0	0	0	0	0	1	0	0	0	1	0	84	6	246	0	0
Eukaryota	Cnidaria	Anthozoa	Scleractinia	Acroporidae	Montipora	dropped	Zotu1149	0	0	0	0	0	0	0	0	0	0	0	0	0	0	0	0	0	0	0	0	0	0	0	0	0	0	0	0	0	2	0	0	0	0	0	0
Eukaryota	Cnidaria	Anthozoa	Scleractinia	Acroporidae	Montipora	dropped	Zotu1251	1	0	0	0	0	0	0	0	0	0	0	0	0	0	0	0	0	0	0	0	0	0	0	0	28	0	0	0	0	0	0	0	0	1	0	0
Eukaryota	Cnidaria	Anthozoa	Scleractinia	Acroporidae	Montipora	dropped	Zotu1328	9	0	3	11	3	0	0	0	0	0	0	0	0	0	0	0	0	10	0	0	0	0	0	18	0	0	0	29	0	9	0	43	1	1	0	0
Eukaryota	Cnidaria	Anthozoa	Scleractinia	Acroporidae	Montipora	dropped	Zotu1589	0	0	3	1	0	0	0	0	0	0	0	0	0	0	0	0	0	0	0	0	0	0	0	0	0	0	0	0	0	0	0	15	2	39	1	0
Eukaryota	Cnidaria	Anthozoa	Scleractinia	Acroporidae	Montipora	Montipora dilatata	Zotu201	82	713	124	121	1	0	0	0	0	0	0	15	2	0	0	0	0	22	0	0	0	0	0	0	7	0	0	7	0	0	0	77	269	1848	0	0
Eukaryota	Cnidaria	Anthozoa	Scleractinia	Acroporidae	Montipora	Montipora dilatata	Zotu376	12	0	4	104	0	0	0	0	0	0	0	0	0	0	0	0	0	4	0	0	0	0	0	0	0	0	0	0	0	0	0	0	0	544	0	0
Eukaryota	Cnidaria	Anthozoa	Scleractinia	Acroporidae	Montipora	Montipora dilatata	Zotu662	1	0	6	55	0	0	0	0	0	0	0	34	2	0	0	0	0	7	0	0	0	0	0	0	0	0	0	0	0	0	0	1	55	1	0	0
Eukaryota	Cnidaria	Anthozoa	Scleractinia	Acroporidae	Montipora	Montipora flabellata	Zotu674	7	0	10	14	0	0	0	0	0	0	0	0	0	0	0	0	0	1	0	0	0	0	0	0	0	0	0	0	0	2	0	4	0	175	0	0
Eukaryota	Cnidaria	Anthozoa	Scleractinia	Acroporidae	Montipora	Montipora fragilis	Zotu361	289	1	142	15	58	0	0	0	0	1	0	0	0	0	0	0	0	270	0	0	0	0	0	0	0	0	0	1	0	0	0	2	0	178	0	0
Eukaryota	Cnidaria	Anthozoa	Scleractinia	Acroporidae	Montipora	Montipora fragilis	Zotu411	0	0	0	0	0	0	0	0	0	0	0	0	0	0	0	0	0	0	0	0	0	0	0	0	0	0	0	0	0	0	0	0	0	499	0	4
Eukaryota	Cnidaria	Anthozoa	Scleractinia	Acroporidae	Montipora	Montipora gaimardi	Zotu21	0	0	13	18	0	0	0	0	0	0	0	0	0	0	0	0	0	52	0	0	0	1	0	0	0	0	0	0	0	1	4	30877	907	1	0	0
Eukaryota	Cnidaria	Anthozoa	Scleractinia	Acroporidae	Montipora	Montipora gaimardi	Zotu917	0	0	0	0	0	0	0	0	0	0	0	0	0	11	0	0	0	0	0	0	0	0	0	0	0	0	0	0	0	0	0	0	0	0	0	0
Eukaryota	Cnidaria	Anthozoa	Scleractinia	Acroporidae	Montipora	Montipora mollis	Zotu1903	5	0	1	2	0	0	0	0	0	0	0	1	0	0	0	0	0	0	0	0	0	0	0	0	0	0	0	0	0	0	0	0	1	5	1	0
Eukaryota	Cnidaria	Anthozoa	Scleractinia	Acroporidae	Montipora	Montipora sp. DM19	Zotu315	161	0	143	216	288	0	0	0	0	0	0	0	0	0	0	0	0	35	0	0	0	0	0	0	0	4	0	0	0	0	0	101	6	6	9	10
Eukaryota	Cnidaria	Anthozoa	Scleractinia	Acroporidae	Montipora	Montipora truncata	Zotu189	109	0	148	313	666	0	0	0	0	3	0	0	71	0	0	0	0	46	0	0	0	0	0	0	0	0	0	0	0	0	0	112	0	1	0	0
Eukaryota	Cnidaria	Anthozoa	Scleractinia	Acroporidae	Montipora	Montipora truncata	Zotu253	5	0	7	237	0	0	0	0	0	0	0	710	0	0	0	0	0	1	0	0	0	0	0	0	0	0	0	0	0	0	0	113	3	1	0	0
Eukaryota	Cnidaria	Anthozoa	Scleractinia	Acroporidae	Montipora	Montipora truncata	Zotu337	251	126	127	98	73	0	0	0	0	0	0	0	0	0	0	0	0	36	0	0	0	0	0	0	0	0	0	0	0	0	0	101	1	426	0	0
Eukaryota	Cnidaria	Anthozoa	Scleractinia	Acroporidae	Montipora	Montipora truncata	Zotu373	15	0	35	125	0	0	0	0	0	0	0	0	0	0	0	0	0	6	0	0	1	0	0	0	0	0	0	0	0	0	0	1	18	466	0	0
Eukaryota	Cnidaria	Anthozoa	Scleractinia	Acroporidae	Montipora	Montipora truncata	Zotu403	173	0	228	151	1	0	0	0	0	0	0	2	0	0	0	0	0	53	0	0	0	0	0	0	0	0	0	0	0	0	0	12	19	175	1	0
Eukaryota	Cnidaria	Anthozoa	Scleractinia	Acroporidae	Montipora	Montipora truncata	Zotu472	249	0	38	261	0	0	0	0	0	0	0	0	0	0	0	0	0	49	0	0	0	0	0	0	0	0	0	0	0	0	0	54	17	98	0	0
Eukaryota	Cnidaria	Anthozoa	Scleractinia	Acroporidae	Montipora	Montipora truncata	Zotu783	48	0	6	18	0	0	0	0	0	0	0	0	0	0	0	0	0	7	0	0	0	0	0	0	0	0	0	0	0	0	0	21	17	26	0	0
Eukaryota	Cnidaria	Anthozoa	Scleractinia	Acroporidae	Montipora	Montipora venosa	Zotu341	3	0	0	0	0	0	0	0	0	0	0	0	0	0	0	0	0	2	0	0	560	0	0	0	0	0	0	0	0	0	0	0	1	20	0	0
Eukaryota	Cnidaria	Anthozoa	Scleractinia	dropped	dropped	dropped	Zotu61	0	0	0	0	0	0	0	0	0	0	0	0	0	0	0	0	0	0	0	0	0	0	0	0	0	0	0	0	0	1	0	0	0	0	0	0
Eukaryota	Cnidaria	Anthozoa	Scleractinia	Fungiidae	dropped	dropped	Zotu54	0	0	0	0	0	0	0	1	0	0	0	0	0	115	0	4	170	354	0	0	0	0	0	0	0	0	0	0	0	0	0	0	0	0	0	0
Eukaryota	Cnidaria	Anthozoa	Scleractinia	Fungiidae	Lithophyllon	Lithophyllon scabra	Zotu13	0	0	0	0	0	0	0	0	0	0	0	0	0	0	0	0	0	1	0	0	0	0	0	0	0	0	0	0	0	0	0	0	0	0	4	0
Eukaryota	Cnidaria	Anthozoa	Scleractinia	Fungiidae		Fungiidae sp. YO-2019	Zotu58	0	0	0	0	0	0	0	0	0	0	0	0	0	0	0	1	25	35	0	0	0	0	0	0	0	0	0	0	0	0	0	0	0	0	0	0
Eukaryota	Cnidaria	Anthozoa	Scleractinia	Fungiidae		Fungiidae sp. YO-2019	Zotu94	0	0	0	0	0	0	0	0	0	0	0	0	0	0	0	0	4	26	0	0	0	0	0	0	0	0	0	0	0	0	0	0	0	0	0	0
Eukaryota	Cnidaria	Anthozoa	Scleractinia	Fungiidae		Fungiidae sp. YO-2019	Zotu106	0	0	0	0	0	0	0	0	0	0	0	0	0	3	0	0	2	6	0	0	0	0	0	0	0	0	0	0	0	0	0	0	0	0	0	0
Eukaryota	Cnidaria	Anthozoa	Scleractinia	Fungiidae		Fungiidae sp. YO-2019	Zotu162	0	0	0	0	0	0	0	0	0	0	0	0	0	0	0	0	0	4	0	0	0	0	0	0	0	0	0	0	0	0	0	0	0	0	0	0
Eukaryota	Cnidaria	Anthozoa	Scleractinia	Fungiidae		Fungiidae sp. YO-2019	Zotu238	0	0	0	0	0	0	0	0	0	0	0	0	0	0	0	26	0	0	0	0	0	0	0	0	0	0	0	0	0	0	0	0	0	0	0	0
Eukaryota	Cnidaria	Anthozoa	Scleractinia	Fungiidae		Fungiidae sp. YO-2019	Zotu324	0	0	0	0	0	0	0	0	0	0	0	0	0	134	0	0	0	17	0	0	0	0	0	0	0	0	0	0	0	0	0	0	0	0	0	0
Eukaryota	Cnidaria	Anthozoa	Scleractinia	Lobophylliidae	Acanthastrea	Acanthastrea echinata	Zotu1665	0	0	0	0	0	0	0	0	0	0	0	0	0	0	0	0	0	0	0	0	31	0	0	0	0	0	0	0	0	0	0	0	0	0	0	0
Eukaryota	Cnidaria	Anthozoa	Scleractinia	Lobophylliidae	Echinophyllia	dropped	Zotu928	0	0	0	0	0	0	0	0	0	0	0	0	0	0	0	0	0	88	0	0	0	0	0	0	0	0	0	0	0	0	0	0	0	0	0	0
Eukaryota	Cnidaria	Anthozoa	Scleractinia	Merulinidae	Goniastrea	Goniastrea edwardsi	Zotu354	0	0	0	0	713	0	0	0	0	2	0	0	0	0	0	0	0	1	0	0	0	0	0	0	0	0	0	0	0	0	0	0	0	0	0	0
Eukaryota	Cnidaria	Anthozoa	Scleractinia	Merulinidae	Goniastrea	Goniastrea edwardsi	Zotu640	5	0	0	0	0	0	0	0	0	0	0	0	0	0	0	0	0	0	0	0	0	0	0	0	0	0	0	0	0	0	0	0	0	0	0	0
Eukaryota	Cnidaria	Anthozoa	Scleractinia	Merulinidae	Goniastrea	Goniastrea edwardsi	Zotu936	0	0	5	0	0	0	0	0	0	0	0	0	0	0	0	0	0	4	0	0	0	0	0	0	0	0	0	0	0	0	0	0	0	0	0	0
Eukaryota	Cnidaria	Anthozoa	Scleractinia	Merulinidae	Paragoniastrea	Paragoniastrea australensis	Zotu553	0	0	0	0	0	0	0	0	0	0	0	0	260	0	5	0	0	4	0	0	0	0	0	0	0	0	0	0	0	0	0	0	0	0	0	0
Eukaryota	Cnidaria	Anthozoa	Scleractinia	Pocilloporidae	Pocillopora	dropped	Zotu880	0	0	0	0	0	0	0	0	0	0	0	0	0	0	0	0	0	0	0	0	0	0	0	0	9	221	29	7	53	15	0	0	0	0	0	0
Eukaryota	Cnidaria	Anthozoa	Scleractinia	Pocilloporidae	Pocillopora	dropped	Zotu1116	0	0	0	0	0	0	0	0	0	0	0	0	0	0	0	1	0	2	0	0	0	0	0	0	6	20	28	18	128	4	0	0	0	0	0	0
Eukaryota	Cnidaria	Anthozoa	Scleractinia	Poritidae	dropped	dropped	Zotu15	1157	885	1251	1152	1058	0	0	0	0	5	0	0	0	75	203	9	96	34	0	1	0	0	0	0	0	0	0	0	0	0	0	0	0	0	0	0
Eukaryota	Cnidaria	Anthozoa	Scleractinia	Poritidae	dropped	dropped	Zotu18	1141	17173	68	454	1416	0	0	0	0	8	0	0	5	36	220	104	131	7	0	3	0	0	0	0	0	0	0	0	0	1	0	0	0	0	1	0
Eukaryota	Cnidaria	Anthozoa	Scleractinia	Poritidae	dropped	dropped	Zotu19	149	1444	77	475	38	0	0	275	0	1	0	0	0	1	4	7	11	0	0	0	0	0	0	0	0	0	0	0	0	6	0	0	0	0	0	0
Eukaryota	Cnidaria	Anthozoa	Scleractinia	Poritidae	dropped	dropped	Zotu50	437	193	97	49	58	0	0	0	0	0	0	0	0	10	17	53	0	0	0	1	0	0	0	0	2	0	13	0	0	0	0	0	458	0	0	0
Eukaryota	Cnidaria	Anthozoa	Scleractinia	Poritidae	dropped	dropped	Zotu77	463	1831	1670	3517	2	0	0	0	0	0	0	0	0	27	49	1	3	0	0	0	0	0	0	0	2	0	6	1	1	0	0	0	1	1	3	0
Eukaryota	Cnidaria	Anthozoa	Scleractinia	Poritidae	dropped	dropped	Zotu308	0	0	0	0	0	0	0	0	0	0	0	0	0	22	0	0	0	0	0	0	0	0	0	0	13	0	0	28	0	0	0	0	0	0	0	0
Eukaryota	Cnidaria	Anthozoa	Scleractinia	Poritidae	Goniopora	dropped	Zotu71	0	0	0	0	0	0	0	1	0	0	0	0	832	2015	7203	6793	1072	561	0	31	0	0	0	0	0	0	0	0	0	0	0	0	0	0	0	0
Eukaryota	Cnidaria	Anthozoa	Scleractinia	Poritidae	Goniopora	dropped	Zotu95	0	0	0	0	0	0	0	1	0	0	0	1	3936	7245	13043	10319	4346	1824	0	73	0	0	0	0	0	0	0	0	0	0	0	0	0	0	0	0
Eukaryota	Cnidaria	Anthozoa	Scleractinia	Poritidae	Goniopora	dropped	Zotu103	0	0	0	0	0	0	0	0	0	0	0	0	2583	1053	811	570	805	290	0	5	0	0	0	0	0	0	0	0	0	0	0	0	0	0	0	0
Eukaryota	Cnidaria	Anthozoa	Scleractinia	Poritidae	Goniopora	dropped	Zotu241	124	0	20	1112	1641	0	0	0	0	8	0	0	256	239	541	537	57	368	0	1	0	0	0	0	0	0	0	0	0	0	0	0	30	0	0	0
Eukaryota	Cnidaria	Anthozoa	Scleractinia	Poritidae	Goniopora	dropped	Zotu574	5	0	1	67	65	0	0	0	0	0	0	0	13	6	19	28	2	14	0	1	0	0	0	0	0	0	0	0	0	0	0	0	1	0	1	0
Eukaryota	Cnidaria	Anthozoa	Scleractinia	Poritidae	Goniopora	Goniopora cf. fruticosa YFK-2014	Zotu80	0	0	0	0	0	1	0	0	0	0	0	0	1135	2964	3595	5422	1396	666	0	15	0	0	0	0	0	0	0	0	0	0	0	0	0	0	0	0
Eukaryota	Cnidaria	Anthozoa	Scleractinia	Poritidae	Porites	dropped	Zotu36	187	0	1757	2	0	0	0	267	0	0	0	86	14	140	249	306	152	17	0	0	0	0	0	0	0	0	0	1	0	0	0	0	109	0	1	8
Eukaryota	Cnidaria	Anthozoa	Scleractinia	Poritidae	Porites	dropped	Zotu37	249	60	186	313	195	0	0	0	0	0	0	0	8	19	142	53	6	3	0	2	0	0	0	0	1	0	28	0	108	0	26	0	133	2	40	74
Eukaryota	Cnidaria	Anthozoa	Scleractinia	Poritidae	Porites	dropped	Zotu40	1615	2187	168	1842	0	0	0	0	0	0	0	0	77	11	229	0	109	8	0	4	0	0	0	0	0	0	0	0	0	0	0	4	4	0	0	0
Eukaryota	Cnidaria	Anthozoa	Scleractinia	Poritidae	Porites	dropped	Zotu44	311	324	1356	1475	30	0	0	0	0	0	0	20	0	43	97	172	43	5	0	1	0	0	0	0	0	0	0	0	0	0	1	0	218	0	215	0
Eukaryota	Cnidaria	Anthozoa	Scleractinia	Poritidae	Porites	dropped	Zotu89	219	348	236	192	44	0	0	1	0	0	0	0	0	14	418	4	0	0	0	0	0	0	0	0	0	0	0	0	0	1	3	0	847	0	101	0
Eukaryota	Cnidaria	Anthozoa	Scleractinia	Poritidae	Porites	dropped	Zotu194	0	0	1	2	0	0	0	0	0	0	0	0	0	0	0	0	0	0	0	0	0	0	0	0	0	0	0	0	0	0	0	0	0	0	0	0
Eukaryota	Cnidaria	Anthozoa	Scleractinia	Poritidae	Porites	dropped	Zotu750	38	0	24	67	4	0	0	0	0	0	0	0	0	4	11	46	0	4	0	0	0	0	0	0	0	1	0	87	0	0	2	0	0	0	0	0
Eukaryota	Cnidaria	Anthozoa	Scleractinia	Poritidae	Porites	dropped	Zotu932	0	0	0	1	1	0	0	0	0	0	0	0	0	1	0	0	0	0	0	0	0	0	0	0	0	1	0	105	0	19	0	0	0	0	0	0
Eukaryota	Cnidaria	Anthozoa	Scleractinia	Poritidae	Porites	Porites lobata	Zotu63	322	0	313	231	8	0	0	761	0	0	0	5	53	37	210	49	2	1	0	1	0	0	0	0	15	0	0	0	0	5	3	0	1318	0	138	7
Eukaryota	Cnidaria	Anthozoa	Scleractinia	Poritidae	Porites	Porites lobata	Zotu143	144	0	143	235	21	0	0	0	0	0	0	0	0	44	112	107	0	63	0	0	0	0	0	0	33	0	0	17	210	0	68	0	7	13	28	35
Eukaryota	Cnidaria	Anthozoa	Scleractinia	Poritidae	Porites	Porites lobata	Zotu161	172	21	88	47	305	0	0	0	0	0	0	0	0	13	28	47	0	3	0	1	0	0	0	0	65	0	0	3	0	6	6	0	1278	5	14	1
Eukaryota	Cnidaria	Anthozoa	Scleractinia		Leptastrea	Leptastrea pruinosa	Zotu20	0	0	0	0	0	0	0	0	0	0	0	0	0	0	0	0	0	0	0	0	0	0	0	0	0	0	0	0	180	1	0	0	0	0	0	0
Eukaryota	Cnidaria	Anthozoa	Scleractinia		Leptastrea	Leptastrea pruinosa	Zotu59	0	0	0	0	0	0	0	0	0	0	0	0	0	0	0	0	0	0	0	0	0	0	0	0	0	0	0	0	117	0	0	0	0	0	0	0
Eukaryota	Cnidaria	Anthozoa	Zoantharia	Zoanthidae	Zoanthus	Zoanthus sansibaricus	Zotu1119	0	0	53	0	0	0	0	0	0	0	0	0	0	0	0	0	0	0	0	0	0	0	0	0	0	0	0	0	0	0	0	0	0	0	0	0
Eukaryota	Porifera	Demospongiae	Clionaida	Placospongiidae	Placospongia	dropped	Zotu295	0	0	1	6	1002	0	0	0	0	4	0	0	141	28	0	50	0	80	0	0	0	0	0	0	1	0	0	0	0	0	0	0	0	0	0	2
Eukaryota	Porifera	Demospongiae	Dictyoceratida	Dysideidae	Dysidea	Dysidea sp. 2 LNP-2018	Zotu137	510	164	255	520	0	0	714	3014	3287	5	911	964	478	103	124	75	15	49	0	0	1030	0	0	0	40	5	116	81	1	8	248	11	32	31	36	79
Eukaryota	Porifera	Demospongiae	Dictyoceratida	Dysideidae	Dysidea	Dysidea sp. 2 LNP-2018	Zotu307	0	0	0	0	0	0	11	18	9	0	1372	1	5	0	0	13	0	0	0	0	2	0	0	0	0	0	0	0	0	0	2	0	0	1	0	0
Eukaryota	Porifera	Demospongiae	Suberitida	Halichondriidae	Hymeniacidon	Hymeniacidon flavia	Zotu566	0	0	3	240	0	0	0	0	0	0	0	0	0	0	0	0	0	0	0	0	0	0	0	0	0	0	0	0	0	0	0	0	0	0	0	0
Eukaryota		dropped	dropped	dropped	dropped	dropped	Zotu145	0	0	0	0	0	0	0	997	0	0	0	0	0	2	3	61	0	0	0	0	0	0	0	0	1779	1136	291	2561	562	14	0	0	0	0	0	0
Eukaryota			Sticholonchida	Sticholonchidae	Sticholonche	Sticholonche sp. JB-2011	Zotu289	0	0	0	0	0	0	0	0	5	0	0	0	168	1	0	0	0	0	0	0	54	0	0	0	421	133	64	1015	216	2	0	0	0	0	0	0
Eukaryota			Sticholonchida	Sticholonchidae	Sticholonche	Sticholonche sp. JB-2011	Zotu462	0	0	0	0	0	0	0	1	0	0	0	0	4	0	1	0	0	0	0	0	0	0	0	0	126	107	52	276	144	3	0	0	0	0	0	0
Eukaryota						uncultured eukaryote	Zotu25	0	0	0	0	0	0	0	0	0	0	0	0	0	0	0	0	0	0	0	0	0	0	0	0	13713	11386	3	0	0	321	0	0	0	0	0	0
Eukaryota						uncultured eukaryote	Zotu879	0	0	0	0	0	0	0	0	0	0	0	0	0	0	0	0	0	0	0	0	204	0	0	0	0	0	0	44	0	0	0	0	0	0	0	0
Eukaryota						uncultured eukaryote	Zotu1534	0	0	0	0	0	0	0	0	0	0	0	0	0	0	0	0	0	0	0	0	0	0	0	0	0	0	0	42	0	0	0	0	0	0	0	0
Eukaryota						uncultured fungus	Zotu1740	0	0	0	0	0	0	0	0	0	0	0	0	0	0	0	0	0	0	0	0	0	0	0	0	0	0	0	0	0	0	25	0	0	0	0	0

## Sheet: ITS2_ZOTUS_CLEAN_GUT
S1 Appendix. 18Suni assay and ITS2 assay ZOTU assignment based on DNA isolated from seawater and oval butterflyfish (Chaetodon lunulatus) gut samples collected at 10 sites from Dongsha Atoll (Taiwan) in the South China Sea. The numbers in cells are the number of unique reads per ZOTU. BLANK4 refers to one of the extraction blanks that produced reads, indicated by the highlighted rows in yellow, w…
domain	phylum	class	order	family	genus	species	ZOTU	Clu1a	Clu2a	Clu3a	Clu4a	Clu5a	Clu6a	Clu7a	Clu8a	Clu9a	Clu10a	Clu11a	Clu12a	Clu13a	Clu14a	Clu15a	Clu16a	Clu17a	Clu18a	Clu19a	Clu20a	Clu21a	Clu22a	Clu23a	Clu24a	Clu25a	Clu26a	Clu27a	Clu28b	Clu29b	Clu30b	Clu32b	Clu33b	Clu34b	Clu35b	Clu36b	Clu37b	Clu38b	Clu39b	Clu40b
Eukaryota	Cnidaria	Anthozoa	Scleractinia	Acroporidae	Montipora	dropped	Zotu53	1	2482	3	0	0	0	0	0	0	0	0	3	0	26	11	3	26	8	0	0	0	0	0	0	0	0	0	0	0	0	0	0	0	0	1	2	4	1	0
Eukaryota	Cnidaria	Anthozoa	Scleractinia	Acroporidae	Montipora	dropped	Zotu100	0	3	0	0	0	0	0	0	0	0	0	0	0	1	0	0	0	0	0	0	0	0	0	0	0	0	0	0	0	0	0	0	0	0	0	0	0	0	0
Eukaryota	Cnidaria	Anthozoa	Scleractinia	Acroporidae	Montipora	dropped	Zotu153	0	14	1	0	0	0	0	0	0	0	0	0	0	0	0	0	1	0	0	0	0	0	0	0	0	0	0	0	0	0	0	0	0	0	0	0	0	0	0
Eukaryota	Cnidaria	Anthozoa	Scleractinia	Acroporidae	Montipora	dropped	Zotu223	0	44	6	0	0	0	0	0	0	0	0	0	0	0	0	1	1	0	0	0	0	0	0	0	0	0	0	0	0	0	0	0	0	0	0	0	0	0	0
Eukaryota	Cnidaria	Anthozoa	Scleractinia	Acroporidae	Montipora	dropped	Zotu227	0	3	0	0	0	0	0	0	0	0	0	0	0	0	0	0	2	0	0	0	0	0	0	0	0	0	0	0	0	0	0	0	0	0	0	0	0	0	0
Eukaryota	Cnidaria	Anthozoa	Scleractinia	Acroporidae	Montipora	dropped	Zotu240	0	205	0	0	0	0	0	0	0	3	0	13	0	47	0	2	12	1	0	0	0	0	0	0	0	0	0	0	0	0	0	0	0	0	60	12	1	0	0
Eukaryota	Cnidaria	Anthozoa	Scleractinia	Acroporidae	Montipora	dropped	Zotu262	2	189	0	0	0	0	0	0	0	0	0	13	0	103	68	3	10	22	8	0	0	0	0	0	0	0	0	0	0	0	0	0	0	0	0	3	5	0	0
Eukaryota	Cnidaria	Anthozoa	Scleractinia	Acroporidae	Montipora	dropped	Zotu443	2	12	0	0	0	0	0	0	0	0	0	0	0	0	0	0	1	0	0	0	0	0	0	0	0	0	0	0	0	0	0	0	0	0	0	0	0	0	0
Eukaryota	Cnidaria	Anthozoa	Scleractinia	Acroporidae	Montipora	dropped	Zotu501	0	57	0	0	0	0	0	0	0	0	0	0	0	28	137	0	6	2	0	0	0	0	0	0	0	0	0	0	0	0	0	0	0	0	0	0	5	9	1
Eukaryota	Cnidaria	Anthozoa	Scleractinia	Acroporidae	Montipora	dropped	Zotu607	1	6	0	0	1	0	0	0	0	0	0	1	0	10	0	0	1	1	1	0	0	0	0	0	0	0	0	0	0	0	0	0	0	0	0	33	0	0	1
Eukaryota	Cnidaria	Anthozoa	Scleractinia	Acroporidae	Montipora	dropped	Zotu668	1	115	0	0	0	0	0	0	0	0	0	3	0	24	30	0	2	2	0	0	0	0	0	0	0	0	0	0	0	0	0	0	0	0	0	0	0	0	0
Eukaryota	Cnidaria	Anthozoa	Scleractinia	Acroporidae	Montipora	dropped	Zotu780	0	68	0	0	0	0	0	0	0	0	0	0	0	20	10	1	7	0	1	0	0	0	0	0	0	0	0	0	0	0	0	0	0	0	0	0	7	0	1
Eukaryota	Cnidaria	Anthozoa	Scleractinia	Acroporidae	Montipora	dropped	Zotu1149	0	0	0	0	0	0	0	0	0	0	0	0	0	0	0	0	0	0	0	0	0	0	0	0	0	0	0	0	0	0	0	0	0	0	0	0	7	37	0
Eukaryota	Cnidaria	Anthozoa	Scleractinia	Acroporidae	Montipora	dropped	Zotu1251	1	4	0	0	0	0	0	0	0	0	0	0	0	12	18	0	0	0	0	0	0	0	0	0	0	0	0	0	0	0	0	0	0	0	0	0	0	0	0
Eukaryota	Cnidaria	Anthozoa	Scleractinia	Acroporidae	Montipora	dropped	Zotu1328	1	10	3	0	0	0	0	0	0	0	0	1	0	14	0	0	3	0	0	0	0	0	0	0	0	0	0	0	0	4	0	0	0	0	0	6	0	0	0
Eukaryota	Cnidaria	Anthozoa	Scleractinia	Acroporidae	Montipora	dropped	Zotu1589	0	17	0	0	0	0	0	0	0	0	0	0	0	2	1	0	1	0	0	0	0	0	0	0	0	0	0	0	0	0	0	0	0	0	0	1	0	0	0
Eukaryota	Cnidaria	Anthozoa	Scleractinia	Acroporidae	Montipora	dropped	Zotu1642	0	0	0	0	0	0	0	0	0	3	0	0	0	0	0	0	0	0	0	0	0	0	0	0	0	0	0	0	0	0	16	0	0	0	0	0	0	0	0
Eukaryota	Cnidaria	Anthozoa	Scleractinia	Acroporidae	Montipora	Montipora dilatata	Zotu201	3	480	1	0	0	0	2	0	0	14	0	2	0	39	17	3	34	5	0	0	0	0	0	0	0	0	0	0	0	0	0	0	0	0	0	5	9	1	0
Eukaryota	Cnidaria	Anthozoa	Scleractinia	Acroporidae	Montipora	Montipora dilatata	Zotu376	1	3	0	0	0	0	0	0	0	0	0	0	0	2	0	0	0	0	0	0	0	0	0	0	0	0	0	0	0	0	0	0	0	0	0	0	0	0	0
Eukaryota	Cnidaria	Anthozoa	Scleractinia	Acroporidae	Montipora	Montipora dilatata	Zotu662	1	116	0	0	0	0	0	0	0	0	0	0	0	2	0	0	0	0	0	0	0	0	0	0	0	0	0	0	0	0	0	0	0	0	0	1	0	0	0
Eukaryota	Cnidaria	Anthozoa	Scleractinia	Acroporidae	Montipora	Montipora flabellata	Zotu674	0	31	0	0	0	0	0	0	0	0	0	1	0	31	95	0	21	0	0	0	0	0	0	0	0	0	0	0	0	0	0	0	0	0	0	1	0	0	1
Eukaryota	Cnidaria	Anthozoa	Scleractinia	Acroporidae	Montipora	Montipora fragilis	Zotu361	0	11	2	0	0	0	0	0	0	0	0	0	0	2	0	0	9	0	0	0	0	0	0	0	0	0	0	0	0	0	0	0	0	0	0	1	0	0	0
Eukaryota	Cnidaria	Anthozoa	Scleractinia	Acroporidae	Montipora	Montipora gaimardi	Zotu21	1	2	0	0	0	0	0	0	0	0	0	0	0	69	0	0	4	4	0	0	0	0	0	0	0	0	0	0	0	36	0	0	0	13	0	63	0	0	0
Eukaryota	Cnidaria	Anthozoa	Scleractinia	Acroporidae	Montipora	Montipora gaimardi	Zotu917	0	0	0	0	0	0	0	0	0	0	0	0	0	0	0	1	4	0	0	0	0	0	0	0	0	0	0	0	0	0	0	0	0	102	0	0	0	0	0
Eukaryota	Cnidaria	Anthozoa	Scleractinia	Acroporidae	Montipora	Montipora mollis	Zotu1903	0	32	0	0	0	0	0	0	0	2	0	0	0	6	28	5	5	1	4	0	0	0	0	0	0	0	0	0	0	0	0	0	0	0	0	0	0	0	0
Eukaryota	Cnidaria	Anthozoa	Scleractinia	Acroporidae	Montipora	Montipora sp. DM19	Zotu315	1	71	7	0	0	0	0	0	0	3	0	2	0	5	0	2	6	1	0	1	0	0	0	0	0	0	0	0	0	1	0	0	0	0	0	1	0	0	0
Eukaryota	Cnidaria	Anthozoa	Scleractinia	Acroporidae	Montipora	Montipora truncata	Zotu189	0	389	0	0	0	0	0	0	0	0	0	0	0	1	0	0	3	0	0	0	0	0	0	0	0	0	0	0	0	0	0	0	0	0	0	1	1	1	0
Eukaryota	Cnidaria	Anthozoa	Scleractinia	Acroporidae	Montipora	Montipora truncata	Zotu253	9	183	0	0	0	0	0	1	0	1	0	0	0	11	0	2	0	1	0	0	0	0	0	0	0	0	0	0	0	0	0	0	0	0	0	0	1	0	0
Eukaryota	Cnidaria	Anthozoa	Scleractinia	Acroporidae	Montipora	Montipora truncata	Zotu337	0	258	0	0	0	0	0	0	0	0	0	2	0	9	0	1	8	2	0	0	0	0	0	0	0	0	0	0	0	0	0	0	0	0	0	0	0	0	0
Eukaryota	Cnidaria	Anthozoa	Scleractinia	Acroporidae	Montipora	Montipora truncata	Zotu373	1	57	0	0	0	0	0	0	0	0	0	0	0	1	7	0	0	0	0	0	0	0	0	0	0	0	0	0	0	0	0	0	0	0	0	0	0	1	0
Eukaryota	Cnidaria	Anthozoa	Scleractinia	Acroporidae	Montipora	Montipora truncata	Zotu403	6	138	0	0	0	0	0	0	0	0	0	0	0	8	3	0	24	2	0	0	0	0	0	0	0	0	0	0	0	0	0	0	0	0	0	0	0	0	0
Eukaryota	Cnidaria	Anthozoa	Scleractinia	Acroporidae	Montipora	Montipora truncata	Zotu472	0	265	0	0	0	0	0	0	0	0	0	0	0	8	4	1	0	0	0	0	0	0	0	0	0	0	0	0	0	0	0	0	0	0	0	4	1	0	0
Eukaryota	Cnidaria	Anthozoa	Scleractinia	Acroporidae	Montipora	Montipora truncata	Zotu783	0	82	0	0	0	0	0	0	0	2	0	0	0	37	30	0	2	2	0	0	0	0	0	0	0	0	0	0	0	0	0	0	0	0	0	9	4	0	1
Eukaryota	Cnidaria	Anthozoa	Scleractinia	Acroporidae	Montipora	Montipora venosa	Zotu341	0	10	0	0	0	0	0	0	0	2	0	0	0	4	27	0	0	0	0	0	0	0	0	0	0	0	0	0	0	0	0	0	0	0	0	0	1	0	0
Eukaryota	Cnidaria	Anthozoa	Scleractinia	Agariciidae	Pavona	Pavona cactus	Zotu498	0	0	1	375	0	12	0	0	3	0	1	0	0	0	0	0	0	0	1	0	0	0	0	0	0	0	0	0	0	0	0	0	0	0	0	0	0	0	0
Eukaryota	Cnidaria	Anthozoa	Scleractinia	Dendrophylliidae	Turbinaria	Turbinaria mesenterina	Zotu432	15	7	0	7	3	28	0	0	17	8	10	6	195	0	0	0	0	0	0	0	0	0	0	0	0	349	0	0	0	0	0	0	0	0	0	0	0	0	0
Eukaryota	Cnidaria	Anthozoa	Scleractinia	dropped	dropped	dropped	Zotu61	0	0	8	49	0	0	0	0	0	0	2	1	8	394	13757	0	0	0	0	0	0	0	0	0	0	2	0	0	0	34	0	0	1	6	0	0	0	0	0
Eukaryota	Cnidaria	Anthozoa	Scleractinia	Fungiidae	dropped	dropped	Zotu54	1	0	540	0	0	188	2851	223	557	7008	499	893	1590	0	0	1	0	1029	0	44	0	3	1278	5911	1497	235	3	0	0	0	0	0	0	0	18	0	0	0	0
Eukaryota	Cnidaria	Anthozoa	Scleractinia	Fungiidae	Lithophyllon	Lithophyllon scabra	Zotu13	29910	18007	11608	1174	4474	4306	5244	2629	1431	671	1798	29	149	1	0	0	0	2444	14	16	0	0	442	162	210	66	1	5	0	7	0	0	0	30	0	2	0	0	0
Eukaryota	Cnidaria	Anthozoa	Scleractinia	Fungiidae	Lithophyllon	Lithophyllon scabra	Zotu30	5486	15090	2942	249	399	52	79	756	217	55	130	0	14	2	0	0	0	390	0	0	0	0	4	20	1	1	0	21	33	0	0	0	0	11	0	0	0	0	0
Eukaryota	Cnidaria	Anthozoa	Scleractinia	Fungiidae	Lithophyllon	Lithophyllon scabra	Zotu158	763	21	2593	0	114	6	15	306	108	22	157	0	0	0	0	0	0	61	1	1	0	0	0	1	8	3	0	2	3	0	0	0	0	0	0	0	0	0	0
Eukaryota	Cnidaria	Anthozoa	Scleractinia	Fungiidae	Lithophyllon	Lithophyllon scabra	Zotu344	513	136	298	7	176	329	151	68	32	346	43	1	4	1	0	0	0	124	0	5	0	0	77	40	9	0	0	0	0	0	0	0	0	1	0	0	0	0	0
Eukaryota	Cnidaria	Anthozoa	Scleractinia	Fungiidae		Fungiidae sp. YO-2019	Zotu58	3	0	10	1	2	34	545	531	26	8309	180	135	303	0	0	11	0	356	0	467	0	19	124	3822	104	58	0	0	0	0	0	0	0	0	1	0	0	0	0
Eukaryota	Cnidaria	Anthozoa	Scleractinia	Fungiidae		Fungiidae sp. YO-2019	Zotu94	0	0	0	0	0	1	125	27	2	2783	10	115	39	0	0	1	0	48	0	10	0	4	316	1666	32	20	0	0	0	0	0	0	0	0	0	0	0	0	0
Eukaryota	Cnidaria	Anthozoa	Scleractinia	Fungiidae		Fungiidae sp. YO-2019	Zotu106	0	0	247	0	2	16	80	44	18	3740	60	32	130	1	0	0	0	185	0	23	0	0	14	1837	30	7	0	0	0	0	0	0	0	0	2	0	0	0	0
Eukaryota	Cnidaria	Anthozoa	Scleractinia	Fungiidae		Fungiidae sp. YO-2019	Zotu162	0	0	0	0	0	5	189	14	2	2103	4	109	12	0	0	0	0	17	0	1	0	10	683	122	74	14	0	0	0	0	0	0	0	0	0	0	0	0	0
Eukaryota	Cnidaria	Anthozoa	Scleractinia	Fungiidae		Fungiidae sp. YO-2019	Zotu238	0	0	0	0	0	0	105	0	0	1	0	1477	0	0	0	0	0	0	0	0	0	0	0	0	0	0	0	0	0	0	0	0	0	0	0	0	0	0	0
Eukaryota	Cnidaria	Anthozoa	Scleractinia	Fungiidae		Fungiidae sp. YO-2019	Zotu324	0	0	0	0	0	6	46	4	0	628	2	6	170	0	0	0	0	134	0	2	0	0	0	49	28	22	0	0	0	0	0	0	0	0	0	0	0	0	0
Eukaryota	Cnidaria	Anthozoa	Scleractinia	Lobophylliidae	Acanthastrea	Acanthastrea echinata	Zotu1665	0	0	0	0	0	0	0	0	0	0	0	0	0	0	1	0	0	0	0	0	0	0	0	0	0	0	0	0	0	0	0	0	0	0	0	0	0	0	1
Eukaryota	Cnidaria	Anthozoa	Scleractinia	Lobophylliidae	Acanthastrea	Acanthastrea hemprichii	Zotu1306	0	0	0	0	0	0	0	0	0	0	0	0	0	40	0	0	0	0	0	0	0	0	0	0	0	0	0	0	0	0	0	0	0	0	0	0	0	0	3
Eukaryota	Cnidaria	Anthozoa	Scleractinia	Merulinidae	Favites	Favites abdita	Zotu1776	0	0	0	0	0	0	0	0	0	0	0	0	0	26	9	0	0	0	0	0	0	0	0	0	0	0	0	0	0	0	0	0	0	0	0	0	0	0	4
Eukaryota	Cnidaria	Anthozoa	Scleractinia	Merulinidae	Goniastrea	Goniastrea edwardsi	Zotu354	0	0	3	4	0	0	2	1	0	1	6	96	0	0	21	1	6	8	763	0	0	0	0	0	0	1	0	0	0	0	0	1	0	0	0	7	0	24	8
Eukaryota	Cnidaria	Anthozoa	Scleractinia	Merulinidae	Goniastrea	Goniastrea edwardsi	Zotu524	0	0	0	0	0	0	1	0	0	1	9	338	0	0	0	3	28	0	429	0	0	0	0	14	0	1	0	0	2	0	0	0	0	0	0	5	0	3	0
Eukaryota	Cnidaria	Anthozoa	Scleractinia	Merulinidae	Goniastrea	Goniastrea edwardsi	Zotu640	1	0	2	1	0	0	4	0	3	5	13	34	2	0	0	1	12	4	468	0	0	0	1	0	0	0	0	0	0	0	0	0	0	0	0	0	0	0	0
Eukaryota	Cnidaria	Anthozoa	Scleractinia	Merulinidae	Goniastrea	Goniastrea edwardsi	Zotu936	0	3	0	0	0	0	0	0	1	2	17	27	1	0	1	6	2	5	119	0	0	0	3	0	6	0	0	0	0	0	0	3	0	0	0	0	0	1	0
Eukaryota	Cnidaria	Anthozoa	Scleractinia	Merulinidae	Paragoniastrea	Paragoniastrea australensis	Zotu553	0	1	0	0	0	0	0	0	0	0	0	4	0	1	6	1	0	1	38	0	0	0	1	0	0	0	0	0	0	0	0	0	0	0	0	0	0	0	0
Eukaryota	Cnidaria	Anthozoa	Scleractinia	Pocilloporidae	Pocillopora	dropped	Zotu880	0	0	0	0	0	0	0	0	0	0	0	0	0	0	0	0	0	0	0	0	0	0	0	0	0	0	0	0	0	0	0	0	0	0	0	0	1	6	1
Eukaryota	Cnidaria	Anthozoa	Scleractinia	Pocilloporidae	Pocillopora	dropped	Zotu1116	0	0	0	0	0	0	0	0	0	0	0	0	0	0	0	0	1	0	0	0	0	0	0	0	0	0	0	0	0	0	0	0	0	0	0	2	2	11	2
Eukaryota	Cnidaria	Anthozoa	Scleractinia	Poritidae	dropped	dropped	Zotu15	128	310	0	0	0	0	285	734	54	1704	217	4276	2	4325	66	1441	2401	2513	634	1433	0	0	138	2530	1269	12	3	1229	6942	3171	823	2	255	689	0	0	0	0	6
Eukaryota	Cnidaria	Anthozoa	Scleractinia	Poritidae	dropped	dropped	Zotu18	71	0	0	0	0	0	0	957	0	420	195	10	377	4	25	240	261	446	617	480	1	0	55	438	1455	0	0	84	3155	39	336	0	1	7	1	0	0	0	0
Eukaryota	Cnidaria	Anthozoa	Scleractinia	Poritidae	dropped	dropped	Zotu19	7	10	12	0	0	0	5	573	72	1560	2900	360	789	17	45	3032	6853	1696	763	680	0	0	0	1046	602	6	1	934	2664	62	98	15	77	2449	50	185	652	0	0
Eukaryota	Cnidaria	Anthozoa	Scleractinia	Poritidae	dropped	dropped	Zotu50	22	46	0	0	0	0	241	1	38	10	2837	599	9	128	2109	8	1117	376	122	122	0	0	34	436	1096	0	2	210	24	22	1	768	3	191	152	0	70	16	0
Eukaryota	Cnidaria	Anthozoa	Scleractinia	Poritidae	dropped	dropped	Zotu77	0	78	8	1	0	0	2	19	30	1080	76	24	641	114	1333	7	35	256	22	4	12	0	1	151	323	1	1	50	1836	215	0	2985	5	112	4	0	3	1	2
Eukaryota	Cnidaria	Anthozoa	Scleractinia	Poritidae	dropped	dropped	Zotu308	0	0	0	0	0	0	0	25	0	900	0	0	8	52	166	0	0	148	0	0	0	0	0	0	291	25	0	108	0	29	0	0	0	0	0	2	10	0	18
Eukaryota	Cnidaria	Anthozoa	Scleractinia	Poritidae	Porites	dropped	Zotu36	0	1513	359	7865	0	5	0	132	30	2	218	27	119	217	10	6	1	0	6	3977	30	1500	907	425	41	8	5	5	2	2084	2726	0	4900	3	4623	0	0	0	0
Eukaryota	Cnidaria	Anthozoa	Scleractinia	Poritidae	Porites	dropped	Zotu37	26	724	494	24	2	7	39	106	138	705	1015	1027	346	84	192	1036	2337	717	662	318	0	2	1285	421	1620	5	40	32	325	80	101	514	2	574	476	0	4	0	0
Eukaryota	Cnidaria	Anthozoa	Scleractinia	Poritidae	Porites	dropped	Zotu40	52	0	2	0	0	11	0	0	0	152	772	212	0	18	71	352	6	380	3	5	0	0	2073	109	255	0	14	55	1040	26	0	0	0	692	0	0	1	0	0
Eukaryota	Cnidaria	Anthozoa	Scleractinia	Poritidae	Porites	dropped	Zotu44	10	922	271	478	0	0	21	110	43	1385	605	404	535	1014	636	730	1054	809	277	386	5	1	492	575	1037	6	10	150	1194	1785	1218	1542	2070	337	2280	0	374	0	1
Eukaryota	Cnidaria	Anthozoa	Scleractinia	Poritidae	Porites	dropped	Zotu89	31	356	75	1976	0	0	1	135	51	558	82	312	168	142	244	691	213	297	34	79	3	8	43	164	170	3	0	636	1854	654	2572	8	4256	1245	4082	25	51	0	0
Eukaryota	Cnidaria	Anthozoa	Scleractinia	Poritidae	Porites	dropped	Zotu194	0	1	1	0	0	0	1	0	1	6	0	16	4	775	6	2	1	4	2	3	0	0	1	3	3	0	0	0	14	0	0	8	0	1	1	0	961	0	0
Eukaryota	Cnidaria	Anthozoa	Scleractinia	Poritidae	Porites	dropped	Zotu750	2	7	2	0	0	0	2	5	6	270	173	1275	0	145	23	645	6	0	450	4	1	1	1	111	48	0	0	0	142	135	0	0	0	252	1	0	36	0	1
Eukaryota	Cnidaria	Anthozoa	Scleractinia	Poritidae	Porites	dropped	Zotu932	0	0	0	0	0	0	0	0	0	4	0	5	2	169	100	2	4	0	0	4	0	0	0	1	0	0	0	2	1	0	0	0	0	3	0	0	10	12	47
Eukaryota	Cnidaria	Anthozoa	Scleractinia	Poritidae	Porites	Porites lobata	Zotu63	54	1209	344	1134	11	0	10	169	455	557	173	975	521	742	152	442	535	266	34	3737	76	2629	186	317	78	16	0	91	161	1227	144	305	19	507	1180	0	18	3	0
Eukaryota	Cnidaria	Anthozoa	Scleractinia	Poritidae	Porites	Porites lobata	Zotu143	1	206	849	0	12	0	2	2	43	450	700	1664	1	39	4	472	1	0	524	1	3	0	1	225	343	0	0	0	82	523	0	0	0	247	0	0	0	0	0
Eukaryota	Cnidaria	Anthozoa	Scleractinia	Poritidae	Porites	Porites lobata	Zotu161	28	76	57	54	0	0	72	12	88	31	179	517	16	161	2760	16	126	245	23	70	0	0	28	96	144	4	0	251	418	18	86	791	196	118	549	1	105	939	0
Eukaryota	Cnidaria	Anthozoa	Scleractinia	Poritidae	Porites	Porites monticulosa	Zotu9	0	0	0	0	0	0	0	0	0	0	0	0	0	0	0	0	1	0	0	27	23376	9872	5796	117	10	13057	10895	0	0	0	0	0	0	0	0	0	0	1	0
Eukaryota	Cnidaria	Anthozoa	Scleractinia		Leptastrea	Leptastrea pruinosa	Zotu20	0	0	1	169	775	75	38	257	24	0	10	0	0	6646	3104	0	0	293	0	2349	0	0	0	0	15	0	14	1	0	101	0	0	82	319	10	35207	1287	23	176
Eukaryota	Cnidaria	Anthozoa	Scleractinia		Leptastrea	Leptastrea pruinosa	Zotu59	0	0	0	0	0	0	0	0	0	0	0	0	0	2366	21	0	0	0	0	7788	0	0	0	0	0	0	0	0	0	0	0	0	0	0	0	18	153	0	0
Eukaryota	Cnidaria	Anthozoa	Scleractinia		Leptastrea	Leptastrea pruinosa	Zotu81	0	0	1	2	88	14	5	36	2	1	0	0	0	2517	10	0	0	26	0	28	0	0	0	0	0	0	26	0	2	11	0	0	0	110	0	4107	72	0	23
Eukaryota	dropped	dropped	dropped	dropped	dropped	dropped	Zotu27	0	0	0	0	0	0	1	0	1	0	0	0	0	0	0	0	1	0	0	41	24311	16348	10405	717	154	18809	15432	0	0	0	0	0	0	0	0	0	0	0	0

## Sheet: sample_data
S1 Appendix. 18Suni assay and ITS2 assay ZOTU assignment based on DNA isolated from seawater and oval butterflyfish (Chaetodon lunulatus) gut samples collected at 10 sites from Dongsha Atoll (Taiwan) in the South China Sea. The numbers in cells are the number of unique reads per ZOTU. BLANK4 refers to one of the extraction blanks that produced reads, indicated by the highlighted rows in yellow, w…
sample_name	substrate	all_dataset	paired_dataset	site
Clu1a	gut	yes	yes	DS 6
Clu2a	gut	yes	yes	DS 6
Clu3a	gut	yes	yes	DS 6
Clu4a	gut	yes	yes	DS 6
Clu5a	gut	yes	yes	DS 6
Clu6a	gut	yes	yes	DS 4
Clu7a	gut	yes	no	DS 9
Clu8a	gut	yes	no	DS 9
Clu9a	gut	yes	no	DS 9
Clu10a	gut	yes	no	DS 9
Clu11a	gut	yes	no	DS 9
Clu12a	gut	yes	no	DS 9
Clu13a	gut	yes	no	DS 9
Clu14a	gut	yes	no	DWC
Clu15a	gut	yes	no	DWC
Clu16a	gut	yes	no	DS 9
Clu17a	gut	yes	no	DS 9
Clu18a	gut	yes	no	DS 9
Clu19a	gut	yes	no	DS 9
Clu20a	gut	yes	yes	DS 13
Clu21a	gut	yes	yes	DS 13
Clu22a	gut	yes	yes	DS 13
Clu23a	gut	yes	yes	DS 13
Clu24a	gut	yes	yes	DS 13
Clu25a	gut	yes	yes	DS 13
Clu26a	gut	yes	yes	DS 13
Clu27a	gut	yes	yes	DS 13
Clu28b	gut	yes	no	DS 10
Clu29b	gut	yes	no	DS 10
Clu30b	gut	yes	no	DS 10
Clu32b	gut	yes	no	DS 10
Clu33b	gut	yes	no	DS 10
Clu34b	gut	yes	no	DS 10
Clu35b	gut	yes	no	DS 10
Clu36b	gut	yes	no	DS 10
Clu37b	gut	yes	no	BG
Clu38b	gut	yes	no	BG
Clu39b	gut	yes	no	BG
Clu40b	gut	yes	no	BG
DGX1	water	yes	yes	DS 4
DGX2	water	yes	yes	DS 4
DGX3	water	yes	yes	DS 4
DGX4	water	yes	yes	DS 4
DGX5	water	yes	yes	DS 4
DGX6	water	yes	yes	DS 4
DGX7	water	yes	yes	DS 6
DGX8	water	yes	yes	DS 6
DGX9	water	yes	yes	DS 6
DGX10	water	yes	yes	DS 6
DGX11	water	yes	yes	DS 6
DGX12	water	yes	yes	DS 6
DGX13	water	yes	yes	DS 13
DGX14	water	yes	yes	DS 13
DGX15	water	yes	yes	DS 13
DGX16	water	yes	yes	DS 13
DGX17	water	yes	yes	DS 13
DGX18	water	yes	yes	DS 13
DGX19	water	yes	no	DE
DGX20	water	yes	no	DE
DGX21	water	yes	no	DE
DGX22	water	yes	no	DE
DGX23	water	yes	no	DE
DGX24	water	yes	no	DE
DGX25	water	yes	no	WLW
DGX26	water	yes	no	WLW
DGX27	water	yes	no	WLW
DGX28	water	yes	no	WLW
DGX29	water	yes	no	WLW
DGX30	water	yes	no	WLW
DGX31	water	yes	no	NSB
DGX32	water	yes	no	NSB
DGX33	water	yes	no	NSB
DGX34	water	yes	no	NSB
DGX35	water	yes	no	NSB
DGX36	water	yes	no	NSB
